# Supplementary material for: Visible-light-driven proton reduction for semi-hydrogenation of alkynesviaorganophotoredox/manganese dual catalysis
Source: Royal Society of Chemistry journal article supplement (doi:10.1039/d2ra07920h), 2022-01-01
Supplement: d2ra07920h1.pdf [file d2ra07920h1.pdf]

## *Supporting Information*

# **Visible-light-Driven Proton Reduction for Semi-hydrogenation of Alkynes via Organophotoredox/Manganese Dual Catalysis**

Xiao-Yu Wang,<sup>a,†</sup> Yong-Qin He,<sup>b,†</sup> Mei Wang,<sup>a</sup> Yi Zhou,<sup>a</sup> Na Li,<sup>b</sup> Xian-Rong Song,<sup>a</sup> Zhao-Zhao Zhou,<sup>c</sup> Wan-Fa Tian,<sup>a,\*</sup> Qiang Xiao<sup>a,\*</sup>

<sup>a</sup> Key Laboratory of Organic Chemistry of Jiangxi Province, Jiangxi Science & Technology Normal University, Nanchang, 330013, P.R. China.

<sup>b</sup> School of Pharmaceutical Science, Nanchang University, Nanchang, 330006, P.R. China.

<sup>c</sup> College of Chemistry and Food Science, Nanchang Normal University, Nanchang, P. R. China.

<sup>†</sup> X.-Y. Wang. and Y.-Q. He. contributed equally to this work.

\*E-mail: [tianwanfa@yeah.net](mailto:tianwanfa@yeah.net)

\*E-mail: [xiaoqiang@tsinghua.org.cn](mailto:xiaoqiang@tsinghua.org.cn)

## **Table of Contents**

|                                                                           |            |
|---------------------------------------------------------------------------|------------|
| <b>General information .....</b>                                          | <b>S2</b>  |
| <b>Methods for preparing [Mn-1] .....</b>                                 | <b>S3</b>  |
| <b>XPS Spectra of [Mn-1].....</b>                                         | <b>S4</b>  |
| <b>Comparison of HRMS Spectra of Mn(acac)<sub>2</sub> and [Mn-1].....</b> | <b>S5</b>  |
| <b>General Procedure for Synthesis of 2 and 3 .....</b>                   | <b>S8</b>  |
| <b>Conditional Screening .....</b>                                        | <b>S9</b>  |
| <b>Characterization Data for Products .....</b>                           | <b>S10</b> |
| <b>Mechanistic studies .....</b>                                          | <b>S16</b> |
| <b>Possible reaction mechanism .....</b>                                  | <b>S24</b> |
| <b>Spectrum .....</b>                                                     | <b>S25</b> |
| <b>References .....</b>                                                   | <b>S59</b> |

## 1. General Information

The alkynes were either purchased from chemical energy or synthesized according to the reported literature.<sup>1</sup>  $\text{Mn}(\text{acac})_2 \cdot 2\text{H}_2\text{O}$  were purchased from Adamas-beta. THF were extra dry solvent also purchased from chemical energy. If no special indicated, other reagents and solvents were used as commercially available without further purification. All the reactions were carried out under argon atmosphere. Column chromatographic purification of products was accomplished using 200-300 mesh silica gel. NMR spectra were measured on a Bruker Avance-400 spectrometer in the solvents indicated; chemical shifts are reported in units (ppm) by assigning TMS resonance in the  $^1\text{H}$  spectrum as 0.00 ppm or  $\text{CHCl}_3$  resonance in  $\text{CDCl}_3$  as 7.26 ppm,  $\text{CDCl}_3$  resonance in the  $^{13}\text{C}$  spectrum as 77.0 ppm, and  $\text{DMSO}-d_6$  resonance in the  $^1\text{H}$  spectrum as 2.50 ppm and  $^{13}\text{C}$  spectrum as 39.52 ppm. Coupling constants are reported in Hz with multiplicities denoted as br (broad), s (singlet), bs (broad singlet), d (doublet), t (triplet), q (quartet) and m (multiplet). HRMS were performed on Fourier Transform Ion Cyclotron Resonance Mass Spectrometer. The emission spectra were recorded using a HITACHI F-7000 FL Spectrophotometer. Cyclic voltammetry experiments were studied on a CHI660E Electrochemical Workstation equipped with the conventional three electrode system under argon atmosphere. The measurements were performed in solvent of  $\text{CH}_3\text{CN}$  containing 0.1 M  $n\text{-Bu}_4\text{PF}_6$  using ferrocene/ferrocenium ( $\text{Fc}^+/\text{Fc}^0$ ) as an internal reference. The working electrode was a glassy carbon disk electrode ( $d = 0.3$  cm). The auxiliary and reference electrode consisted of a Pt tablets and an  $\text{Ag}/\text{AgNO}_3$  (0.1 M in  $\text{CH}_3\text{CN}$ ), respectively. Irradiation was carried out on Wattecs Parallel Light Reactor (Blue, 10 W, 445 nm–450 nm) equipping with a coolant circulating pump. X-ray photoelectron spectroscopic measurement was recorded by Thermo Scientific K-Alpha.

## 2. Methods for Preparing [Mn-1].

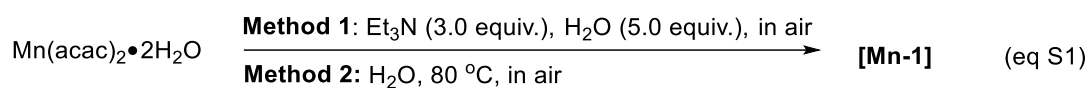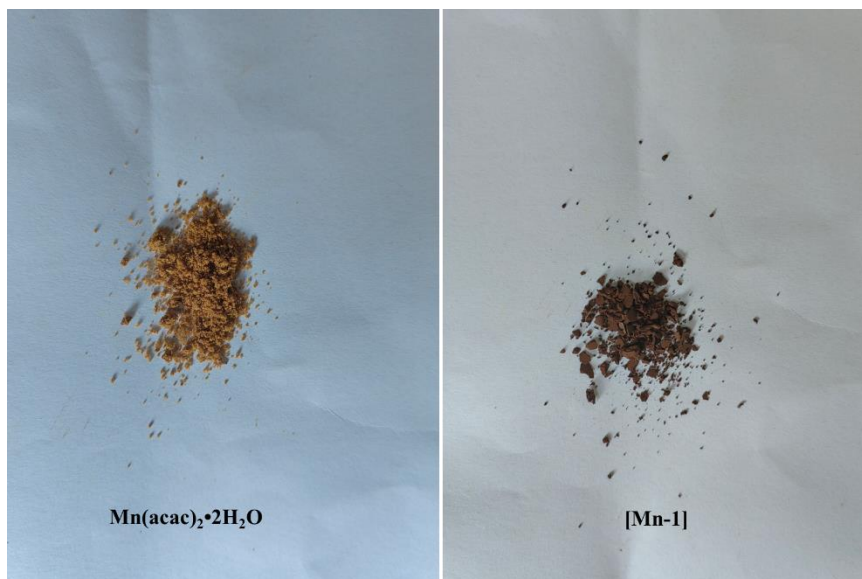

### Method

To a 100 mL round bottom flask containing a stirring bar and  $\text{Mn}(\text{acac})_2 \cdot 2\text{H}_2\text{O}$  (yellow, 10 mmol, 2.53 g, purchased from Adamas-beta) was added  $\text{Et}_3\text{N}$  (30 mmol, 4.2 mL) and  $\text{H}_2\text{O}$  (50 mmol, 0.9 mL). This mixture quickly turned to black color within 10 min at 30  $^\circ\text{C}$ , which mixture continued stirring for another 2 h. Subsequently, the solvent was removed in vacuum and the residue was dried in a vacuum oven overnight to give the dark brown solid **[Mn-1]** 2.61 g.

### Another method for forming catalytic active pre-catalyst

To a 100 ml round bottom flask containing a stirring bar and  $\text{Mn}(\text{acac})_2 \cdot 2\text{H}_2\text{O}$  (yellow, 10.0 mmol, 2.53 g) was added  $\text{H}_2\text{O}$  (6.0 mL). This mixture was vigorously stirred at 80  $^\circ\text{C}$  in air overnight and the solvent was totally evaporated. Then, the dark brown colored Mn catalyst in the flask was collected in 1.96 g.

### 3. XPS Spectra of [Mn-1].

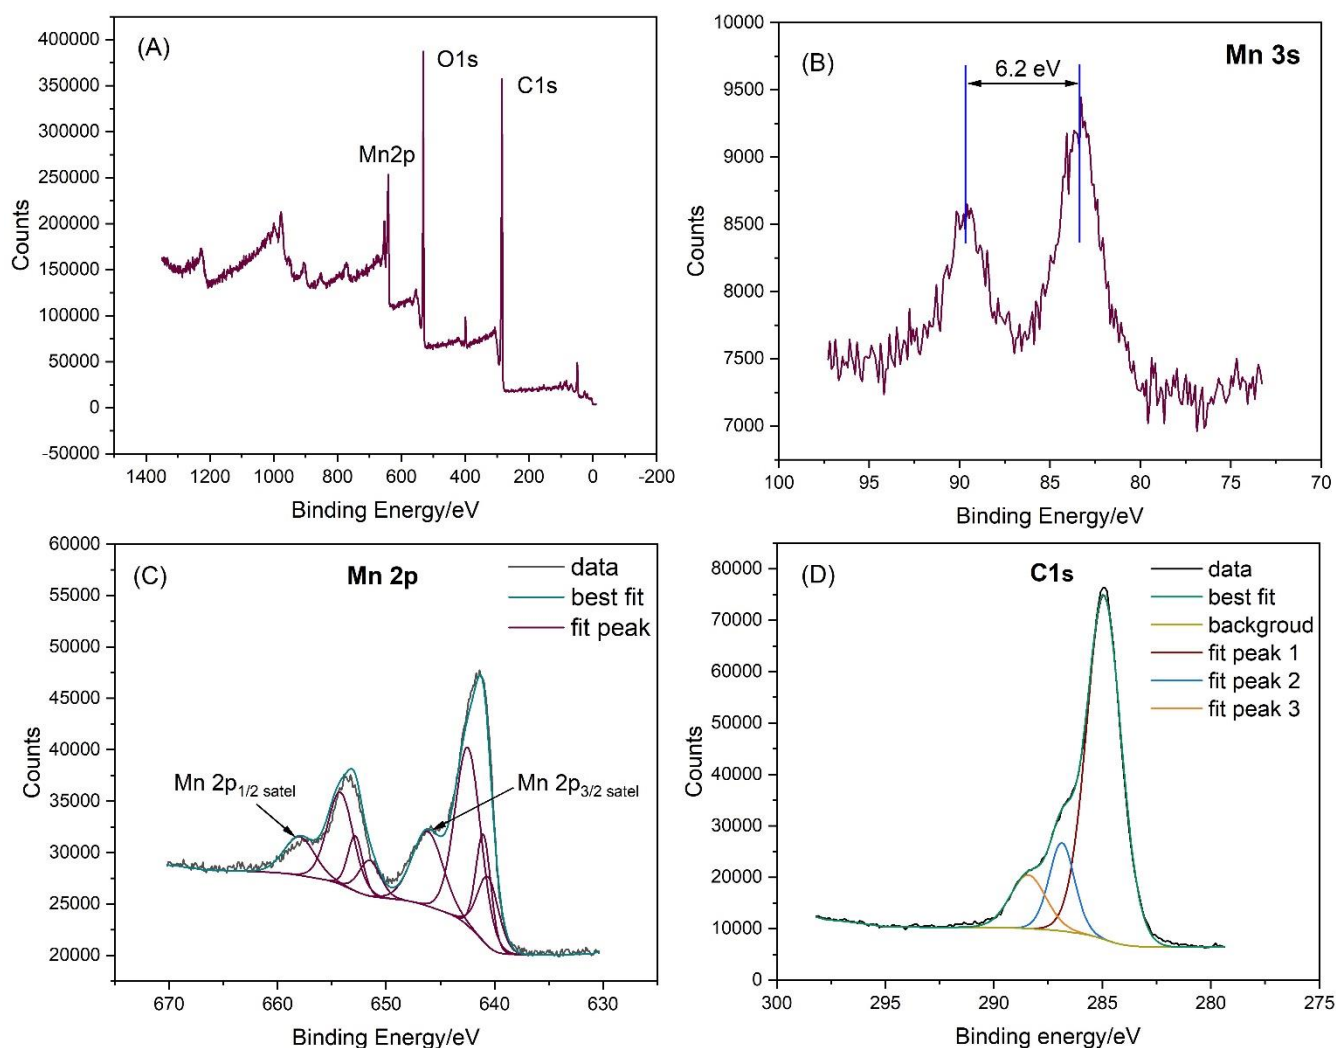

**Figure S1.** X-Ray photoelectron spectra of [Mn-1].

**Table S1.** Comparison the analytical data (Atom%) for free Mn(acac)<sub>2</sub> and [Mn-1] via XPS analysis.<sup>a</sup>

| Compounds                              | C     | O     | Mn   | O/Mn ratio |
|----------------------------------------|-------|-------|------|------------|
| Mn(acac) <sub>2</sub> <sup>ref 2</sup> | 66.32 | 26.79 | 5.63 | 4.8/1      |
| <b>[Mn-1]</b>                          | 70.15 | 24.48 | 5.37 | 4.6/1      |

<sup>a</sup>The data of O/Mn ratio for Mn(acac)<sub>2</sub> comes from *ref 3a*.

X-ray photoelectron spectroscopic measurement was recorded by Thermo Scientific K-Alpha. Al(K $\alpha$ ) [1486.6 eV] radiation was used for excitation and the measured binding energies were calculated with respect to the C(1s) level, present in samples, which was assumed to have a binding energy of 284.8 eV. Spectra were analyzed using Avantage software and related literature<sup>2</sup>.

A reliable approach to determine the oxidation state of Mn is the evaluation of the peak binding energy distance in the multiplet split Mn3s region.<sup>3</sup> Thus, for the sample of **[Mn-1]**, both peaks of Mn3s and Mn2p was recorded (Figure S1, A). The 3s splitting energies for reference samples were 5.8 eV for MnO, 5.3 eV for MnOOH and 4.6 eV for MnO<sub>2</sub>.<sup>3a</sup> As a comparison, the 3s peak widths in the samples of **[Mn-1]** were 6.2 eV, consistent with the character of Mn(II) species, suggesting that **[Mn-1]** still exists mainly in an oxidation of II (Figure S1, B).

Besides, both Mn 2p<sub>1/2</sub> and Mn 2p<sub>3/2</sub> displayed shake-up satellite peaks (Figure S1, C), which phenomenon is widely found in manganese (II/III)  $\beta$ -diketonato complex.<sup>4</sup> This phenomenon originates from the charge transfer between outer electron shell of ligand and an unfilled 3d shell of Mn during creation of core-hole in the photoelectron process, indicating the presence of diketonato-type ligand in **[Mn-1]**. This deduction is further confirmed by O/Mn atomic ratio, since **[Mn-1]** (O/Mn = 4.6/1) displayed a similar O/Mn ratio towards Mn(acac)<sub>2</sub> (O/Mn = 4.8/1, see Table 1), which is obviously higher than manganese oxide (e.g. MnO, Mn<sub>2</sub>O<sub>3</sub>, MnO<sub>2</sub>, O/Mn ratio range from 1/1 to 2/1).

#### 4. Comparison of HRMS Spectra of Mn(acac)<sub>2</sub>•2H<sub>2</sub>O and **[Mn-1]**.

The high-resolution mass spectra (HRMS) of both Mn(acac)<sub>2</sub>•2H<sub>2</sub>O and **[Mn-1]** were recorded. As shown in Figure S2, Mn(acac)<sub>2</sub>•2H<sub>2</sub>O displayed a clear molecular ion peak located at 253.0291, which was well consistent with the calculated value (253.0273). From HRMS analysis (Figure S3), we found that none of Mn(acac)<sub>2</sub>•2H<sub>2</sub>O exist in **[Mn-1]**, demonstrating the full conversion of the reaction (see eq S1). Unfortunately, we could not speculate the possible structure of **[Mn-1]** at this stage.

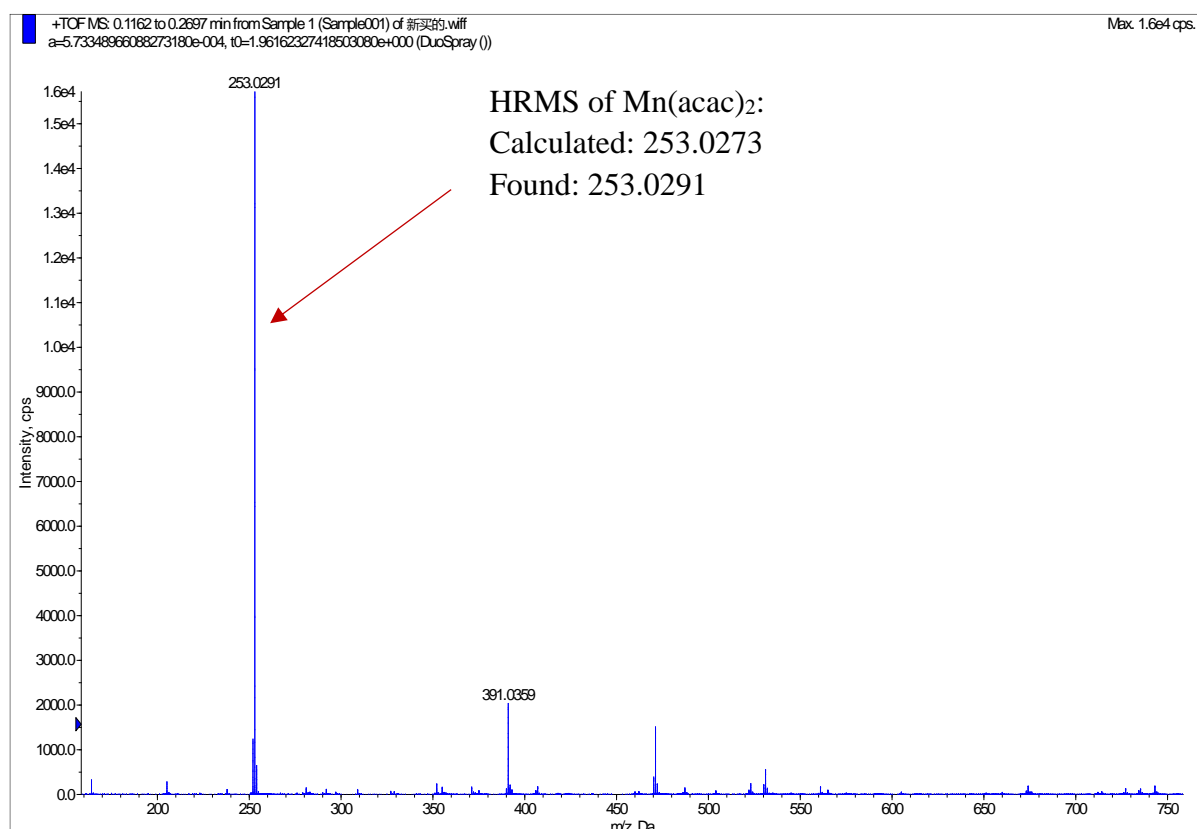

**Figure S2.** HRMS spectrum of  $\text{Mn}(\text{acac})_2$ .

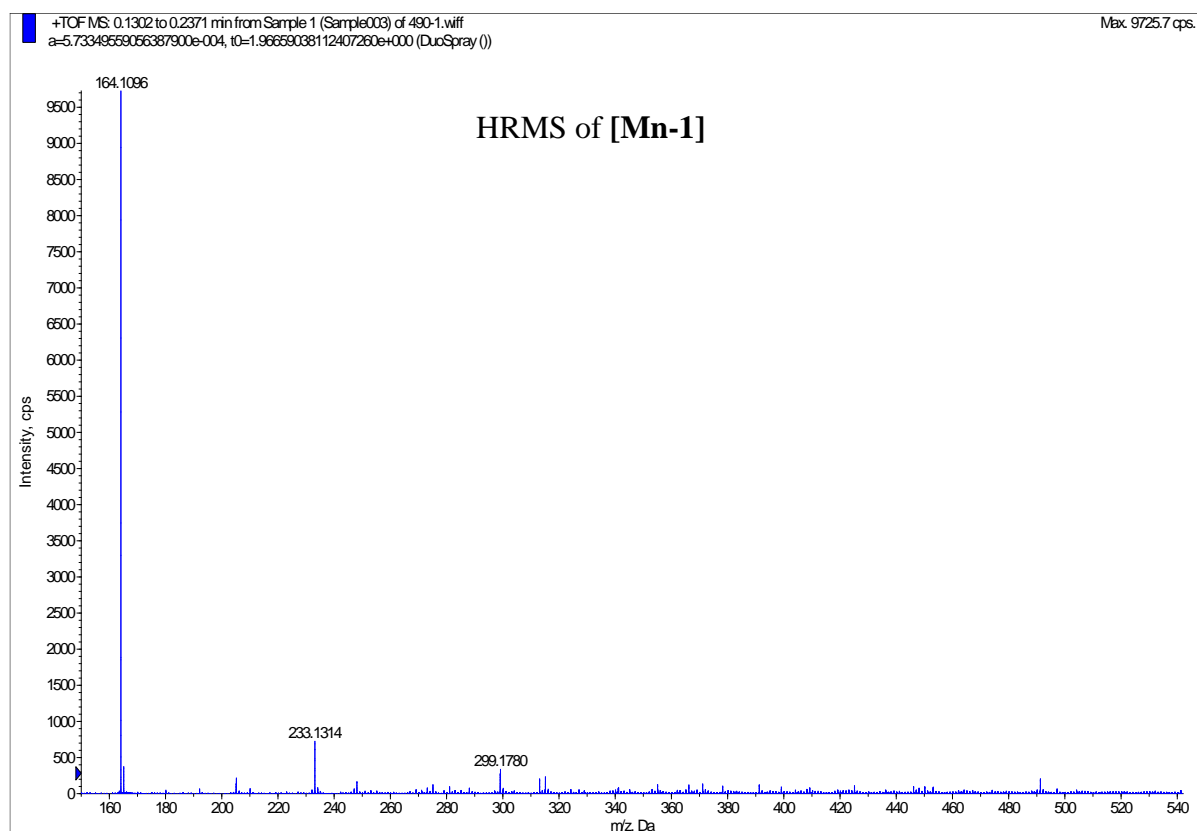

**Figure S3.** HRMS spectrum of **[Mn-1]**.

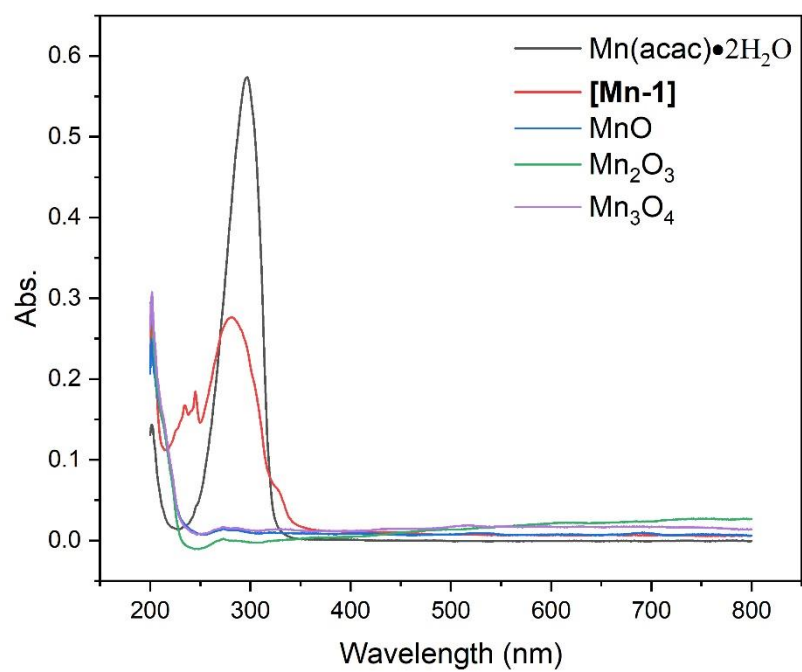

**Figure S4.** UV-vis spectra of  $\text{Mn}(\text{acac})_2 \cdot 2\text{H}_2\text{O}$ , **[Mn-1]**, and Mn oxides.

## 5. General Procedure for Synthesis of **2** and **3**.

Substrate **1** (0.20 mmol, 1.0 equiv), 4CzIPN (0.004 mmol, 2 mol%), [**Mn-1**] (2.5 mg), and **L2** (0.03 mmol, 15 mol%) were added into a 20 mL reaction tube. Then, DIPEA (0.6 mmol, 3.0 equiv.), AcOH (1.0 mmol, 5.0 equiv.), and anhydrous THF (2.0 mL) were sequentially added to the reaction tube via syringe in Ar atmosphere. The reaction mixture was stirred at ambient temperature (28 ~ 30 °C) for 6 h on Watecs Parallel Light Reactor. A coolant circulating pump is equipped with the Parallel Light Reactor to keep the temperature constant. Finally, the solvent was removed in vacuum and the residue was purified by column chromatography on silica gel to afford the compound **2** or **3**.

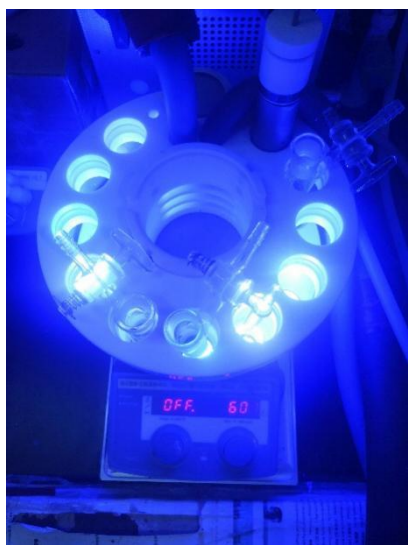

**Watecs Parallel Light Reactor equipped with a coolant circulating pump (Blue LED Light source, 445-450 nm, 10 W every position)**



## 6. Conditional Screening

**Table S2.** Optimization of the reaction conditions.<sup>[a]</sup>

| <div style="display: flex; justify-content: space-around; align-items: center;"> <div style="text-align: center;"> <p> <b>L1</b>, R<sup>1</sup> = t-Bu, R<sup>2</sup> = R<sup>3</sup> = H<br/> <b>L2</b>, R<sup>1</sup> = R<sup>3</sup> = H, R<sup>2</sup> = Me<br/> <b>L3</b>, R<sup>1</sup> = R<sup>2</sup> = H, R<sup>3</sup> = Me         </p> </div> <div style="text-align: center;"> <p><b>L4</b>, R = H</p> </div> <div style="text-align: center;"> <p><b>L5</b>, R = Me</p> </div> </div> |                                                                  |                                                                       |              |                               |                     |
|-----------------------------------------------------------------------------------------------------------------------------------------------------------------------------------------------------------------------------------------------------------------------------------------------------------------------------------------------------------------------------------------------------------------------------------------------------------------------------------------------------|------------------------------------------------------------------|-----------------------------------------------------------------------|--------------|-------------------------------|---------------------|
| entry                                                                                                                                                                                                                                                                                                                                                                                                                                                                                               | photocatalyst                                                    | [Mn]                                                                  | ligand       | solvent                       | yield (%)           |
|                                                                                                                                                                                                                                                                                                                                                                                                                                                                                                     |                                                                  |                                                                       |              |                               | <b>2a : 3a : 4a</b> |
| 1                                                                                                                                                                                                                                                                                                                                                                                                                                                                                                   | 4CzIPN                                                           | Mn(acac) <sub>2</sub> •2H <sub>2</sub> O                              | <b>L1~L5</b> | 1,4-dioxane                   | n.r.                |
| 2                                                                                                                                                                                                                                                                                                                                                                                                                                                                                                   | 4CzIPN                                                           | <b>[Mn-1]</b>                                                         | <b>L1</b>    | 1,4-dioxane                   | n.r.                |
| 3                                                                                                                                                                                                                                                                                                                                                                                                                                                                                                   | 4CzIPN                                                           | <b>[Mn-1]</b>                                                         | <b>L2</b>    | 1,4-dioxane                   | 44 : 20 : 0         |
| 4                                                                                                                                                                                                                                                                                                                                                                                                                                                                                                   | 4CzIPN                                                           | <b>[Mn-1]</b>                                                         | <b>L3</b>    | 1,4-dioxane                   | n.r.                |
| 5                                                                                                                                                                                                                                                                                                                                                                                                                                                                                                   | 4CzIPN                                                           | <b>[Mn-1]</b>                                                         | <b>L4</b>    | 1,4-dioxane                   | n.r.                |
| 6                                                                                                                                                                                                                                                                                                                                                                                                                                                                                                   | 4CzIPN                                                           | <b>[Mn-1]</b>                                                         | <b>L5</b>    | 1,4-dioxane                   | 20 : 6 : 0          |
| 7                                                                                                                                                                                                                                                                                                                                                                                                                                                                                                   | 4CzIPN                                                           | <b>[Mn-1]</b>                                                         | dppp         | 1,4-dioxane                   | n.r.                |
| 8                                                                                                                                                                                                                                                                                                                                                                                                                                                                                                   | 4CzIPN                                                           | <b>[Mn-1]</b>                                                         | <b>L2</b>    | THF                           | 85 : 15 : 0         |
| 9                                                                                                                                                                                                                                                                                                                                                                                                                                                                                                   | 4CzIPN                                                           | <b>[Mn-1]</b>                                                         | <b>L2</b>    | CH <sub>3</sub> CN or acetone | n.r.                |
| 10                                                                                                                                                                                                                                                                                                                                                                                                                                                                                                  | 4CzIPN                                                           | Mn(acac) <sub>3</sub>                                                 | <b>L2</b>    | THF                           | n.r.                |
| 11 <sup>[b]</sup>                                                                                                                                                                                                                                                                                                                                                                                                                                                                                   | 4CzIPN                                                           | <b>[Mn-1]</b>                                                         | <b>L2</b>    | THF                           | n.r.                |
| 12                                                                                                                                                                                                                                                                                                                                                                                                                                                                                                  | Ir[dF(CF <sub>3</sub> )ppy] <sub>2</sub> (dtbbpy)PF <sub>6</sub> | <b>[Mn-1]</b>                                                         | <b>L2</b>    | THF                           | n.r.                |
| 13                                                                                                                                                                                                                                                                                                                                                                                                                                                                                                  | Ir(ppy) <sub>2</sub> (bpy)PF <sub>6</sub>                        | <b>[Mn-1]</b>                                                         | <b>L2</b>    | THF                           | 38 : 16 : 0         |
| 14                                                                                                                                                                                                                                                                                                                                                                                                                                                                                                  | -                                                                | <b>[Mn-1]</b>                                                         | <b>L2</b>    | THF                           | n.r.                |
| 15                                                                                                                                                                                                                                                                                                                                                                                                                                                                                                  | 4CzIPN                                                           | -                                                                     | -            | THF                           | n.r.                |
| 16 <sup>[c]</sup>                                                                                                                                                                                                                                                                                                                                                                                                                                                                                   | 4CzIPN                                                           | <b>[Mn-1]</b>                                                         | <b>L2</b>    | THF                           | n.r.                |
| 17 <sup>[d]</sup>                                                                                                                                                                                                                                                                                                                                                                                                                                                                                   | 4CzIPN                                                           | <b>[Mn-1]</b>                                                         | <b>L2</b>    | THF                           | n.r.                |
| 18 <sup>[e]</sup>                                                                                                                                                                                                                                                                                                                                                                                                                                                                                   | 4CzIPN                                                           | <b>[Mn-1]</b>                                                         | <b>L2</b>    | THF                           | 83 : 17 : 0         |
| 19                                                                                                                                                                                                                                                                                                                                                                                                                                                                                                  | 4CzIPN                                                           | MnO, Mn <sub>2</sub> O <sub>3</sub> or Mn <sub>3</sub> O <sub>4</sub> | <b>L2</b>    | THF                           | n.r.                |

<sup>[a]</sup> **1a** (0.2 mmol), PC (2 mol%), Mn(acac)<sub>2</sub>•2H<sub>2</sub>O (5 mol%) or **[Mn-1]** (2.5 mg), ligand (15 mol%), DIPEA (3.0 eq.), acid (5.0 eq.), solvent (2.0 mL), irradiation with blue LED for 6 h. Yields were determined by <sup>1</sup>H NMR spectroscopy vs. Cl<sub>2</sub>CHCHCl<sub>2</sub> as an internal standard. <sup>[b]</sup> H<sub>2</sub>O instead of AcOH. <sup>[c]</sup> No DIPEA or AcOH. <sup>[d]</sup> In dark. <sup>[e]</sup> With a drop of Hg.

## 7. Characterization Data for Products

(*Z*)-1,2-Diphenylethylene **2a**<sup>5</sup> and (*E*)-1,2-Diphenylethylene **3a**<sup>5</sup>

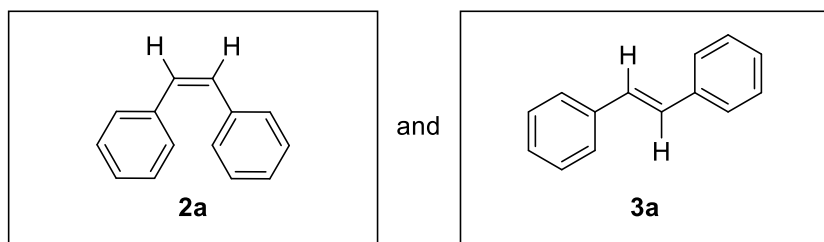

Purified by column chromatography on silica gel (petroleum ether/ethyl acetate /DCM = 200/1/1), total yield: >99% (35.8 mg), *Z*:*E* = 85:15. **2a**: <sup>1</sup>H NMR (400 MHz, CDCl<sub>3</sub>) δ 7.25–7.16 (m, 10H), 6.59 (s, 2H). <sup>13</sup>C NMR (100 MHz, CDCl<sub>3</sub>) δ 137.2 (2C), 130.2 (2C), 128.9 (4C), 128.2 (4C), 127.1 (2C). **3a**: <sup>1</sup>H NMR (400 MHz, CDCl<sub>3</sub>) δ 7.50 (d, *J* = 7.6 Hz, 4H), 7.35 (t, *J* = 7.6 Hz, 4H), 7.27–7.22 (m, 2H), 7.10 (s, 2H). <sup>13</sup>C NMR (100 MHz, CDCl<sub>3</sub>) δ 137.4 (2C), 128.7 (2C), 128.7 (4C), 127.6 (2C), 126.5 (4C).

(*Z*)-1-methyl-4-styrylbenzene **2b**<sup>5</sup> and (*E*)-1-methyl-4-styrylbenzene **3b**<sup>5</sup>

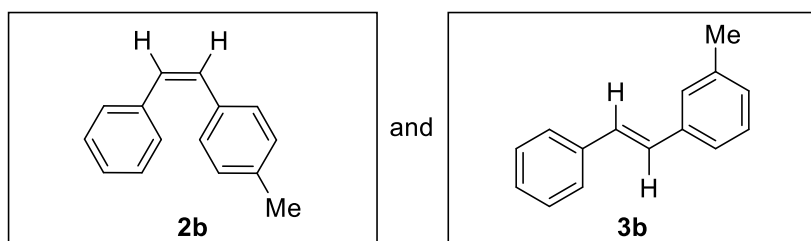

Purified by column chromatography on silica gel (petroleum ether/ethyl acetate /DCM = 200/1/1), total yield: 95% (37.0 mg), *Z*:*E* = 63:37. **2b**: <sup>1</sup>H NMR (400 MHz, CDCl<sub>3</sub>) δ 7.27–7.17 (m, 5H), 7.14 (d, *J* = 8.0 Hz, 2H), 7.02 (d, *J* = 7.6 Hz, 2H), 6.55 (s, 2H), 2.30 (s, 3H). <sup>13</sup>C NMR (100 MHz, CDCl<sub>3</sub>) δ 137.5, 136.8, 134.2, 130.2, 129.5, 128.9 (2C), 128.8 (2C), 128.8 (2C), 128.2 (2C), 126.9, 21.2. **3b**: <sup>1</sup>H NMR (400 MHz, CDCl<sub>3</sub>) δ 7.51 (d, *J* = 7.6 Hz, 2H), 7.42 (d, *J* = 8.0 Hz, 2H), 7.35 (t, *J* = 7.6 Hz, 2H), 7.26–7.23 (m, 1H), 7.17 (d, *J* = 7.6 Hz, 2H), 7.08 (d, *J* = 2.4 Hz, 2H), 2.36 (s, 3H). <sup>13</sup>C NMR (100 MHz, CDCl<sub>3</sub>) δ 137.5 (2C), 134.6, 129.4 (2C), 128.6 (2C), 128.6, 127.7, 127.4, 126.4 (2C), 126.4 (2C), 21.2.

(*Z*)-1-methoxy-4-styrylbenzene **2c**<sup>5</sup> and (*E*)-1-methoxy-4-styrylbenzene **3c**<sup>5</sup>

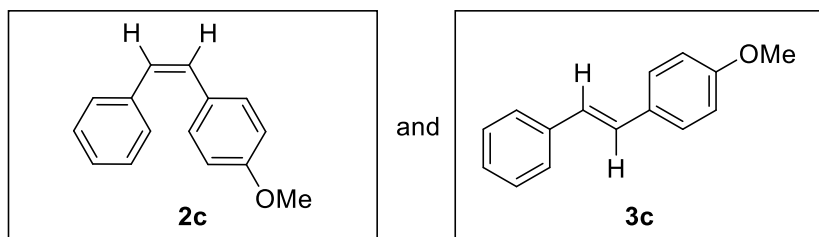

Purified by column chromatography on silica gel (petroleum ether/ethyl acetate/DCM = 200/1/1), total yield: 99% (41.5 mg), *Z:E* = 72:28. **2c**:  $^1\text{H}$  NMR (400 MHz,  $\text{CDCl}_3$ )  $\delta$  7.28–7.17 (m, 7H), 6.75 (d,  $J$  = 8.8 Hz, 2H), 6.55–6.48 (m, 2H), 3.77 (s, 3H).  $^{13}\text{C}$  NMR (100 MHz,  $\text{CDCl}_3$ )  $\delta$  158.6, 137.6, 130.1 (2C), 129.7, 129.6, 128.8 (2C), 128.7, 128.2 (2C), 126.9, 113.5 (2C), 55.1. **3c**:  $^1\text{H}$  NMR (400 MHz,  $\text{CDCl}_3$ )  $\delta$  7.50–7.44 (m, 4H), 7.34 (t,  $J$  = 7.6 Hz, 2H), 7.24 (d,  $J$  = 6.4 Hz, 1H), 7.07 (d,  $J$  = 16.0 Hz, 1H), 6.97 (d,  $J$  = 16.4 Hz, 1H), 6.90 (d,  $J$  = 8.8 Hz, 2H), 3.82 (s, 3H).  $^{13}\text{C}$  NMR (100 MHz,  $\text{CDCl}_3$ )  $\delta$  159.3, 137.6, 130.1, 128.6 (2C), 128.2, 127.7 (2C), 127.2, 126.6, 126.2 (2C), 114.1 (2C), 55.3.

(*Z*)-1,2-Di-(4-methoxyphenyl)ethylene **2d**<sup>6</sup>

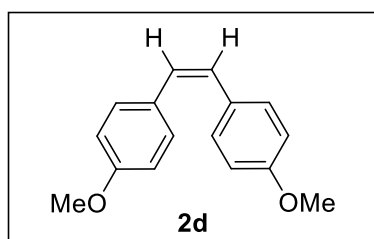

Purified by column chromatography on silica gel (petroleum ether/ethyl acetate/DCM = 200/1/1), yield: 75% (35.9 mg), *Z:E* > 95:5. **2d**:  $^1\text{H}$  NMR (400 MHz, DMSO)  $\delta$  7.16 (d,  $J$  = 8.4 Hz, 4H), 6.82 (d,  $J$  = 8.8 Hz, 4H), 6.44 (s, 2H), 3.72 (s, 6H).  $^{13}\text{C}$  NMR (100 MHz, DMSO)  $\delta$  158.3 (2C), 129.7 (4C), 129.4 (2C), 128.1 (2C), 113.8 (4C), 55.0 (2C).

(*Z*)-1,3-dimethoxy-5-(4-methoxystyryl)benzene **2e**<sup>7</sup>

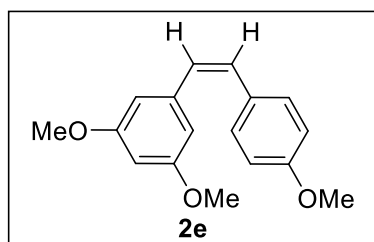

Purified by column chromatography on silica gel (petroleum ether/ethyl acetate /DCM = 100/1/1), total yield: 97% (52.3 mg), *Z:E* = 79:21. **2e**:  $^1\text{H}$  NMR (400 MHz,  $\text{CDCl}_3$ )  $\delta$  7.21 (d,  $J$  = 8.4 Hz, 2H), 6.76 (d,  $J$  = 8.4 Hz, 2H), 6.52 (d,  $J$  = 12.4 Hz, 1H), 6.45–6.43 (m, 3H), 6.32 (s, 1H), 3.78 (s, 3H), 3.67 (s, 6H).  $^{13}\text{C}$  NMR (100 MHz,  $\text{CDCl}_3$ )  $\delta$  160.5 (2C), 158.7,

139.4, 130.2 (2C), 130.1, 129.5, 128.6, 113.5 (2C), 106.6 (2C), 99.6, 55.2 (3C).

(*Z*)-1-fluoro-4-styrylbenzene **2f**<sup>5</sup>

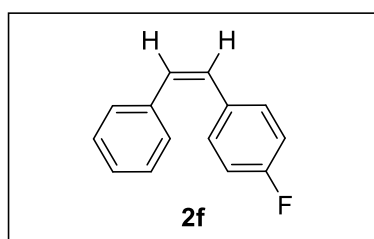

Purified by column chromatography on silica gel (petroleum ether/ethyl acetate/DCM = 200/1/1), total yield: 91% (36.0 mg), *Z:E* = 80:20. **2f**:  $^1\text{H}$  NMR (400 MHz,  $\text{CDCl}_3$ )  $\delta$  7.24–7.18 (m, 7H), 6.90 (t,  $J$  = 8.8 Hz, 2H), 6.59 (d,  $J$  = 12.0 Hz, 1H), 6.53 (d,  $J$  = 12.0 Hz, 1H).  $^{13}\text{C}$  NMR (100 MHz,  $\text{CDCl}_3$ )  $\delta$  161.8 (d,  $^1J_{\text{C-F}}$  = 245.2 Hz), 137.0, 133.2 (d,  $^4J_{\text{C-F}}$  = 3.4 Hz),

130.5 (d,  $^3J_{\text{C-F}}$  = 7.8 Hz), 130.5 (d,  $^3J_{\text{C-F}}$  = 7.8 Hz), 130.2, 129.0, 128.8 (2C), 128.3 (2C), 127.2, 115.2 (d,  $^2J_{\text{C-F}}$  = 21.2 Hz), 115.0 (d,  $^2J_{\text{C-F}}$  = 21.2 Hz).  $^{19}\text{F}$  NMR (376 MHz,  $\text{CDCl}_3$ ):  $\delta$  -114.7.

(*Z*)-1-chloro-3-styrylbenzene **2g**<sup>5</sup>

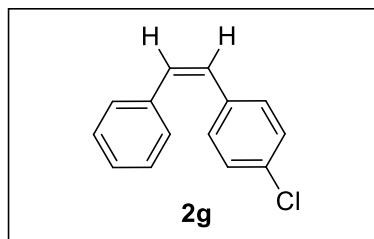

Purified by column chromatography on silica gel (petroleum ether/ethyl acetate/DCM = 200/1/1), total yield: 74% (31.5 mg), *Z:E* = 80:20. **2g**: <sup>1</sup>H NMR (400 MHz, CDCl<sub>3</sub>) δ 7.25–7.15 (m, 9H), 6.62 (d, *J* = 12.0 Hz, 1H), 6.52 (d, *J* = 12.4 Hz, 1H). <sup>13</sup>C NMR (100 MHz, CDCl<sub>3</sub>) δ 136.8, 135.6, 132.7, 130.9, 130.2 (2C), 128.9, 128.8 (2C), 128.4 (2C), 128.3 (2C),

127.3.

(*Z*)-1-bromo-4-styrylbenzene **2h**<sup>8</sup> and (*E*)-1-bromo-4-styrylbenzene **3h**<sup>8</sup>

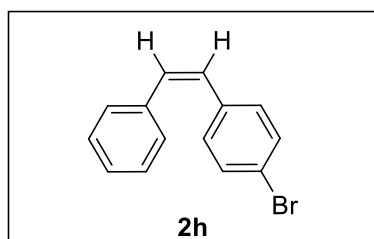

and

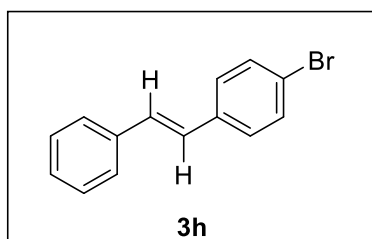

Purified by column chromatography on silica gel (petroleum ether/ethyl acetate /DCM = 200/1/1), total yield: 82% (42.3 mg), *Z:E* = 76:24. **2h**: <sup>1</sup>H NMR (400 MHz, CDCl<sub>3</sub>) δ 7.33 (d, *J* = 8.4 Hz, 2H), 7.25–7.18 (m, 5H), 7.09 (d, *J* = 8.4 Hz, 2H), 6.62 (d, *J* = 12.4 Hz, 1H), 6.49 (d, *J* = 12.0 Hz, 1H). <sup>13</sup>C NMR (100 MHz, CDCl<sub>3</sub>) δ 136.8, 136.1, 131.3 (2C), 131.0, 130.5 (2C), 128.9, 128.8 (2C), 128.3 (2C), 127.3, 120.9. **3h**: <sup>1</sup>H NMR (400 MHz, CDCl<sub>3</sub>) δ 7.51–7.46 (m, 4H), 7.38–7.34 (m, 4H), 7.29–7.25 (m, 1H), 7.10 (d, *J* = 16.0 Hz, 1H), 7.02 (d, *J* = 16.4 Hz, 1H). <sup>13</sup>C NMR (100 MHz, CDCl<sub>3</sub>) δ 136.9, 136.3, 131.8 (2C), 129.4, 128.7 (2C), 128.0 (2C), 127.9, 127.4, 126.5 (2C), 121.3.

(*Z*)-1,2-bis(4-bromophenyl)ethene **2i**<sup>9</sup>

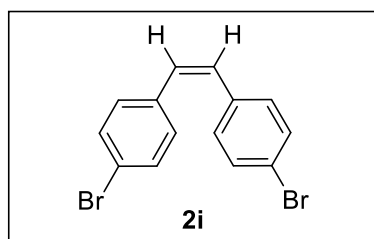

Purified by column chromatography on silica gel (petroleum ether/ethyl acetate /DCM = 200/1/1), total yield: 70% (47.2 mg), *Z:E* = 82:18. **2i**: <sup>1</sup>H NMR (400 MHz, CDCl<sub>3</sub>) δ 7.35 (m, *J* = 8.0 Hz, 4H), 7.08 (d, *J* = 8.4 Hz, 4H), 6.53 (s, 2H). <sup>13</sup>C NMR (100 MHz, CDCl<sub>3</sub>) δ 135.6 (2C), 131.5 (4C), 130.4 (4C), 129.7 (2C), 121.2 (2C).

(*Z*)-1-styryl-4-(trifluoromethyl)benzene **2j**<sup>9</sup>

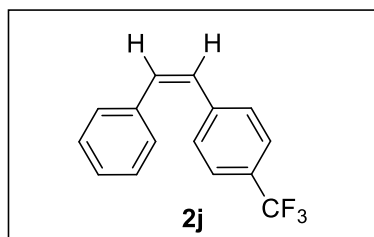

Purified by column chromatography on silica gel (petroleum ether/ethyl acetate/DCM = 200/1/1), total yield: 78% (38.8 mg), *Z:E* = 80:20. **2j**: <sup>1</sup>H NMR (400 MHz, CDCl<sub>3</sub>) δ 7.46 (d, *J* = 8.0 Hz, 2H), 7.40 (d, *J* = 8.4 Hz, 2H), 7.32–7.22 (m, 5H), 6.72 (d, *J* = 12.0 Hz, 1H), 6.59 (d, *J* = 12.0 Hz,

1H).  $^{13}\text{C}$  NMR (100 MHz,  $\text{CDCl}_3$ )  $\delta$  140.9 (q,  $^3J_{\text{C-F}} = 1.2$  Hz), 136.5, 132.3, 129.1 (2C), 128.8 (2C), 128.7, 128.4 (2C), 127.6 (2C), 125.1 (q,  $^3J_{\text{C-F}} = 3.6$  Hz, 2C), 124.2 (q,  $^1J_{\text{C-F}} = 270.4$  Hz).  $^{19}\text{F}$  NMR (376 MHz,  $\text{CDCl}_3$ ):  $\delta$  -62.5.

(*Z*)-1-styryl-4-(trifluoromethoxy)benzene **2k**<sup>10</sup>

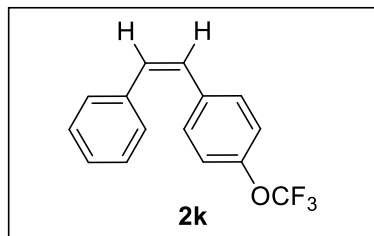

Purified by column chromatography on silica gel (petroleum ether/ethyl acetate/DCM = 200/1/1), total yield: 63% (33.2 mg), *Z:E* = 80:20. **2k**:  $^1\text{H}$  NMR (400 MHz,  $\text{CDCl}_3$ )  $\delta$  7.26–7.23 (m, 7H), 7.05 (d,  $J = 8.0$  Hz, 2H), 6.65 (d,  $J = 12.0$  Hz, 1H), 6.55 (d,  $J = 12.4$  Hz, 1H).  $^{13}\text{C}$  NMR (100 MHz,  $\text{CDCl}_3$ )  $\delta$  148.0, 136.8, 135.8, 131.1, 130.2 (2C), 128.8 (2C), 128.7, 128.4

(2C), 127.4, 120.6 (2C), 120.4 (d,  $^1J_{\text{C-F}} = 255.4$  Hz).  $^{19}\text{F}$  NMR (376 MHz,  $\text{CDCl}_3$ ):  $\delta$  -57.8.

(*Z*)-methyl-4-styrylbenzoate **2l**<sup>5</sup> and (*E*)-methyl-4-styrylbenzoate **3l**<sup>5</sup>

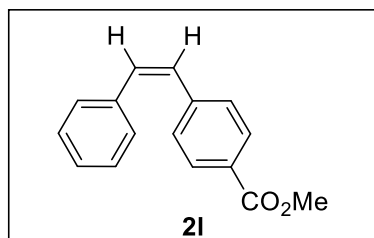

and

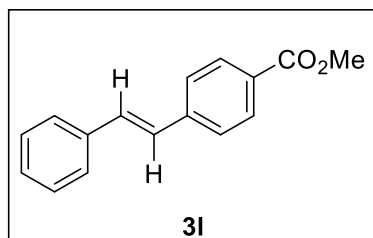

Purified by column chromatography on silica gel (petroleum ether/ethyl acetate = 50/1), total yield: 91% (43.2 mg), *Z:E* = 75:25. **2l**:  $^1\text{H}$  NMR (400 MHz,  $\text{CDCl}_3$ )  $\delta$  7.88 (d,  $J = 8.4$  Hz, 2H), 7.29 (d,  $J = 8.4$  Hz, 2H), 7.21 (s, 5H), 6.70 (d,  $J = 12.4$  Hz, 1H), 6.59 (d,  $J = 12.0$  Hz, 1H), 3.88 (s, 3H).  $^{13}\text{C}$  NMR (100 MHz,  $\text{CDCl}_3$ )  $\delta$  166.8, 142.0, 136.6, 132.2, 129.5 (2C), 129.2, 128.8 (4C), 128.5, 128.3 (2C), 127.5, 52.0. **3l**:  $^1\text{H}$  NMR (400 MHz,  $\text{CDCl}_3$ )  $\delta$  8.03 (d,  $J = 8.4$  Hz, 2H), 7.58–7.53 (m, 4H), 7.38 (t,  $J = 7.6$  Hz, 2H), 7.31 (d,  $J = 7.2$  Hz, 1H), 7.22 (d,  $J = 16.4$  Hz, 1H), 7.13 (d,  $J = 16.0$  Hz, 1H), 3.92 (s, 3H).  $^{13}\text{C}$  NMR (100 MHz,  $\text{CDCl}_3$ )  $\delta$  166.9, 141.8, 136.7, 131.2, 130.0 (2C), 128.9, 128.8 (2C), 128.2, 127.5, 126.8 (2C), 126.3 (2C), 52.1.

(*Z*)-1-methoxy-3-styrylbenzene **2m**<sup>8</sup>

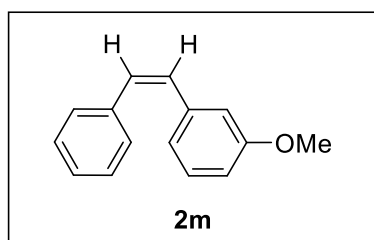

Purified by column chromatography on silica gel (petroleum ether/ethyl acetate /DCM = 200/1/1), total yield: 84% (35.4 mg), *Z:E* = 85:15. **2m**:  $^1\text{H}$  NMR (400 MHz,  $\text{CDCl}_3$ )  $\delta$  7.27–7.12 (m, 6H), 6.83 (d,  $J = 7.6$  Hz, 1H), 6.78 (s, 1H), 6.75–6.73 (m, 1H), 6.61 (d,  $J = 12.0$  Hz, 1H), 6.56 (d,  $J = 12.4$  Hz, 1H), 3.63 (s, 3H).  $^{13}\text{C}$  NMR (100 MHz,  $\text{CDCl}_3$ )  $\delta$  159.3,

138.5, 137.3, 130.5, 130.1, 129.2, 128.9 (2C), 128.2 (2C), 127.1, 121.5, 113.7, 113.3, 55.0.

(Z)-1-fluoro-2-styrylbenzene **2o**<sup>10</sup>

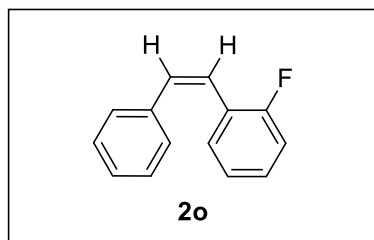

Purified by column chromatography on silica gel (petroleum ether/ethyl acetate/DCM = 200/1/1), total yield: 55% (21.6 mg), *Z:E* > 95:5. **2o**: <sup>1</sup>H NMR (400 MHz, CDCl<sub>3</sub>) δ 7.24–7.18 (m, 7H), 7.03 (t, *J* = 8.8 Hz, 1H), 6.92 (t, *J* = 7.6 Hz, 1H), 6.71 (d, *J* = 12.4 Hz, 1H), 6.61 (d, *J* = 12.4 Hz, 1H). <sup>13</sup>C NMR (100 MHz, CDCl<sub>3</sub>) δ 160.3 (d, <sup>1</sup>*J*<sub>C-F</sub> = 246.1 Hz), 136.8, 132.2, 130.5 (d, <sup>4</sup>*J*<sub>C-F</sub> = 3.5 Hz), 128.9 (d, <sup>3</sup>*J*<sub>C-F</sub> = 7.1 Hz), 128.7 (2C), 128.2 (2C), 127.3, 125.0 (d, <sup>2</sup>*J*<sub>C-F</sub> = 24.4 Hz), 123.6 (d, <sup>4</sup>*J*<sub>C-F</sub> = 3.4 Hz), 122.6 (d, <sup>4</sup>*J*<sub>C-F</sub> = 3.2 Hz), 115.6 (d, <sup>2</sup>*J*<sub>C-F</sub> = 21.8 Hz). <sup>19</sup>F NMR (376 MHz, CDCl<sub>3</sub>): δ -114.7.

(Z)-1-chloro-2-styrylbenzene **2p**<sup>11</sup>

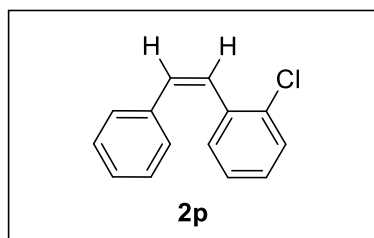

Purified by column chromatography on silica gel (petroleum ether/ethyl acetate/DCM = 200/1/1), total yield: 51% (21.7 mg), *Z:E* > 95:5. **2p**: <sup>1</sup>H NMR (400 MHz, CDCl<sub>3</sub>) δ 7.39 (d, *J* = 7.2 Hz, 1H), 7.20–7.12 (m, 7H), 7.03–6.99 (m, 1H), 6.70 (d, *J* = 12.0 Hz, 1H), 6.66 (d, *J* = 12.0 Hz, 1H). <sup>13</sup>C NMR (100 MHz, CDCl<sub>3</sub>) δ 136.4, 136.0, 133.6, 131.7, 130.7, 129.5, 128.9 (2C), 128.5, 128.1 (2C), 127.3, 127.2, 126.3.

(Z)-1-bromo-2-styrylbenzene **2q**<sup>12</sup>

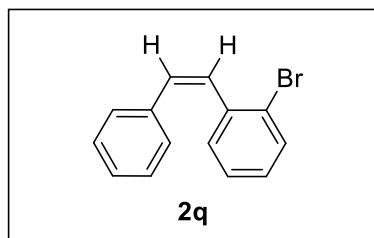

Purified by column chromatography on silica gel (petroleum ether/ethyl acetate/DCM = 200/1/1), total yield: 59% (30.6 mg), *Z:E* > 95:5. **2q**: <sup>1</sup>H NMR (400 MHz, CDCl<sub>3</sub>) δ 7.61–7.58 (m, 1H), 7.18–7.13 (m, 6H), 7.10–7.06 (m, 2H), 6.68 (d, *J* = 12.0 Hz, 1H), 6.61 (d, *J* = 12.4 Hz, 1H). <sup>13</sup>C NMR (100 MHz, CDCl<sub>3</sub>) δ 137.9, 136.3, 132.7, 131.3, 130.8, 129.4, 129.0 (2C), 128.6, 128.1 (2C), 127.3, 127.0, 123.9.

(Z)-2-(4-methoxystyryl)phenol **2r**<sup>13</sup>

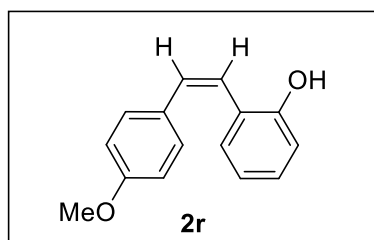

Purified by column chromatography on silica gel (petroleum ether/ethyl acetate = 20/1), total yield: 95% (42.8 mg), *Z:E* > 95:5. **2r**: <sup>1</sup>H NMR (400 MHz, CDCl<sub>3</sub>) δ 7.21–7.12 (m, 4H), 6.90–6.85 (m, 2H), 6.74–6.72 (m, 2H), 6.68 (d, *J* = 12.0 Hz, 1H), 6.44 (d, *J* = 12.4 Hz, 1H), 5.20 (s, 1H), 3.73 (s, 3H). <sup>13</sup>C NMR (100 MHz, CDCl<sub>3</sub>) δ 159.3, 152.3, 132.4, 130.0 (2C), 129.6, 128.8, 128.4, 124.0, 122.2, 120.6, 115.6, 113.8 (2C), 55.1.

(Z)-2-methyl-5-styrylthiophene **2s**<sup>8</sup> and (E)-2-methyl-5-styrylthiophene **3s**<sup>8</sup>

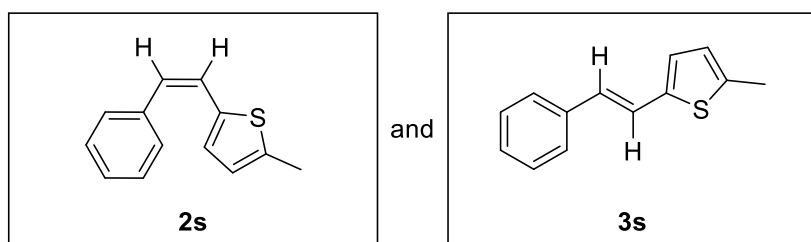

Purified by column chromatography on silica gel (petroleum ether/ethyl acetate /DCM = 200/1/1), total yield: 92% (36.7 mg), *Z:E* = 60:40. **2s**:  $^1\text{H}$  NMR (400 MHz,  $\text{CDCl}_3$ )  $\delta$  7.36–7.25 (m, 5H), 6.77 (d,  $J$  = 3.2 Hz, 1H), 6.61 (d,  $J$  = 12.0 Hz, 1H), 6.54–6.53 (m, 1H), 6.47 (d,  $J$  = 12.0 Hz, 1H), 2.34 (s, 3H).  $^{13}\text{C}$  NMR (100 MHz,  $\text{CDCl}_3$ )  $\delta$  140.2, 137.7, 137.5, 128.8 (2C), 128.6, 128.4 (2C), 127.4, 127.3, 124.6, 123.7, 15.3. **3s**:  $^1\text{H}$  NMR (400 MHz,  $\text{CDCl}_3$ )  $\delta$  7.43 (d,  $J$  = 7.6 Hz, 2H), 7.32 (t,  $J$  = 7.6 Hz, 2H), 7.23 (d,  $J$  = 8.4 Hz, 1H), 7.14 (d,  $J$  = 16.0 Hz, 1H), 6.84 (d,  $J$  = 3.2 Hz, 1H), 6.79 (d,  $J$  = 16.0 Hz, 1H), 6.64 (d,  $J$  = 2.4 Hz, 1H), 2.48 (s, 3H).  $^{13}\text{C}$  NMR (100 MHz,  $\text{CDCl}_3$ )  $\delta$  140.8, 139.3, 137.2, 128.6 (2C), 127.3, 127.0, 126.4, 126.1 (2C), 125.7, 122.1, 15.6.

(*Z*)-2-methyl-4-phenylbut-3-en-2-ol **2t**<sup>14</sup>

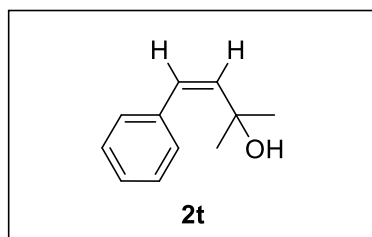

Purified by column chromatography on silica gel (petroleum ether/ethyl acetate = 10/1), total yield: 52% (16.7 mg), *Z:E* > 95:5. **2t**:  $^1\text{H}$  NMR (400 MHz,  $\text{CDCl}_3$ )  $\delta$  7.36–7.30 (m, 4H), 7.25 (d,  $J$  = 8.0 Hz, 1H), 6.46 (d,  $J$  = 12.8 Hz, 1H), 5.76 (d,  $J$  = 12.8 Hz, 1H), 1.62 (s, 1H), 1.36 (s, 6H).  $^{13}\text{C}$  NMR (100 MHz,  $\text{CDCl}_3$ )  $\delta$  139.3, 137.5, 129.0 (2C), 128.0 (2C), 127.8,

126.9, 72.1, 31.1 (2C).

## 8. Mechanistic Studies.

### 1) Radical trap experiment

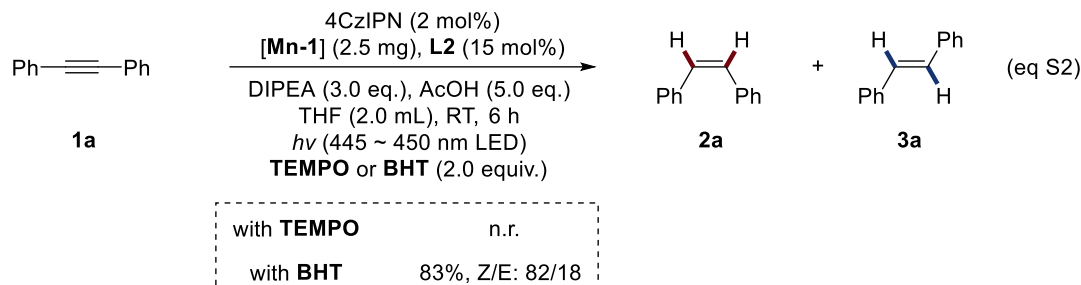

Following the general procedure, TEMPO or BHT (0.4 mmol, 2.0 equiv.) was added as the additive, and the crude  $^1\text{H}$  NMR yields were recorded when the reactions were finished (eq S2). Notably, the addition of TEMPO led to the totally inhibition of the transformation. However, BHT only slightly reduced the catalyst activity, delivering alkenes in total yield of 83% with 82/18 Z/E stereoselectivity. Since radical traps might react with metal-hydride to inhibit the reaction, we thus deduced that radical species might not involve in the catalytic cycle.

### 2) Mn-H detection reaction

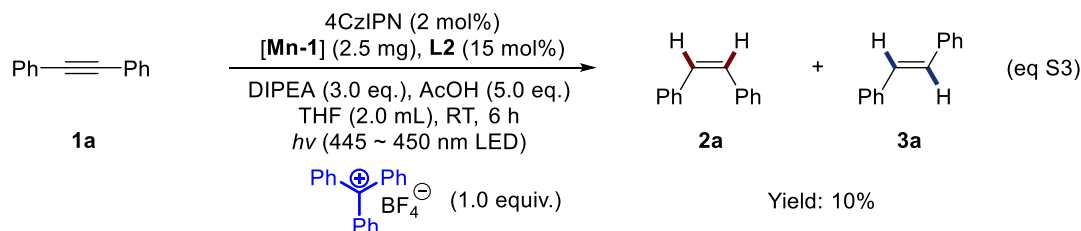

To confirm the involvement of Mn-H species, triphenylcarbenium tetrafluoroborate (0.2 mmol, 1.0 equiv) was added to the model reaction as the additive (eq S3). The reaction yield was sharply decreased to 10%, suggesting the involvement of Mn-H species in catalytic cycles.

### 3) Deuterium-labelling experiments

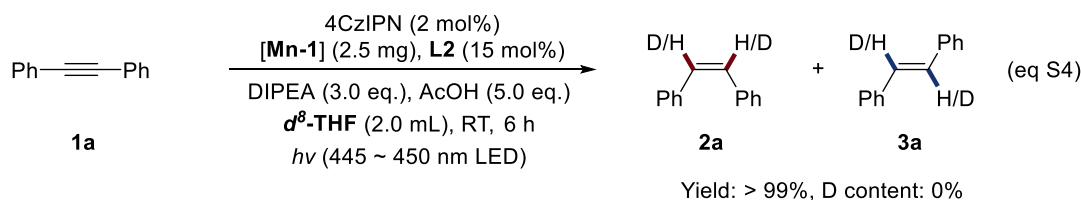



To confirm the hydrogen source of the semi-hydrogenation reaction, deuterium-labelling experiments was conducted by using  $d^8$ -THF as the solvent (eq S5). After finishing irradiation, the reaction yield was analysed by  $^1\text{H}$  NMR spectroscopy immediately. The deuterium incorporation was determined by  $^1\text{H}$  NMR spectroscopy of isolated product. This result shows that no deuterium incorporation was observed (see Figure S5).

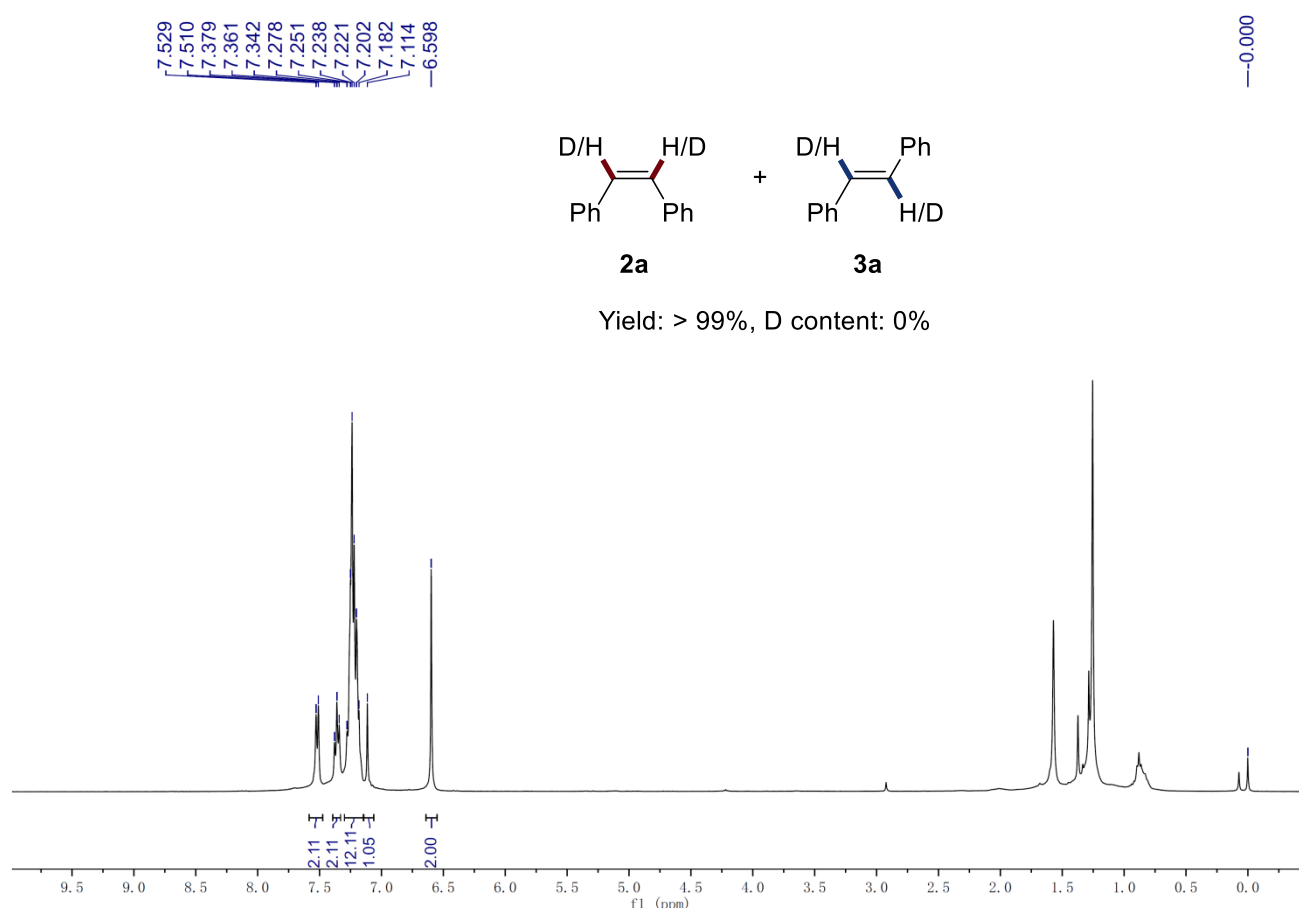

**Figure S5.**  $^1\text{H}$  NMR spectrum of deuterium labeling reaction by using  $d^8$ -THF as the solvent.

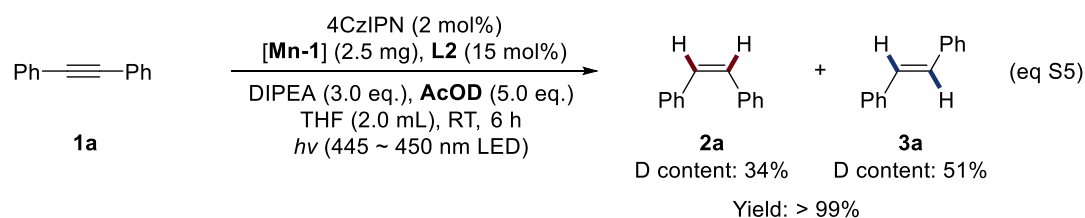

Next, another deuterium-labelling experiment was conducted by using AcOD as the proton additive (eq S5).  $^1\text{H}$  NMR spectroscopy analysis showed that 34% of D was cooperated in Z-alkene **2a**, and 51% of D was cooperated in E-alkene **3a** (see Figure S6). The reason of different deuterium content may arise from the Mn-H catalyzed Z to E isomerization reaction.



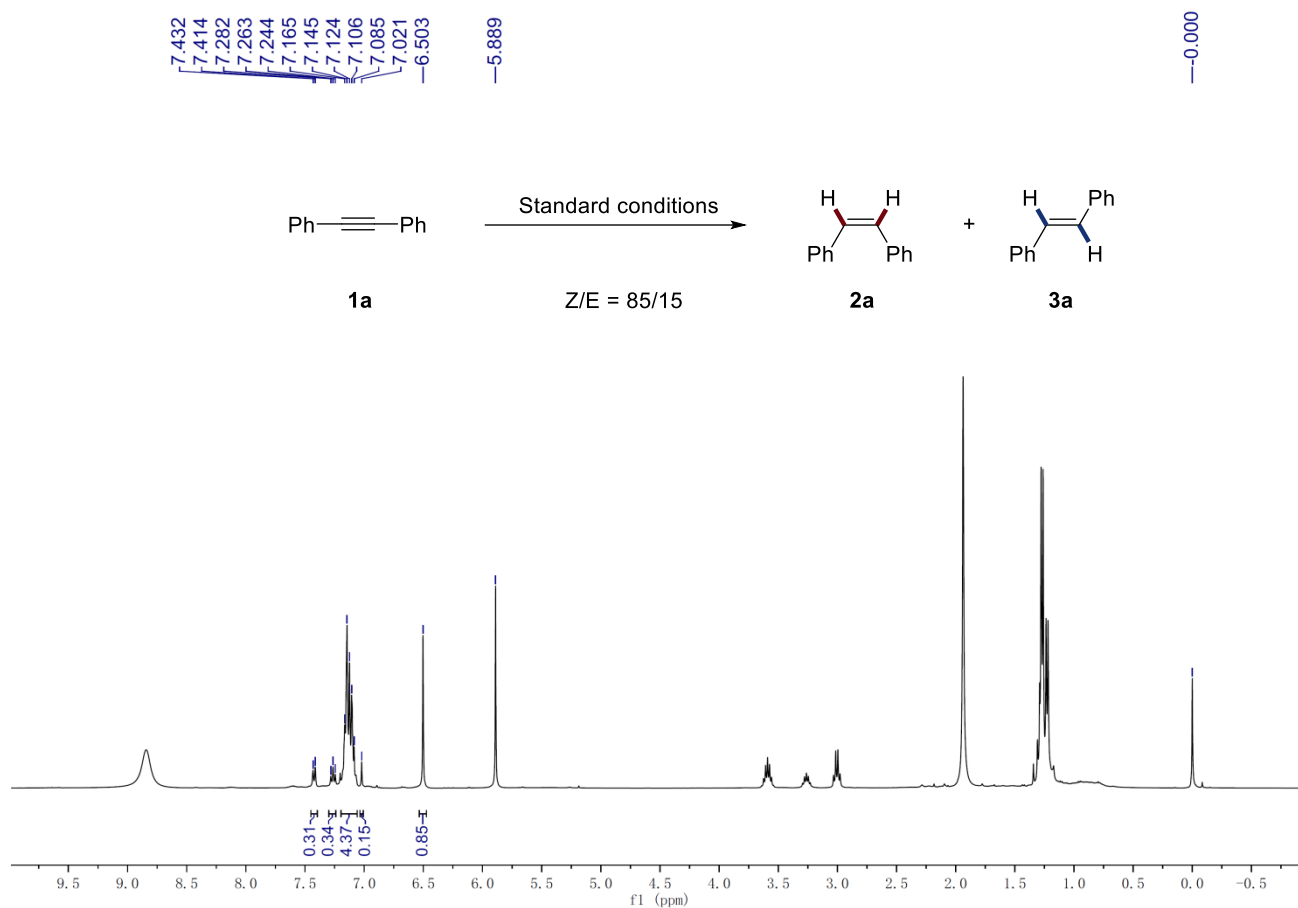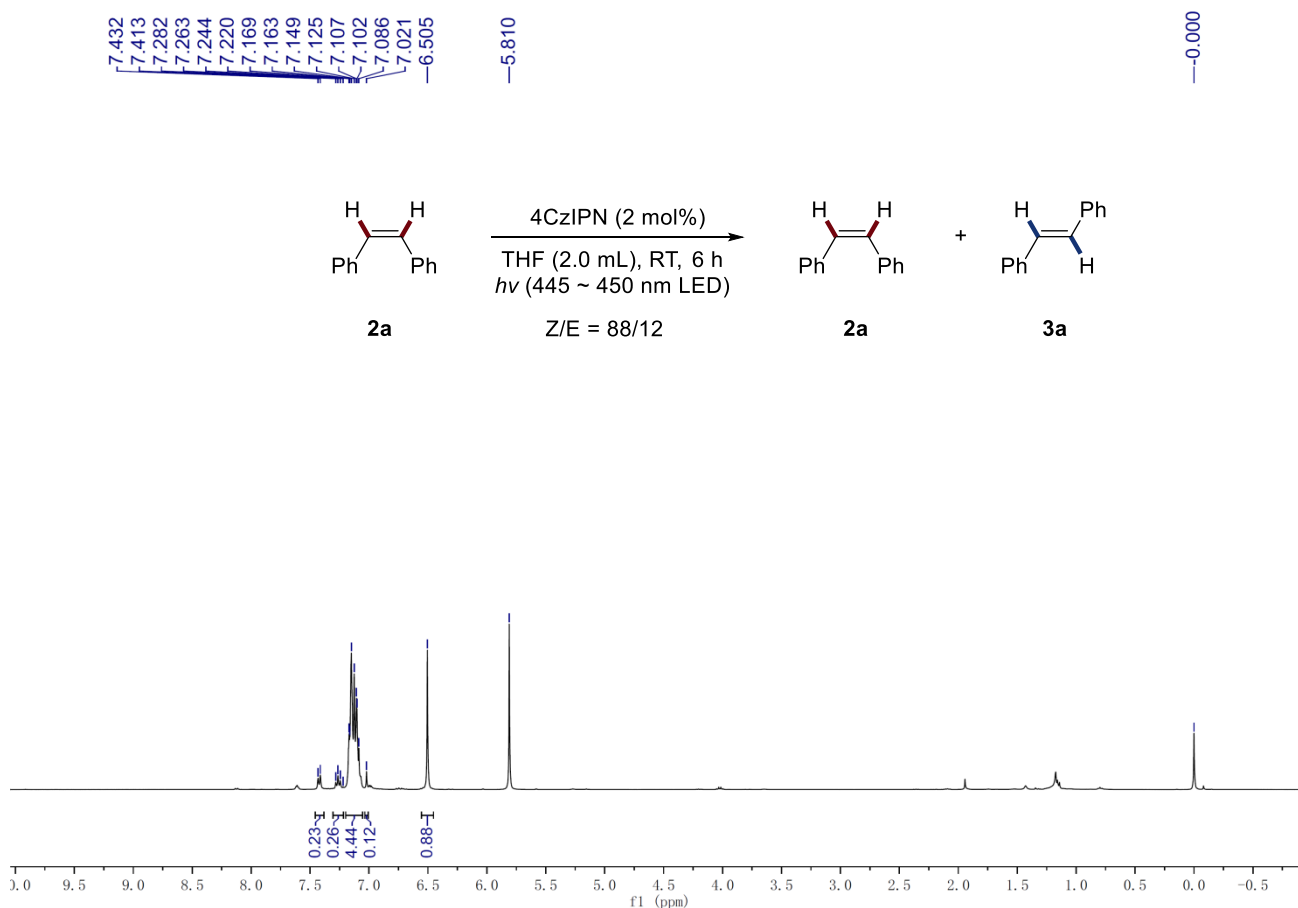

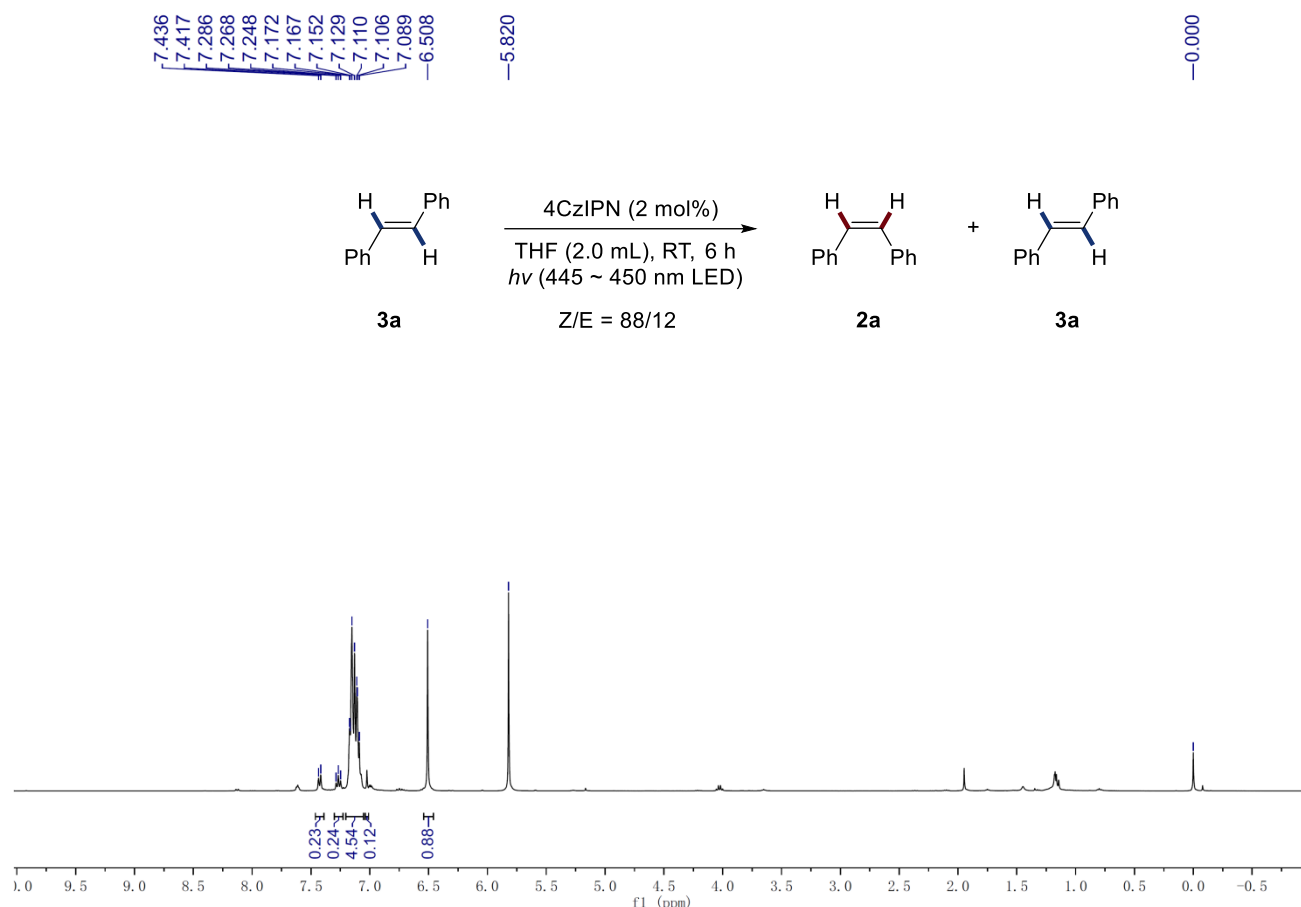

**Figure S7.** <sup>1</sup>H NMR spectra of model reaction and isomerization reactions.

## 5) Emission Quenching Experiments

Emission intensities were recorded using a spectrofluorimeter. All 4CzIPN solutions were excited at 400 nm and the emission intensity at 540 nm was observed. THF was selected as solvent, and the solvent was degassed with a stream of argon for 30 min. In a typical experiment, the emission spectrum of the sample was collected after the sample was degassed with a stream of argon for 15 minutes. The sample of Mn complex was prepared by stirring the mixture of **[Mn-1]** and **L2** (molar ratio of **[Mn-1]**/**L2** = 1/2) in THF under Ar atmosphere for 2 h. The molecular weight of **[Mn-1]** was roughly estimated the same as that of Mn(acac)<sub>2</sub>•2H<sub>2</sub>O. Then, the mixture was diluted to the required concentration. In the emission quenching experiments, the emission spectrum of a 5×10<sup>-6</sup> M solution of 4CzIPN in THF was firstly collected. Then, appropriate amount of quencher was added to the measured solution and the emission spectrum of the sample was collected.

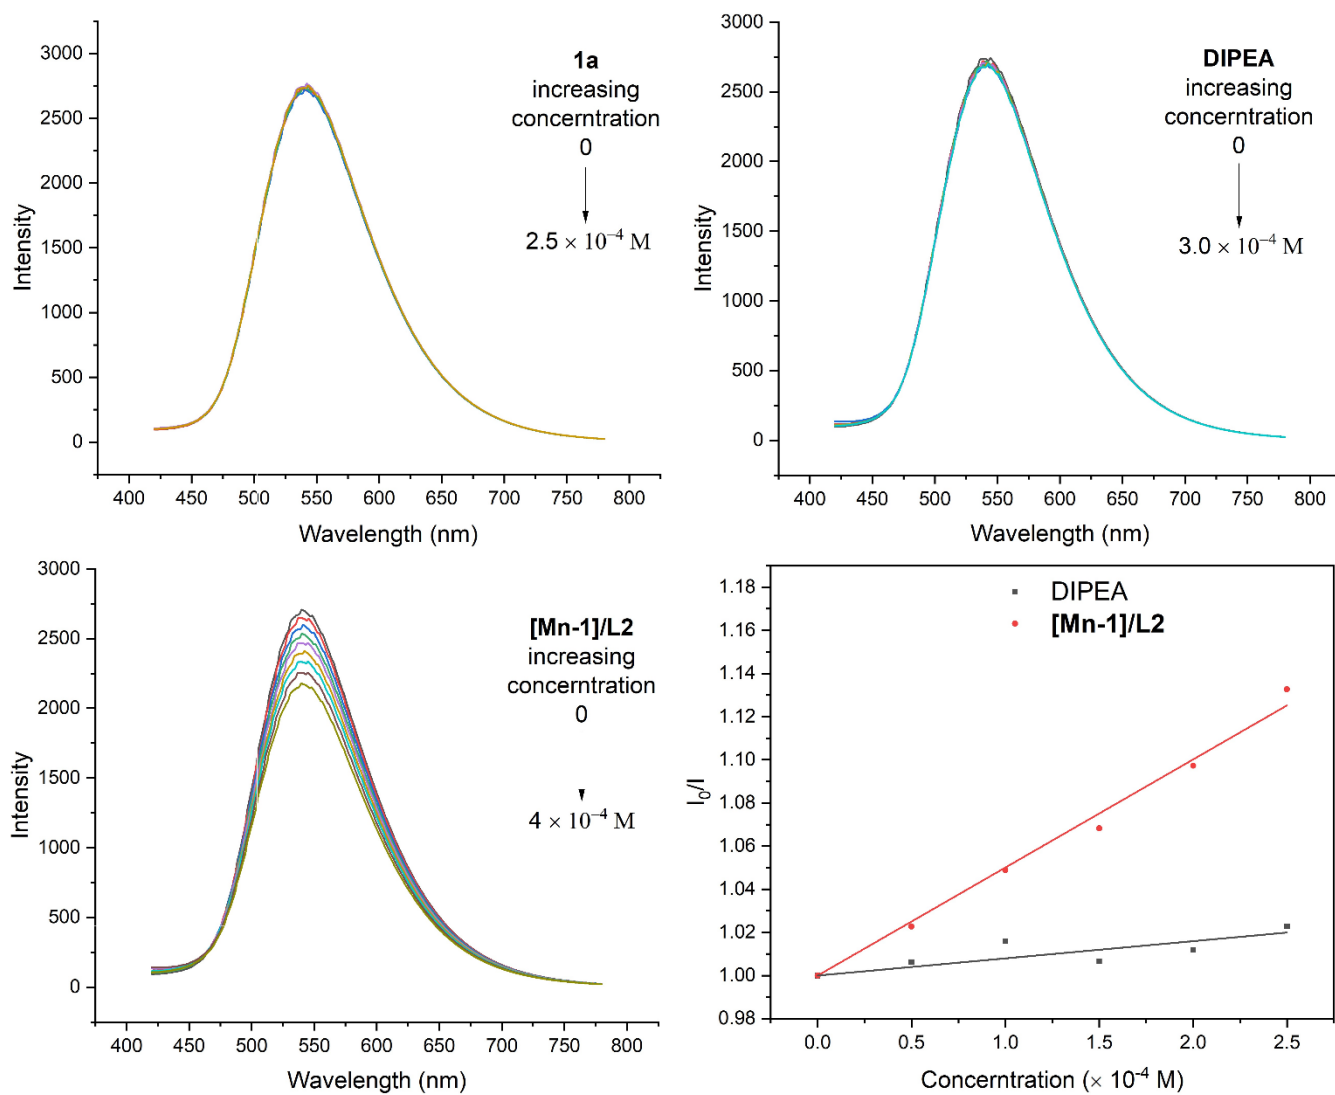

**Figure S8.** Emission-quenching experiments of **1a**, DIPEA, and **[Mn-1]/L2**, and the Stern-Volmer plot of DIPEA and Mn complex.

## 6) Light on/off Experiments

**Table S3.** Light on/off experiments of model reaction.

| <div>Ph——Ph</div> <div><b>1a</b></div> | <div>4CzIPN (2 mol%)<br/>[Mn-1] (2.5 mg), <b>L2</b> (15 mol%)<br/>DIPEA (3.0 eq.), AcOH (5.0 eq.)<br/>THF (2.0 mL), RT, 6 h<br/><i>hν</i> (445 ~ 450 nm LED)</div> <div></div> | <div></div> <div><b>2a</b></div> | +  | <div></div> <div><b>3a</b></div> |  |
|----------------------------------------|--------------------------------------------------------------------------------------------------------------------------------------------------------------------------------|----------------------------------|----|----------------------------------|--|
| entry <sup>[a]</sup>                   |                                                                                                                                                                                | time (h.)                        |    | yield (%)                        |  |
|                                        |                                                                                                                                                                                |                                  |    | <b>2a + 3a</b>                   |  |
| 1                                      | 0                                                                                                                                                                              |                                  | 2  | 51                               |  |
| 2                                      | 2                                                                                                                                                                              |                                  | 4  | 50                               |  |
| 3                                      | 4                                                                                                                                                                              |                                  | 6  | 80                               |  |
| 4                                      | 6                                                                                                                                                                              |                                  | 8  | 80                               |  |
| 5                                      | 8                                                                                                                                                                              |                                  | 10 | 94                               |  |
| 6                                      | 10                                                                                                                                                                             |                                  | 12 | 95                               |  |

<sup>[a]</sup> Reaction condition: **1a** (0.2 mmol), 4CzIPN (2 mol%), [**Mn-1**] (2.5 mg), 5,5'-dimethyl-2,2'-bipyridine (**L2**, 15 mol%), DIPEA (3.0 equiv.), AcOH (5.0 equiv.) in THF (2.0 mL), irradiation with blue LEDs (445~450 nm, 10 W), <sup>1</sup>H NMR yield was reported using Cl<sub>2</sub>CHCHCl<sub>2</sub> as an internal standard.

## 7) Cyclic Voltammetry (CV) Experiments

For the electrochemical measurements, a three-electrode system connected to an electrochemical station was used. The reference electrode, Ag/AgNO<sub>3</sub> in 0.1 M AgNO<sub>3</sub>, was calibrated versus Fc<sup>+</sup>/Fc<sup>0</sup> using the same experimental conditions as for the sample. A glassy carbon electrode was used as working electrode. And a Pt wire was used as counter electrode. All electrochemical measurements were performed in CH<sub>3</sub>CN under dry argon atmosphere.

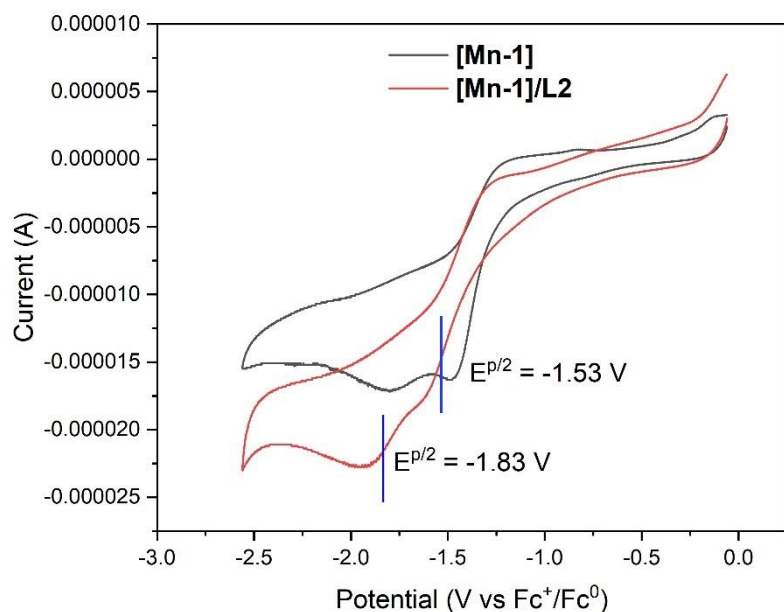

**Figure S9.** Cyclic voltammogram (CV) of 2 mM **[Mn-1]** and **[Mn-1]/L2** in 0.1 M *n*-Bu<sub>4</sub>PF<sub>6</sub> CH<sub>3</sub>CN solution under Ar. The relative molecular mass of **[Mn-1]** was roughly estimated the same as that of Mn(acac)<sub>2</sub>•2H<sub>2</sub>O. Conditions: working electrode: glassy carbon electrode; reference electrode: Ag<sup>+</sup>/Ag; scan rate = 100 mV/s. By comparing with the CV plot of **[Mn-1]**, we located the two reduction peaks for **[Mn-1]/L2**, which were assigned as  $E^{p/2} = -1.13$  V vs. SCE;  $E^{p/2} = -1.43$  V vs. SCE.

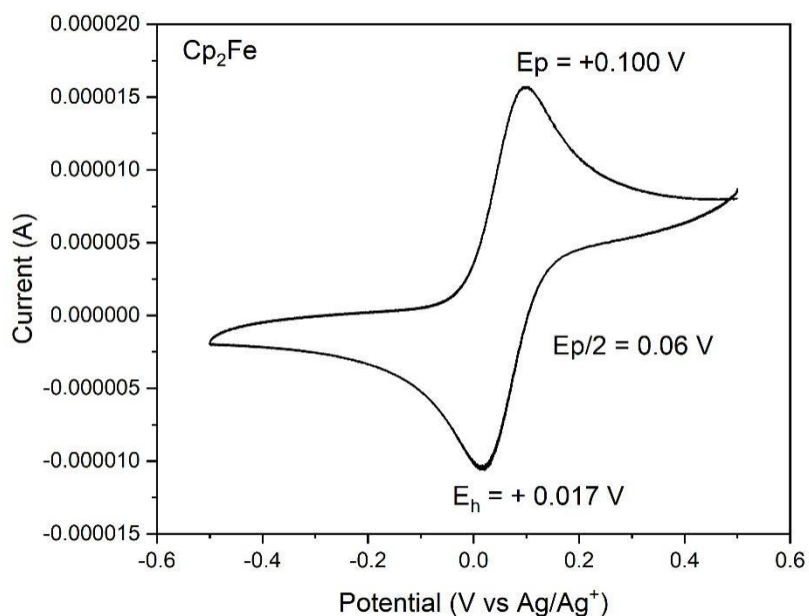

**Figure S10.** Cyclic voltammogram (CV) of 2 mM Cp<sub>2</sub>Fe in 0.1 M *n*-Bu<sub>4</sub>PF<sub>6</sub> CH<sub>3</sub>CN solution under Ar with scan rate 100 mV/s.

## 9. Possible reaction mechanism

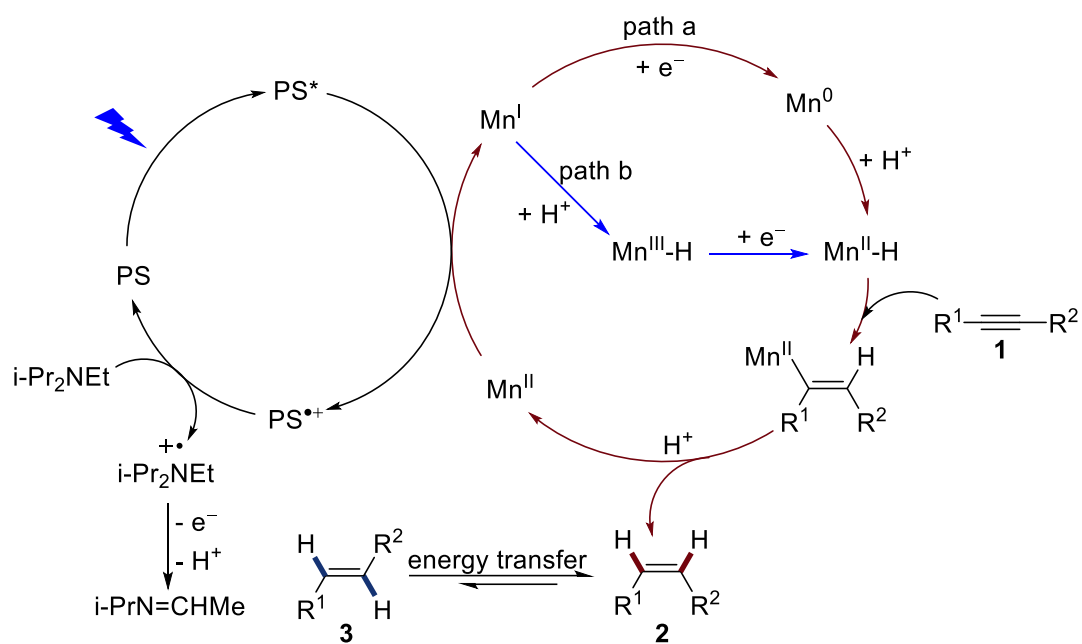

**Scheme S1.** Possible reaction mechanism.



## 10. Spectrum

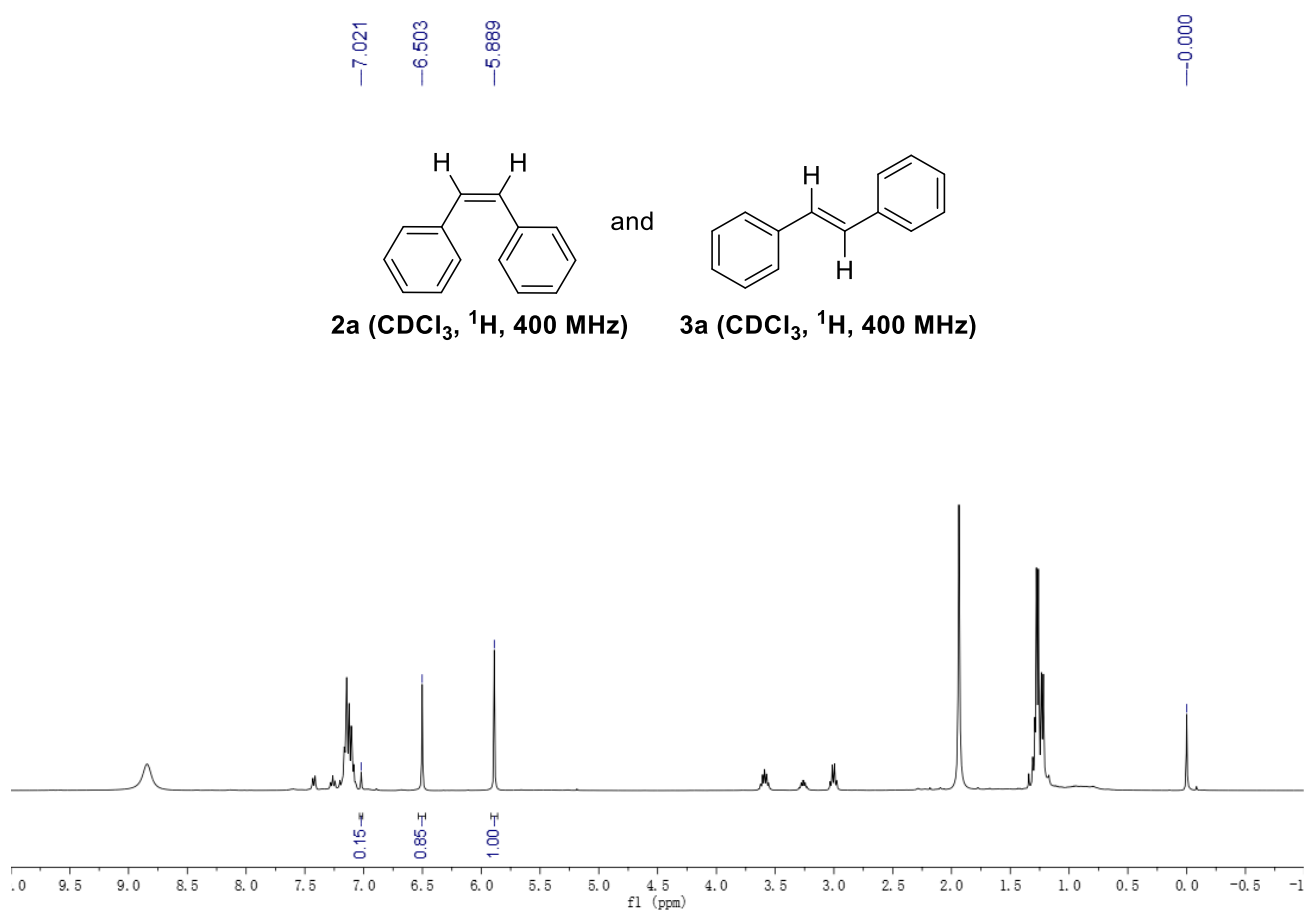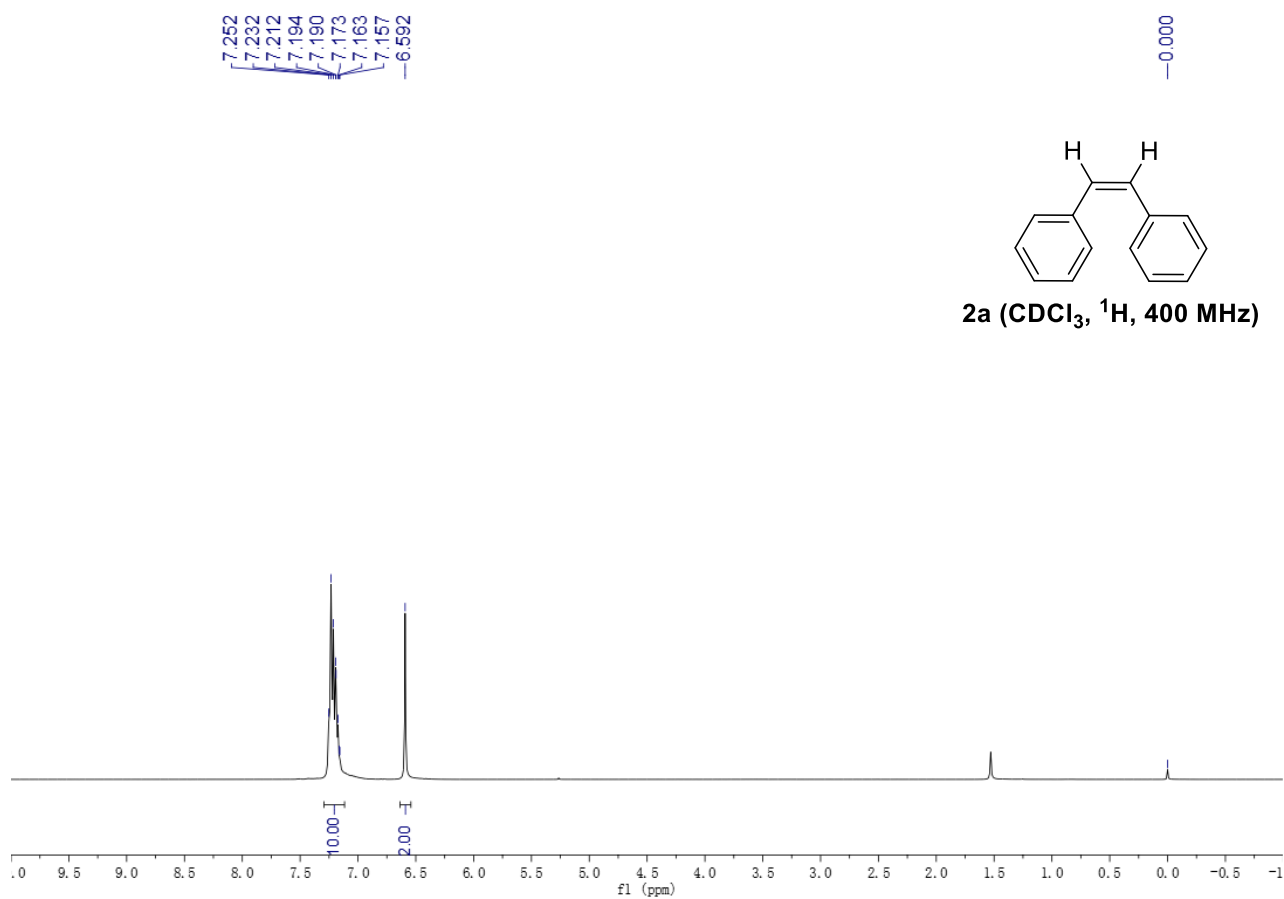

137.233  
130.234  
128.853  
128.184  
127.064

77.318  
77.000  
76.683

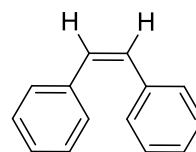

2a (CDCl<sub>3</sub>, <sup>13</sup>C, 100 MHz)

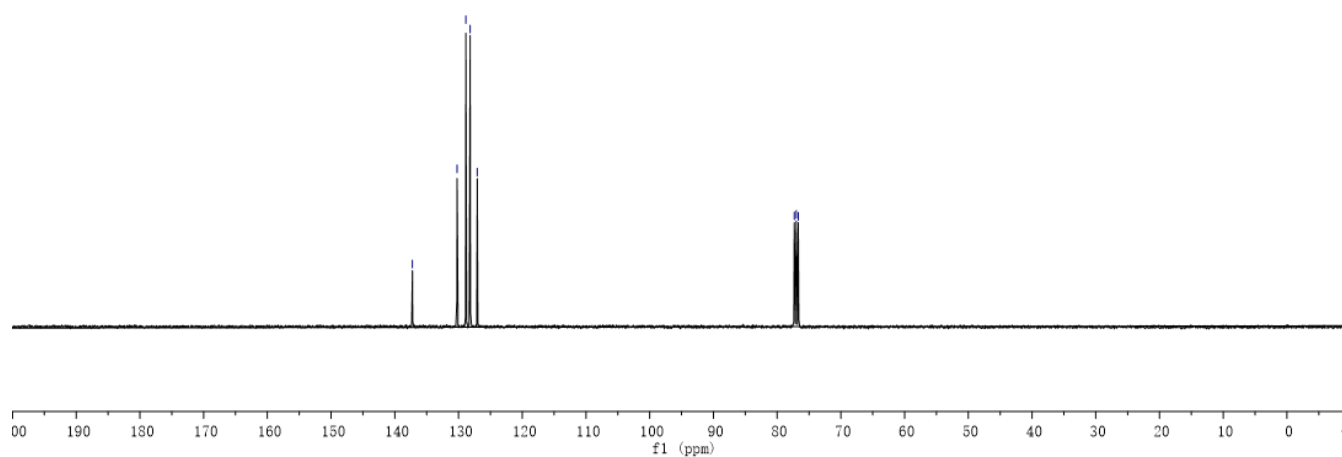

7.514  
7.495  
7.365  
7.347  
7.328  
7.265  
7.247  
7.228  
7.215  
7.101

0.000

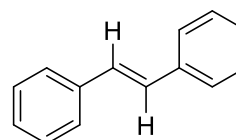

3a (CDCl<sub>3</sub>, <sup>1</sup>H, 400 MHz)

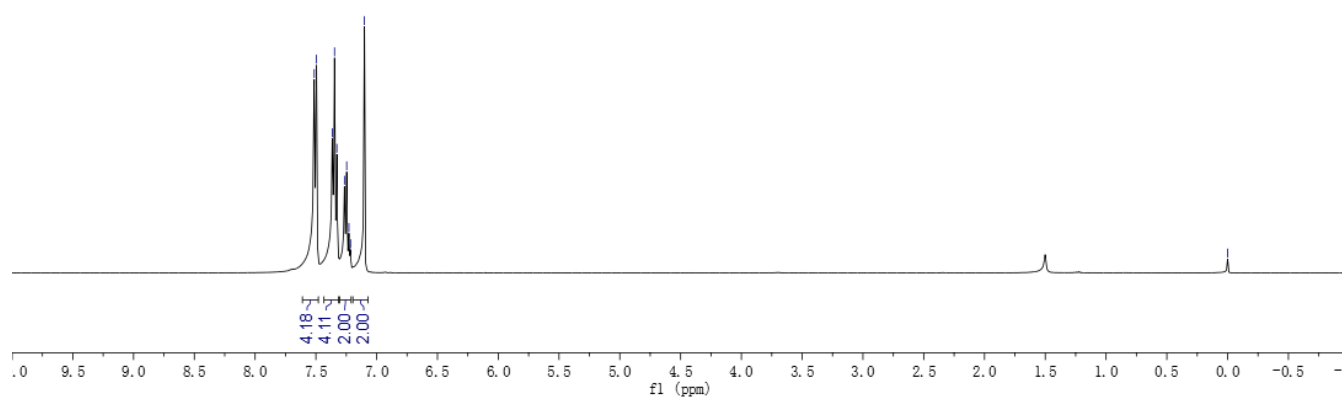

137.369  
128.729  
128.654  
127.589  
126.505

77.317  
77.000  
76.683

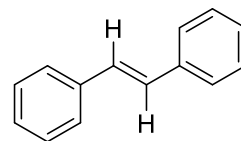

3a (CDCl<sub>3</sub>, <sup>13</sup>C, 100 MHz)

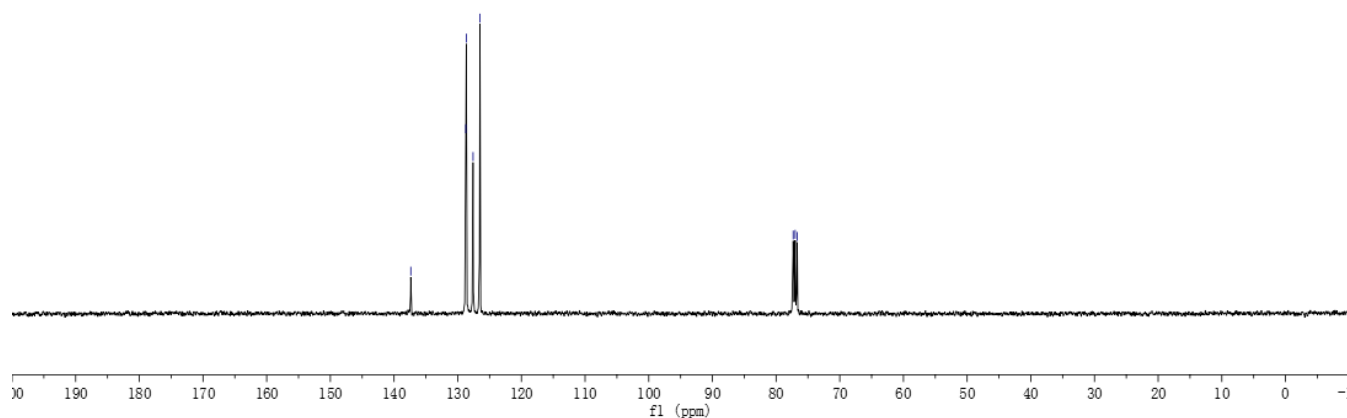

7.525  
7.520  
7.506  
7.485

6.544

5.968

0.000

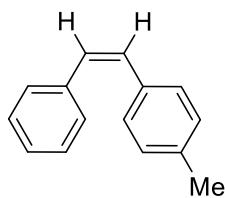

and

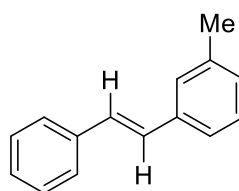

2b (CDCl<sub>3</sub>, <sup>1</sup>H, 400 MHz) 3b (CDCl<sub>3</sub>, <sup>1</sup>H, 400 MHz)

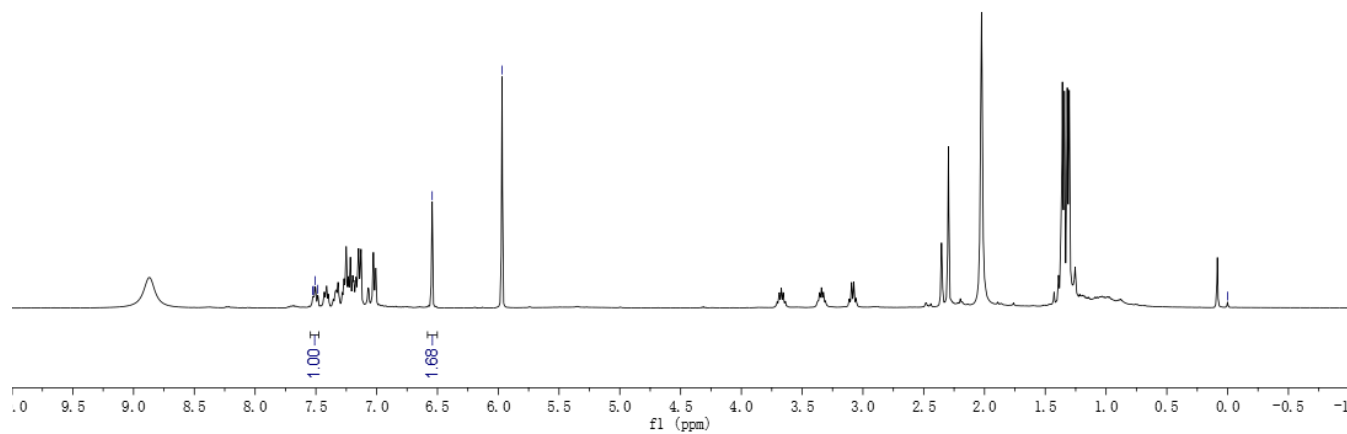

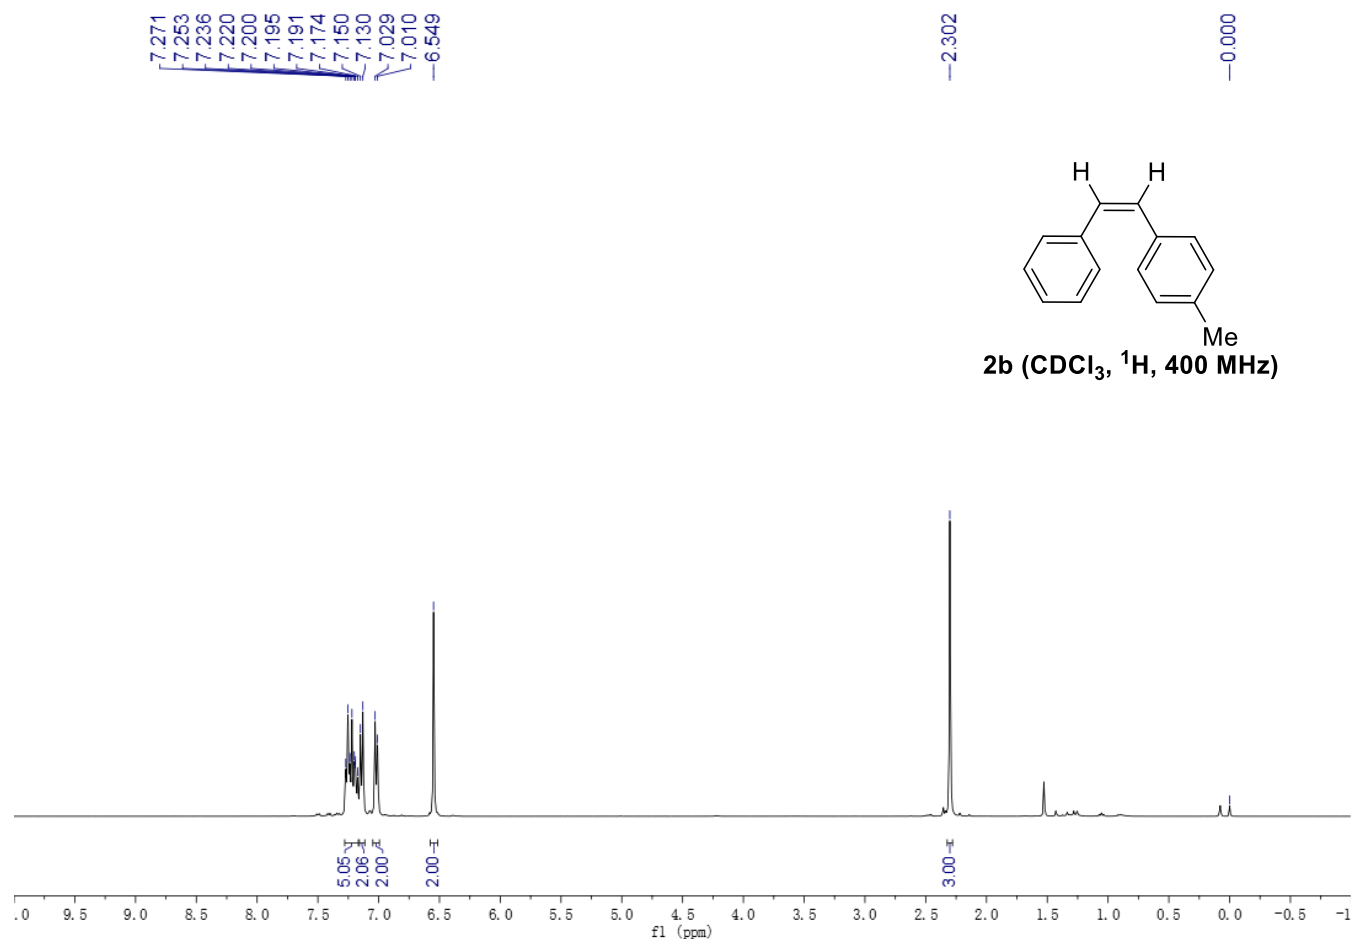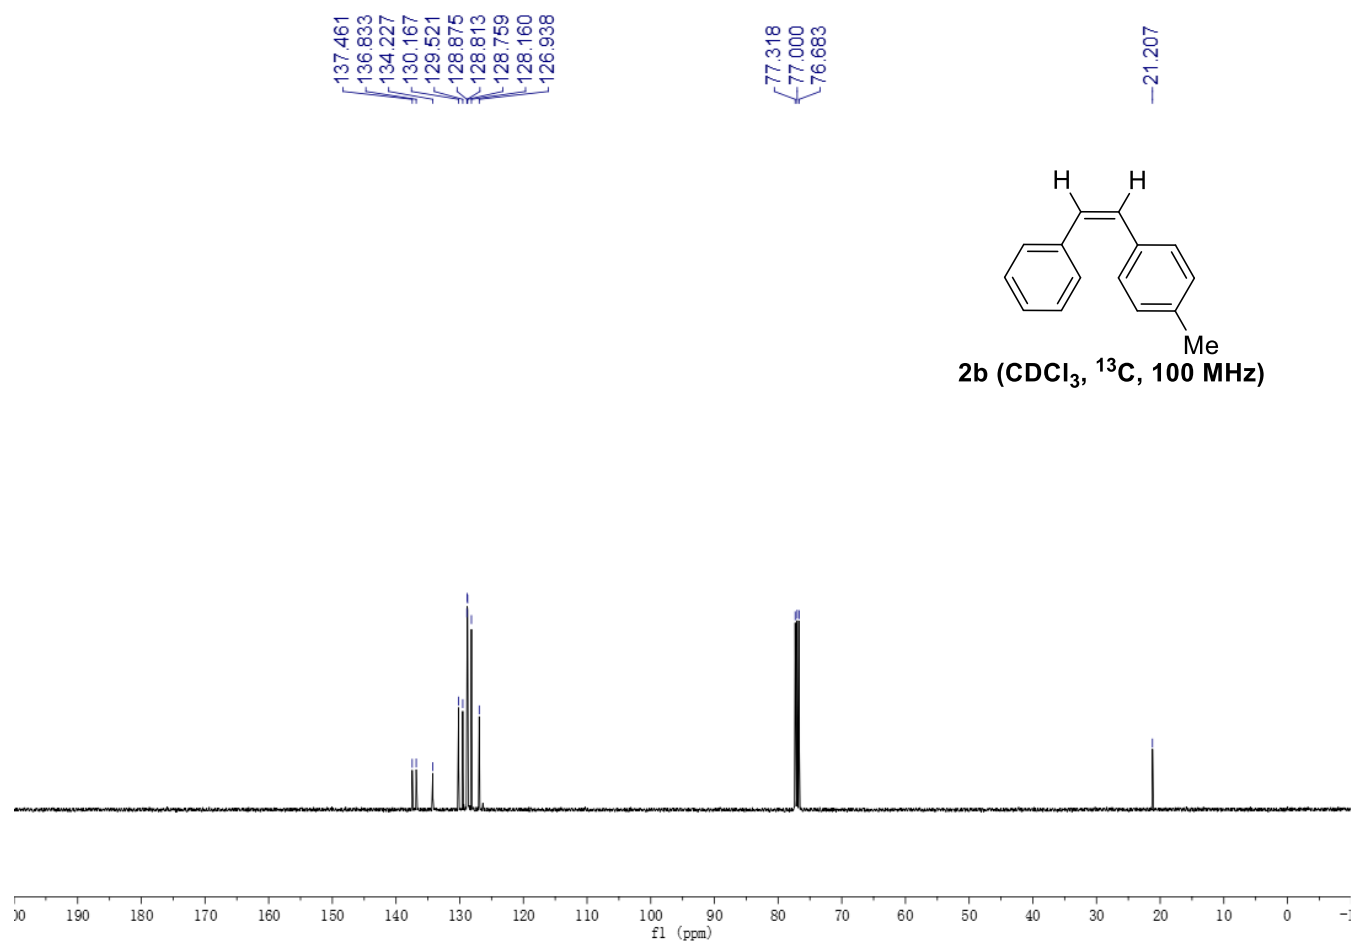

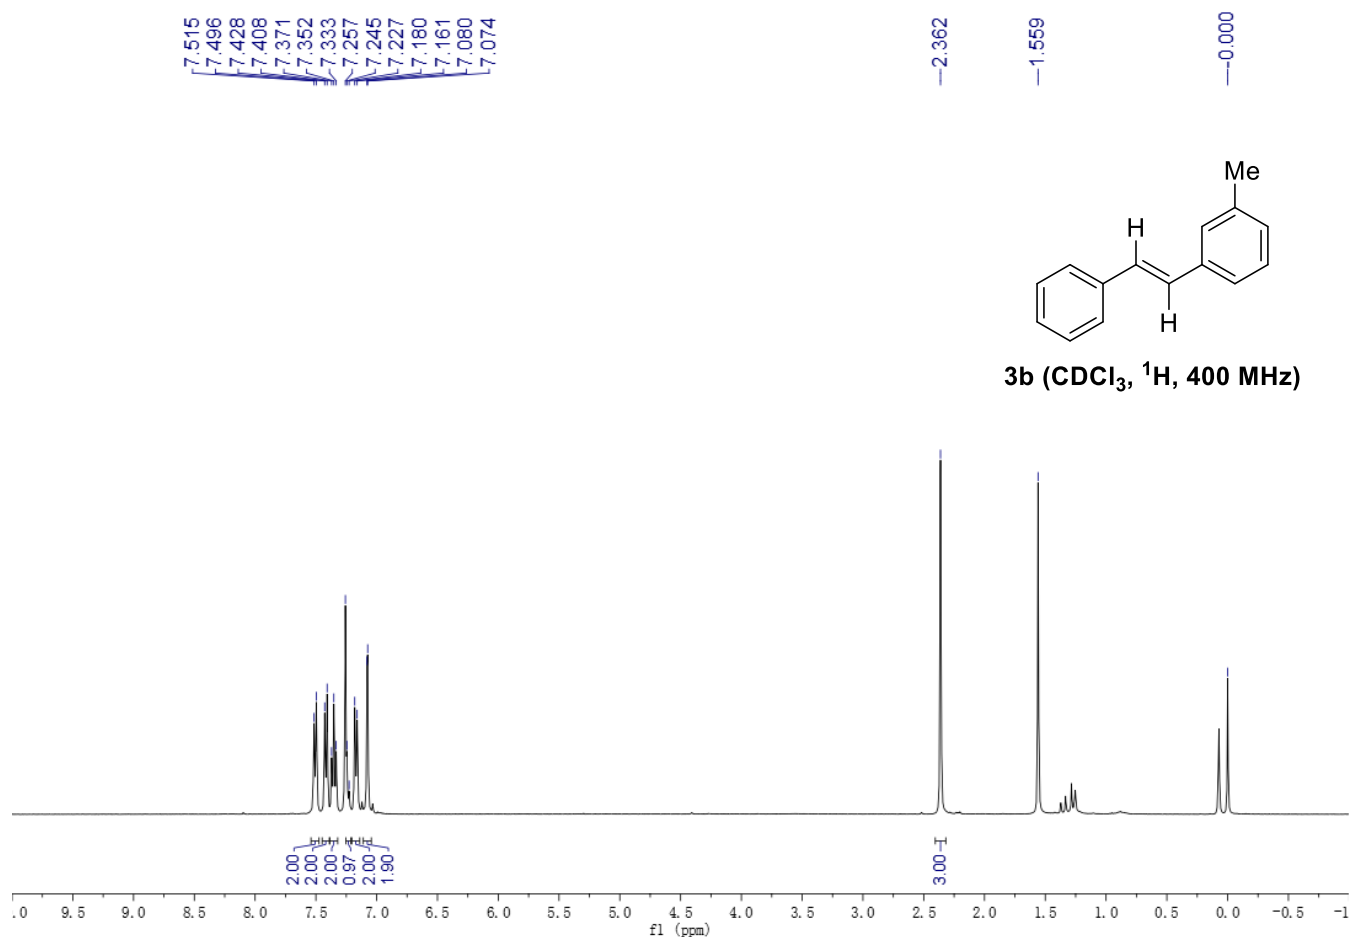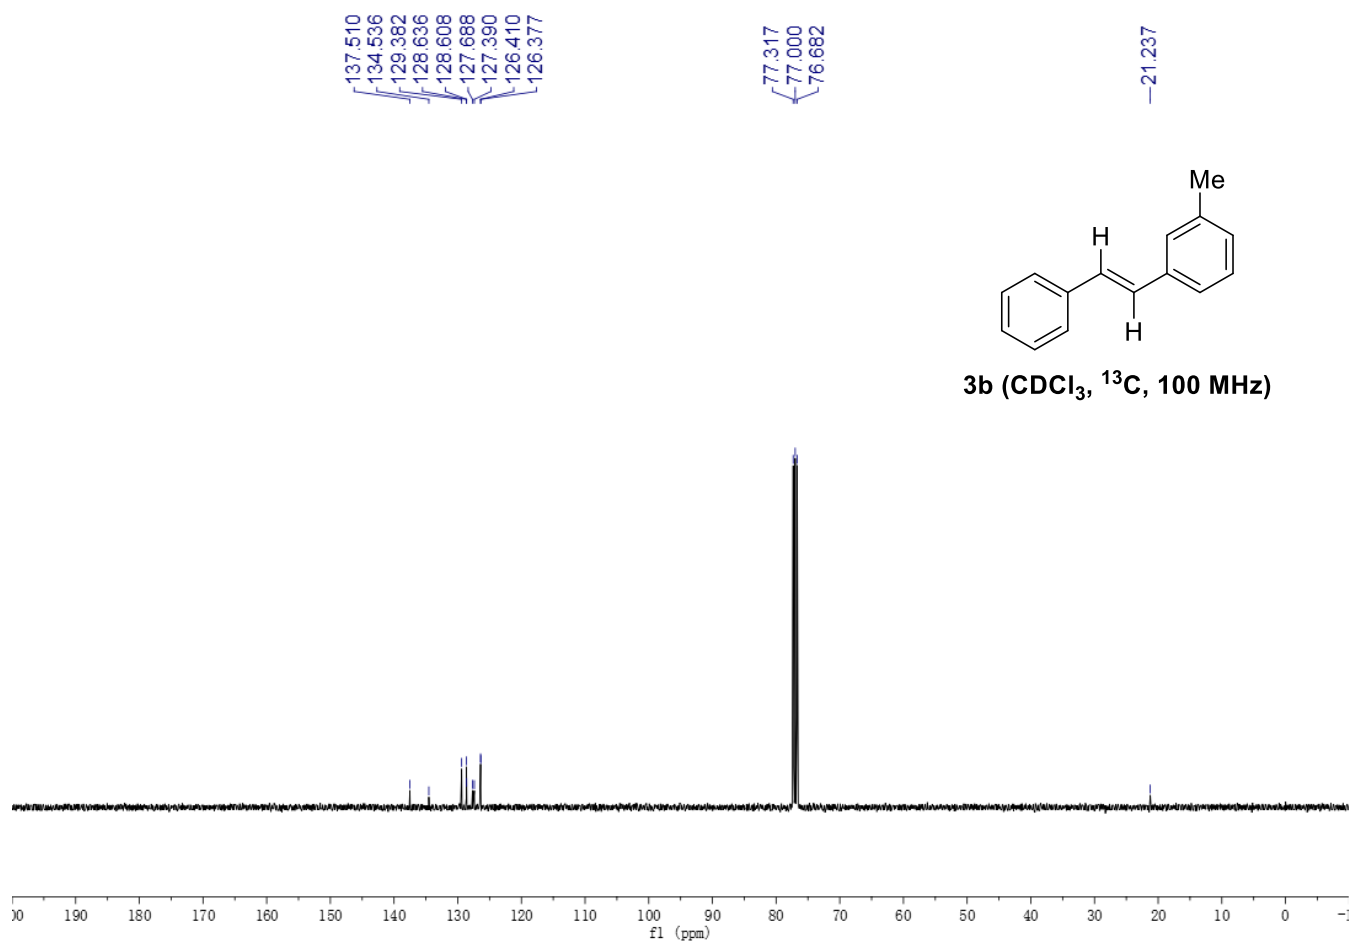

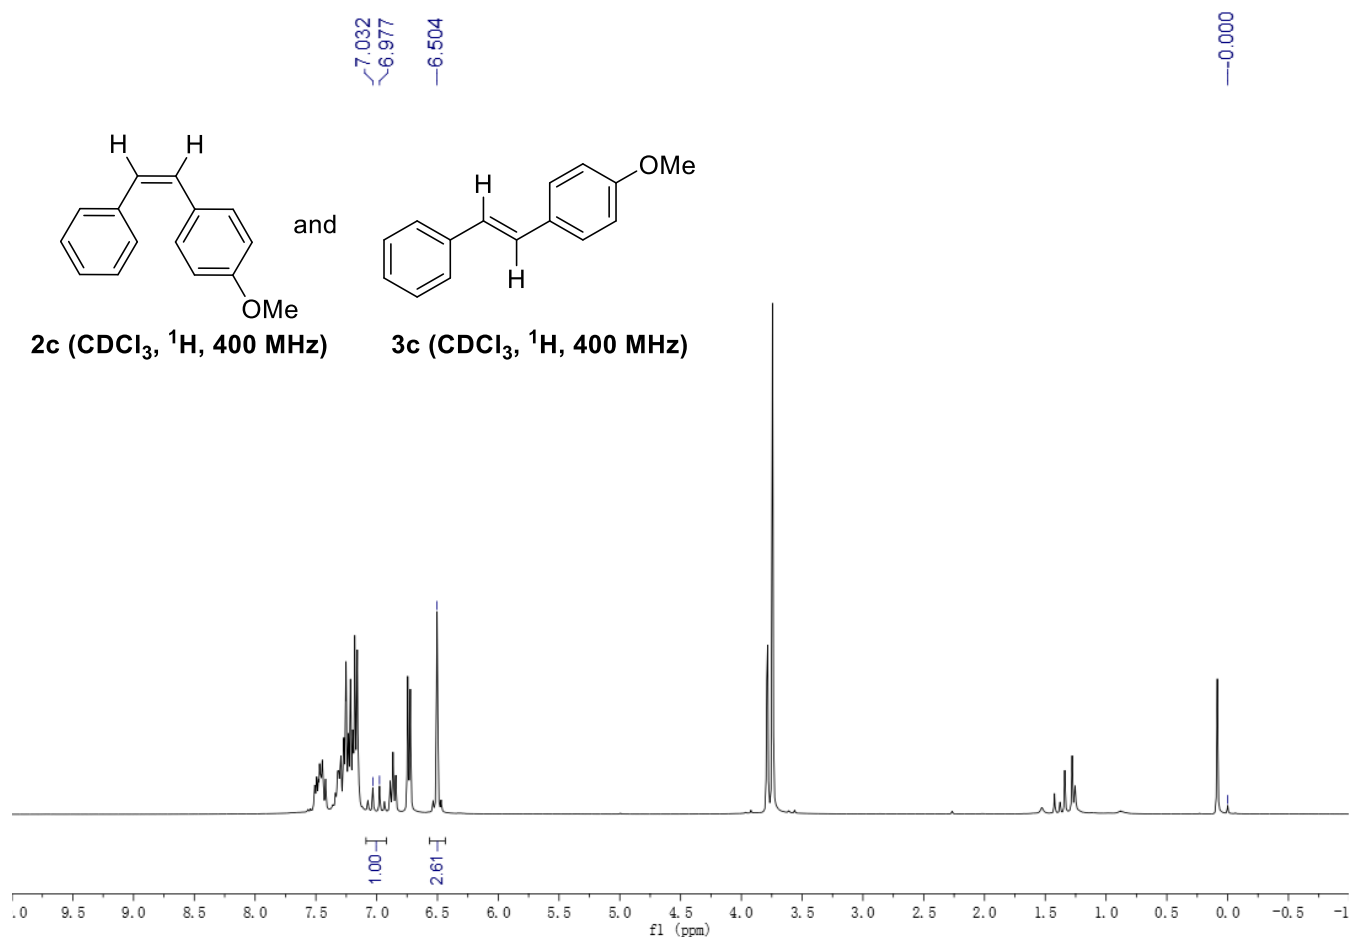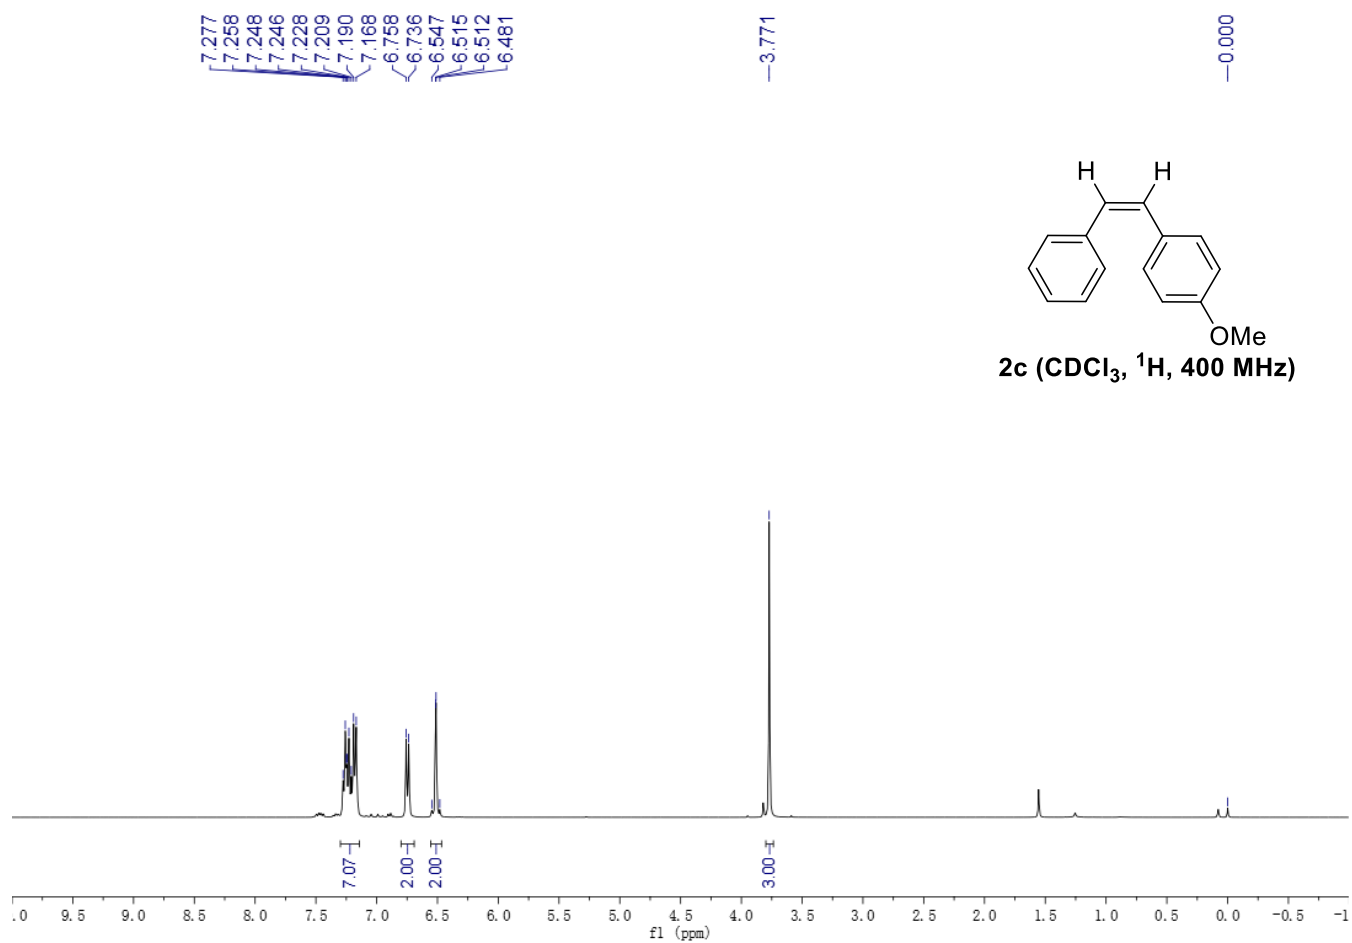

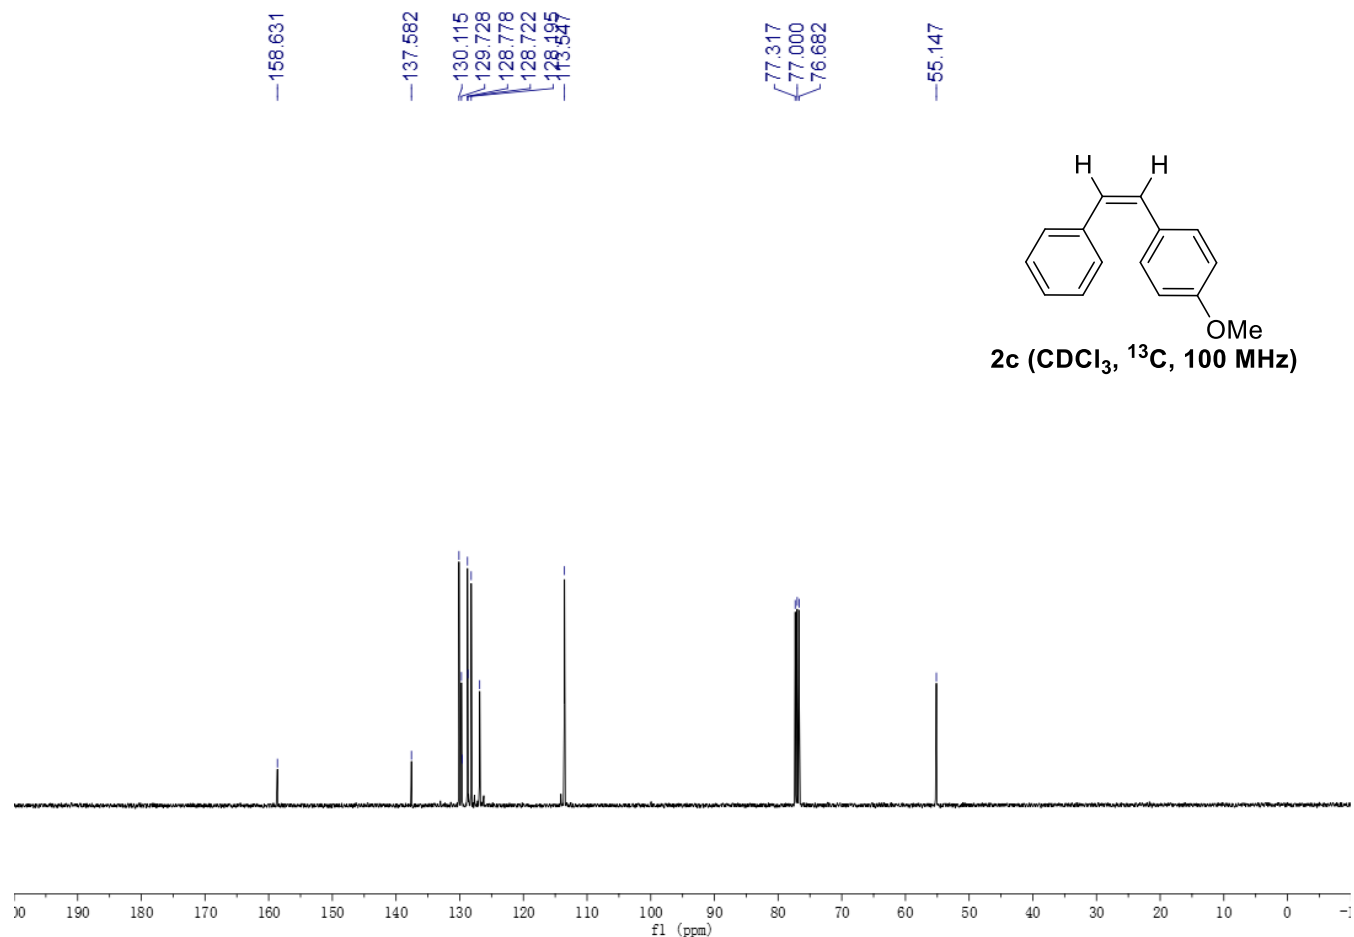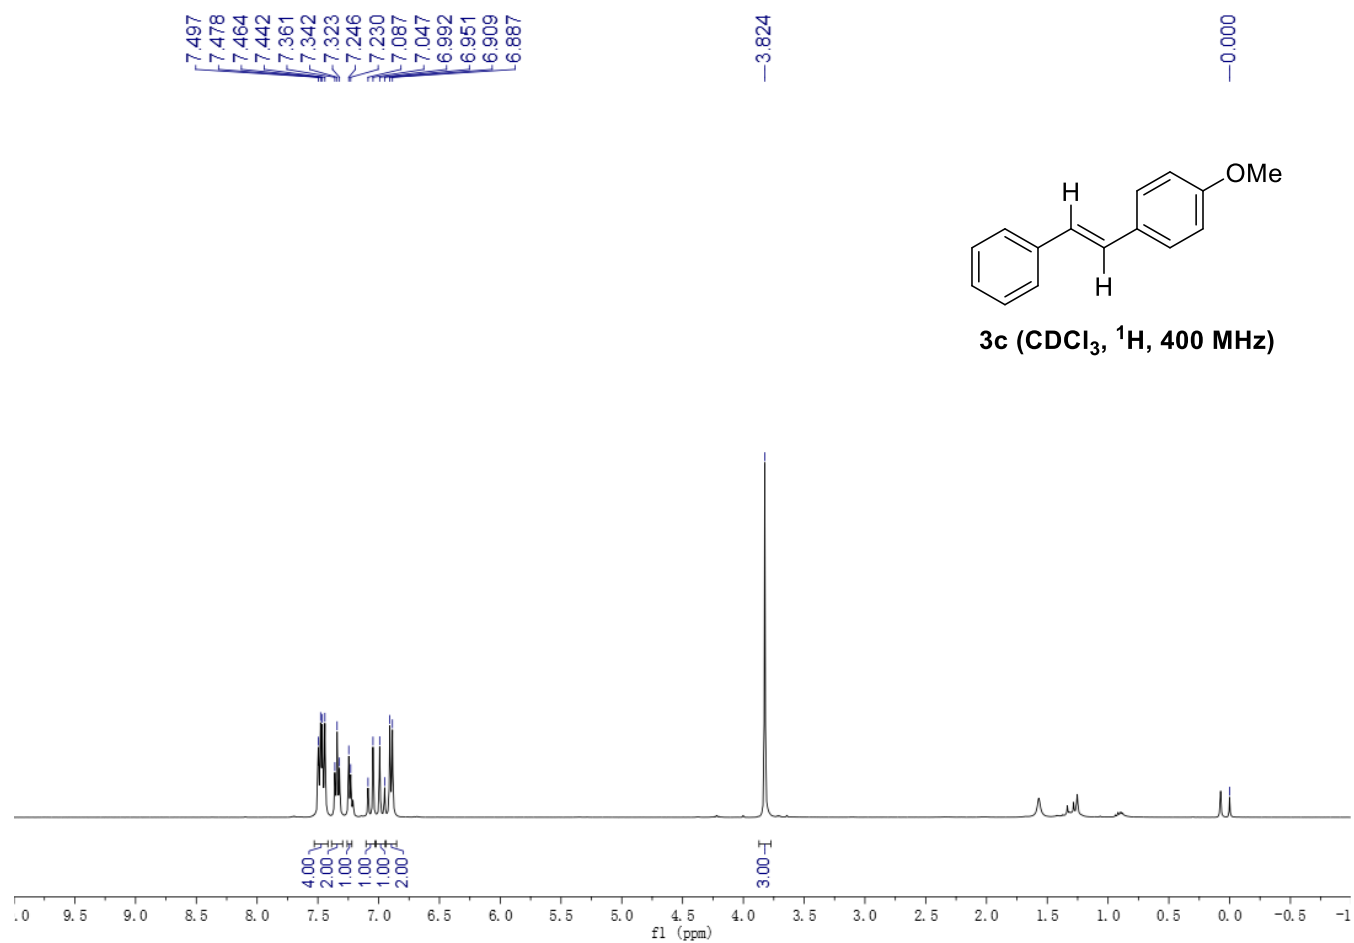

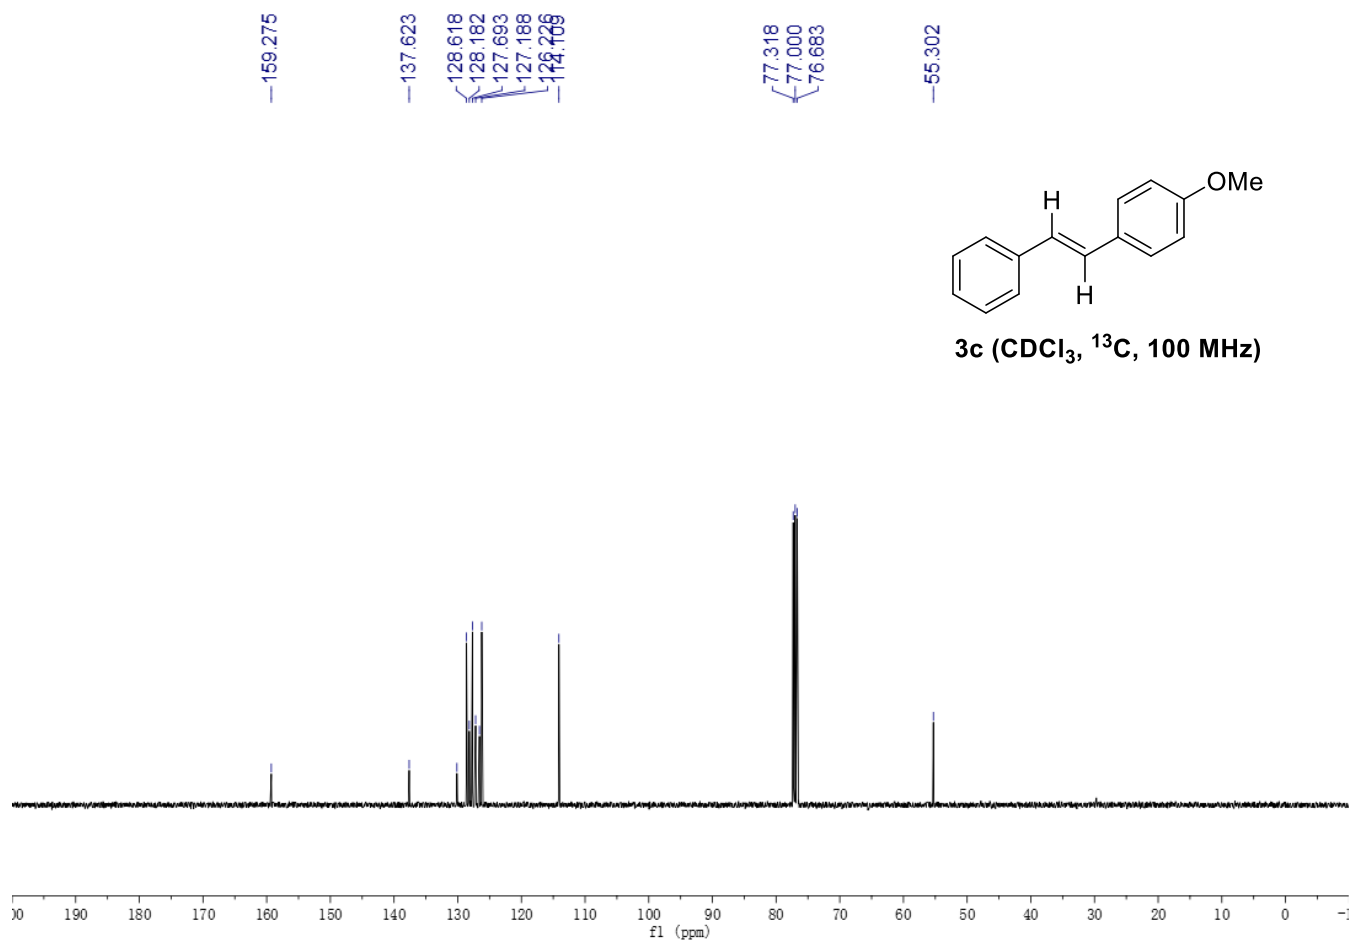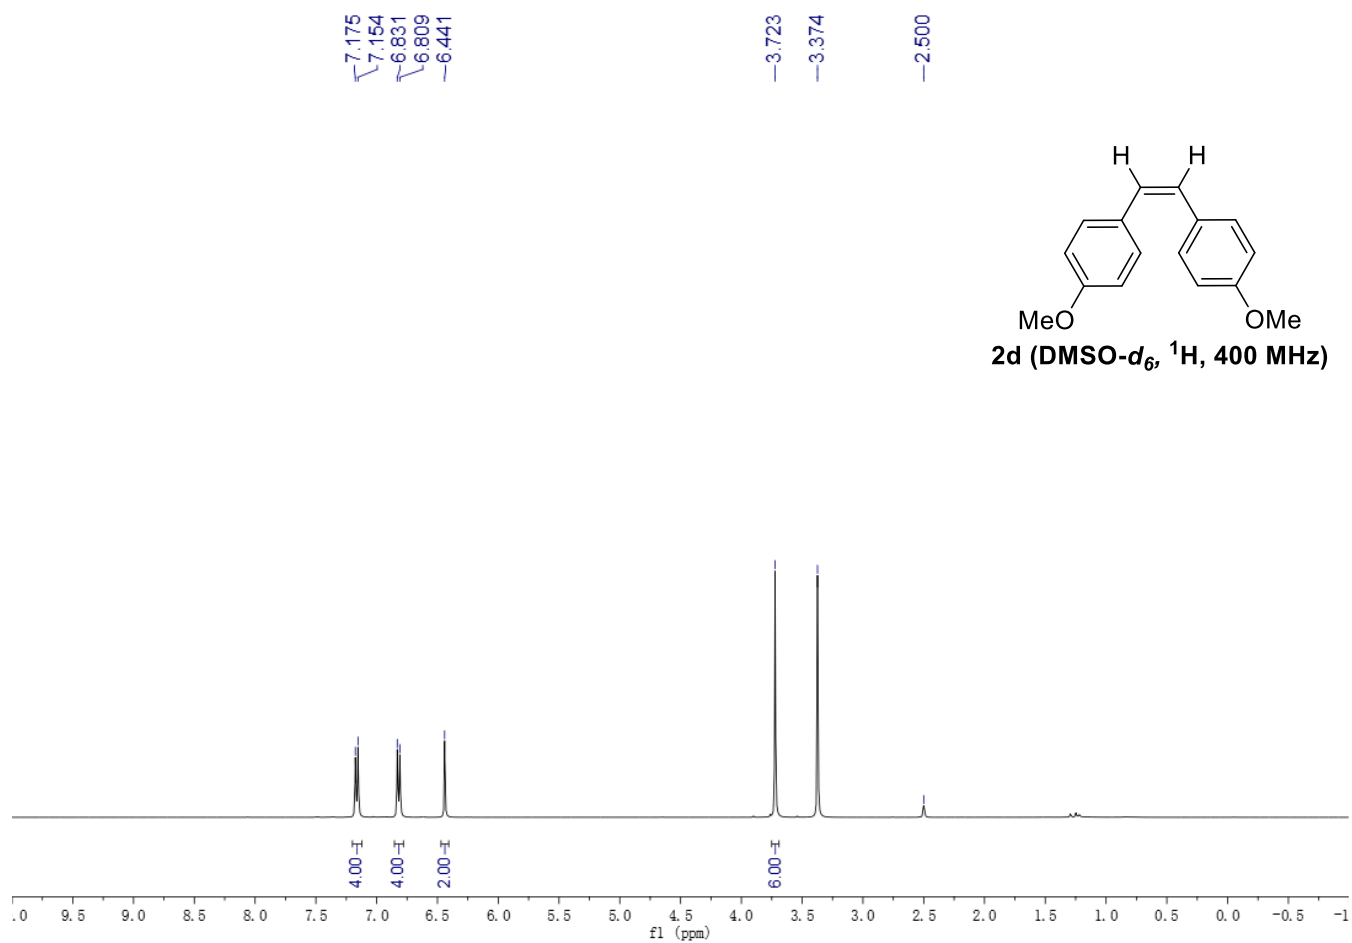



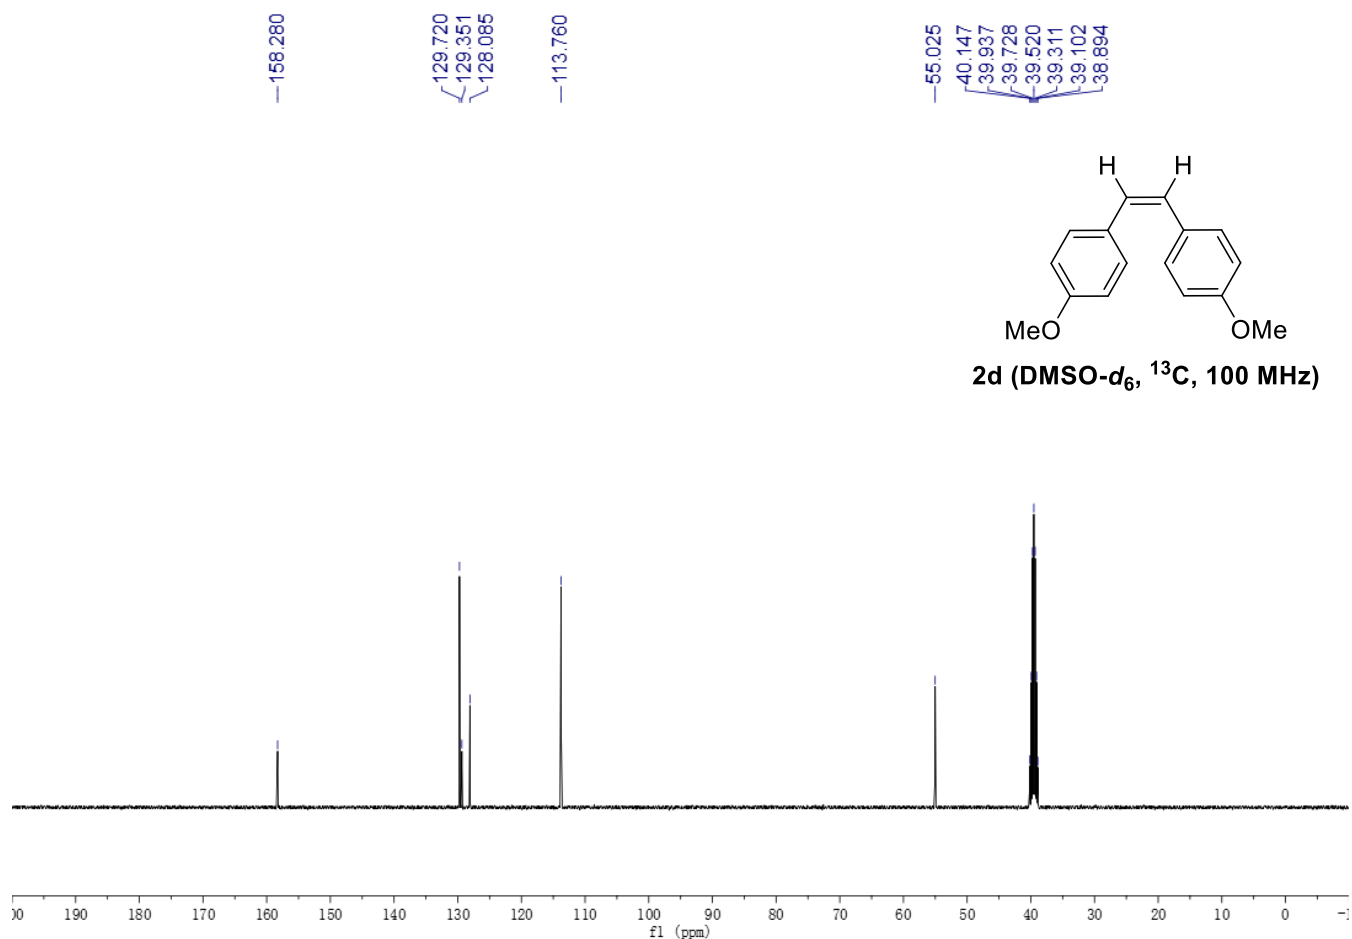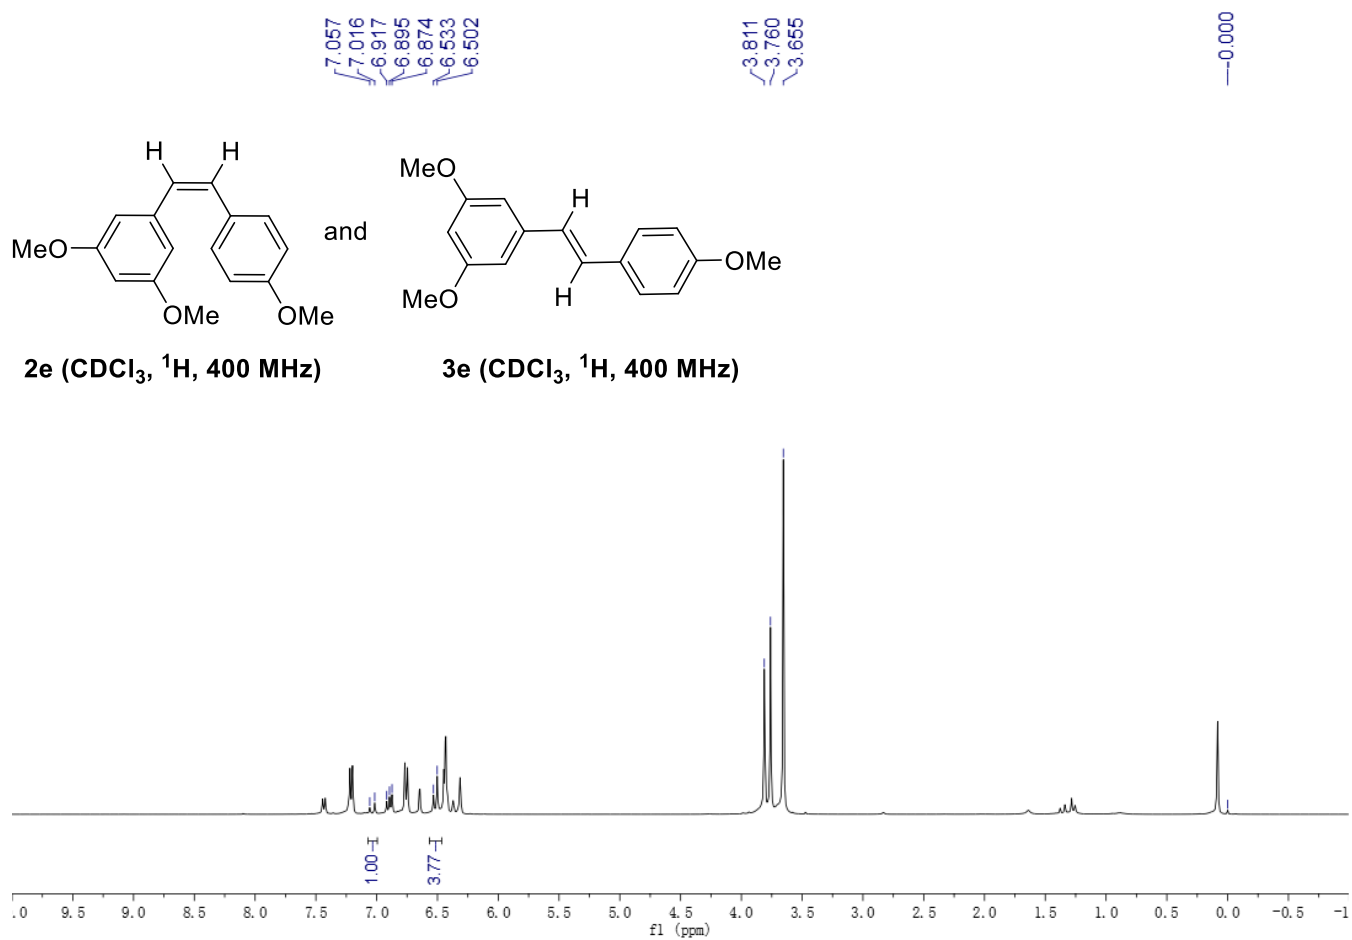

7.224  
7.203  
6.775  
6.754  
6.540  
6.509  
6.454  
6.437  
6.433  
6.317

3.775  
3.665

0.000

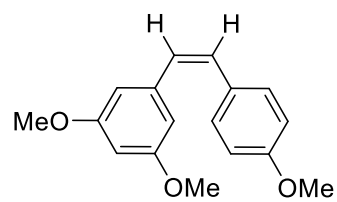

**2e** (CDCl<sub>3</sub>, <sup>1</sup>H, 400 MHz)

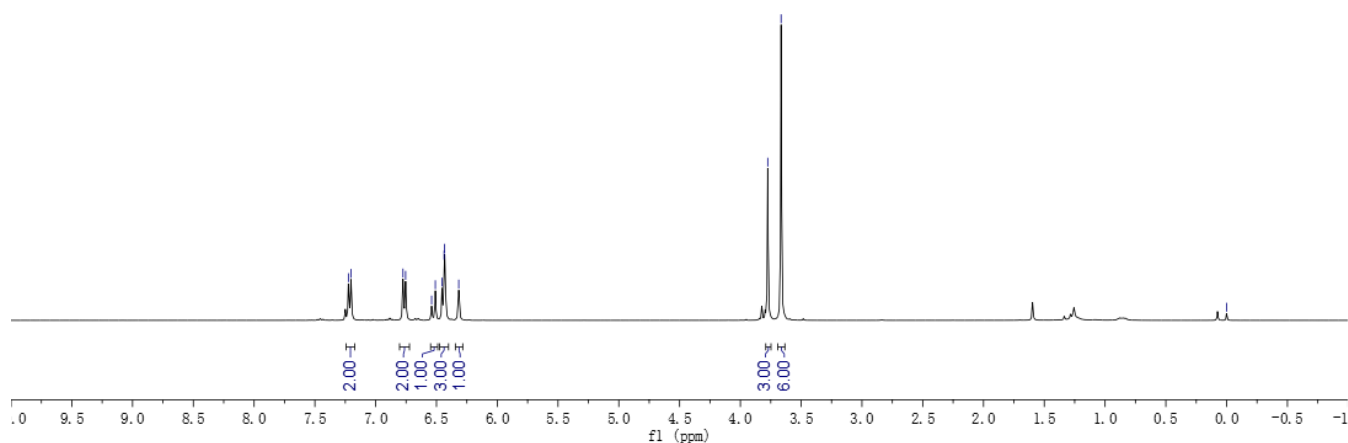

160.527  
158.703

139.448  
130.248  
130.124  
129.520  
128.642

113.491  
106.577  
99.620

77.317  
77.000  
76.682

55.181

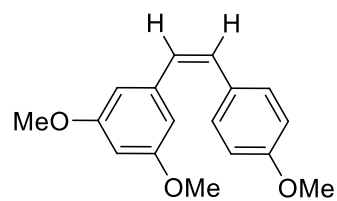

**2e** (CDCl<sub>3</sub>, <sup>13</sup>C, 100 MHz)

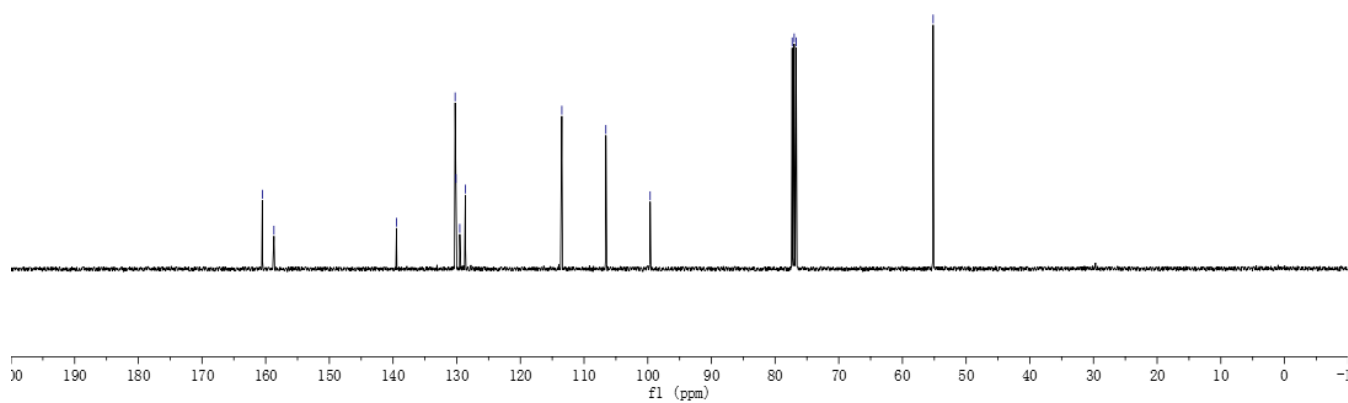

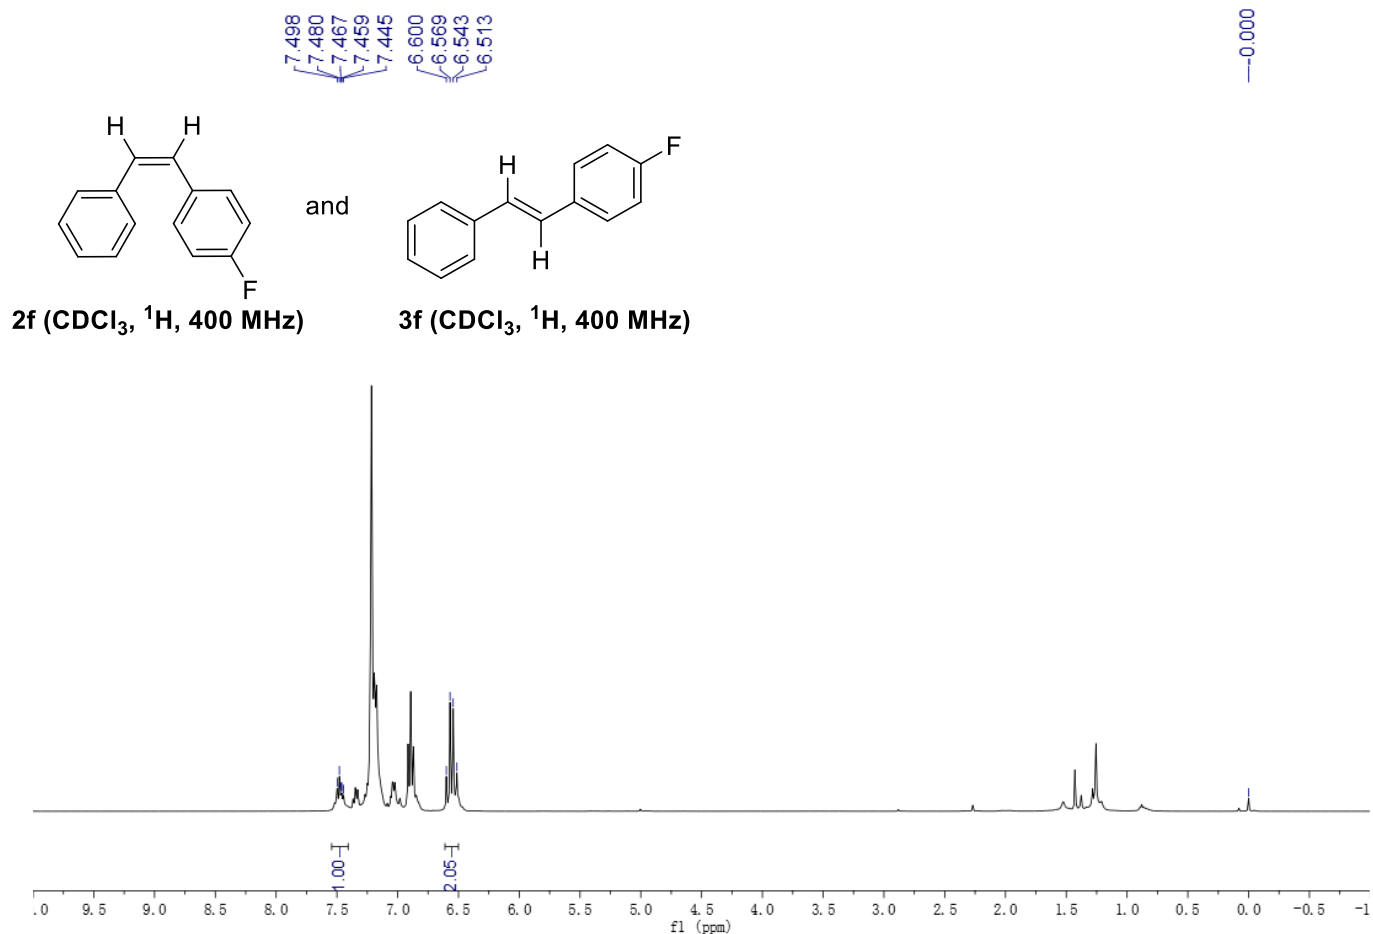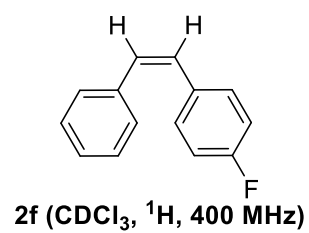

163.031  
160.579  
137.021  
133.186  
133.150  
130.542  
130.464  
130.237  
129.054  
128.799  
128.285  
127.170  
115.230  
115.017

77.317  
77.000  
76.682

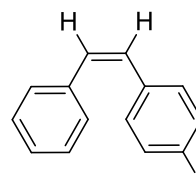

**2f** (CDCl<sub>3</sub>, <sup>13</sup>C, 100 MHz)

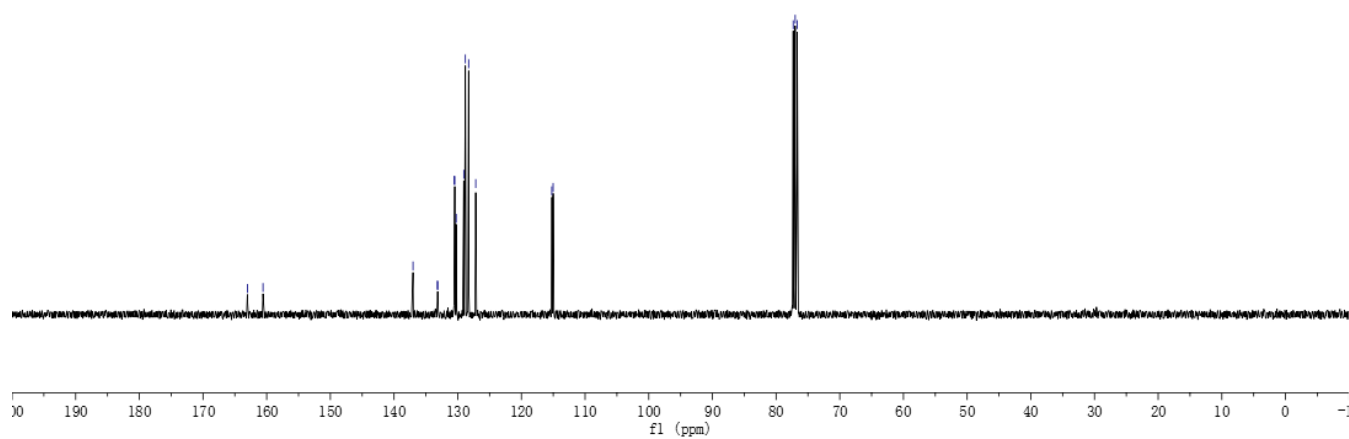

-114.67

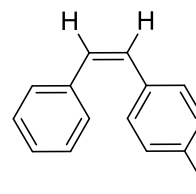

**2f** (CDCl<sub>3</sub>, <sup>19</sup>F, 376 MHz)

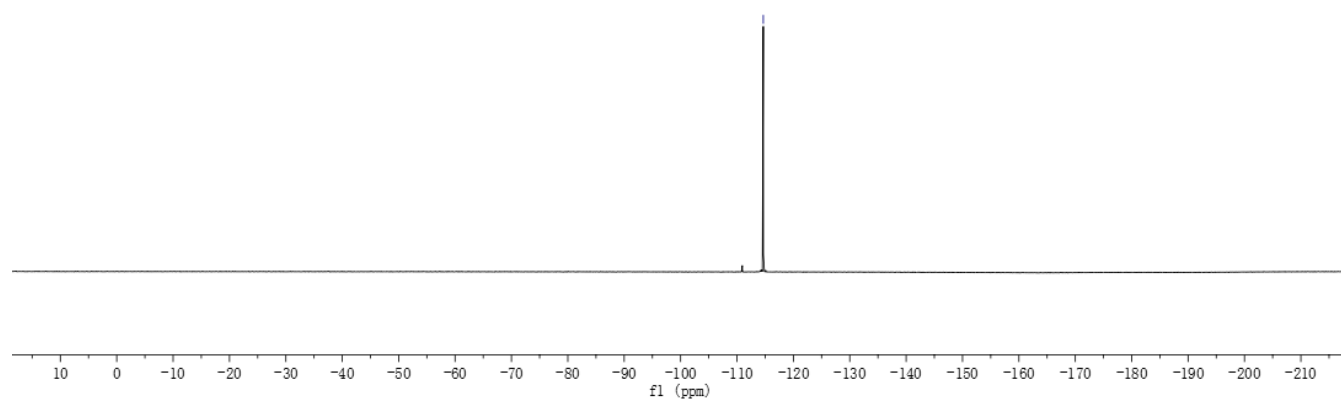

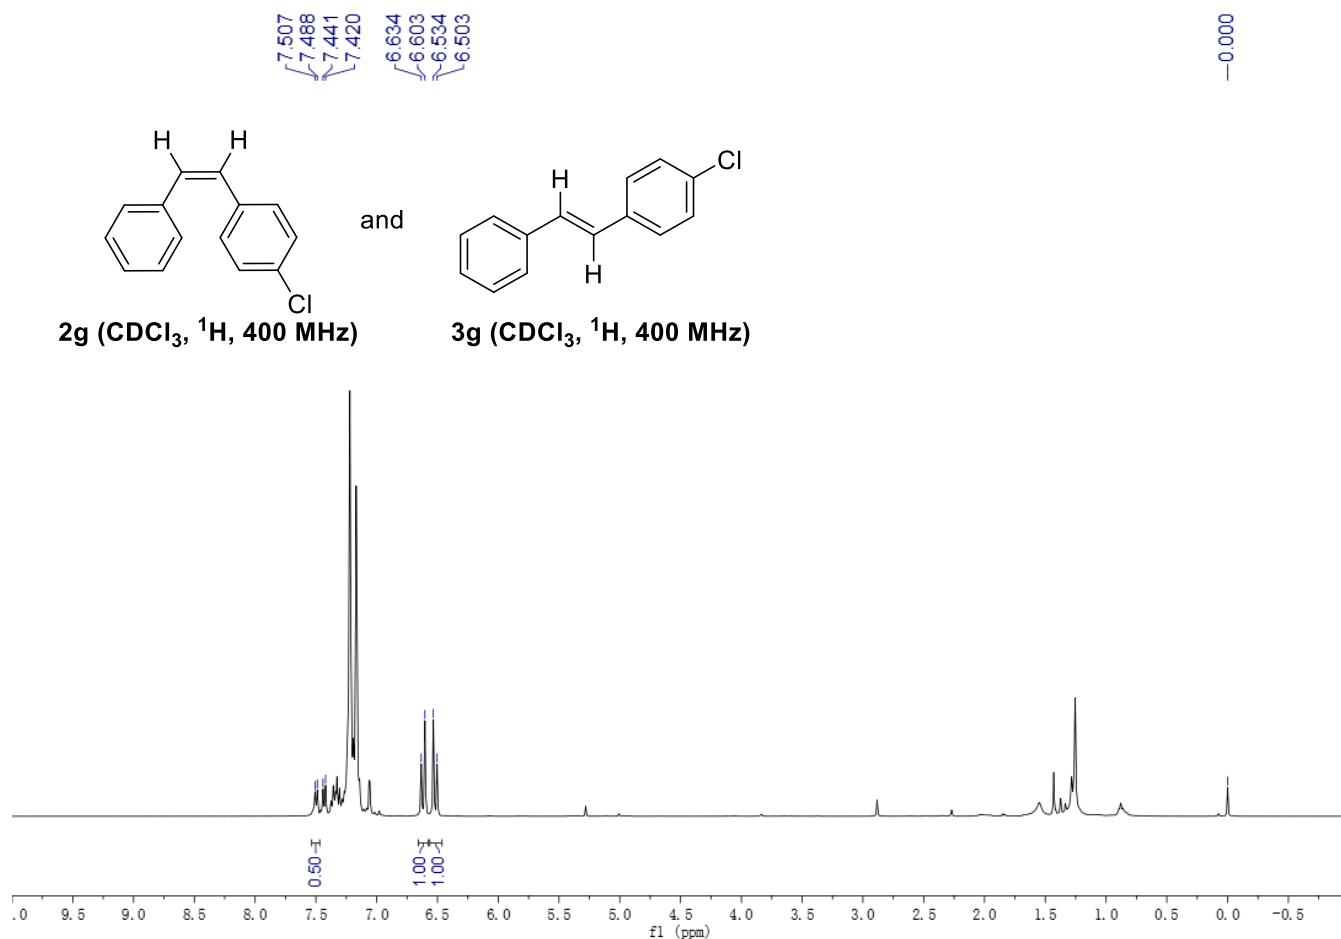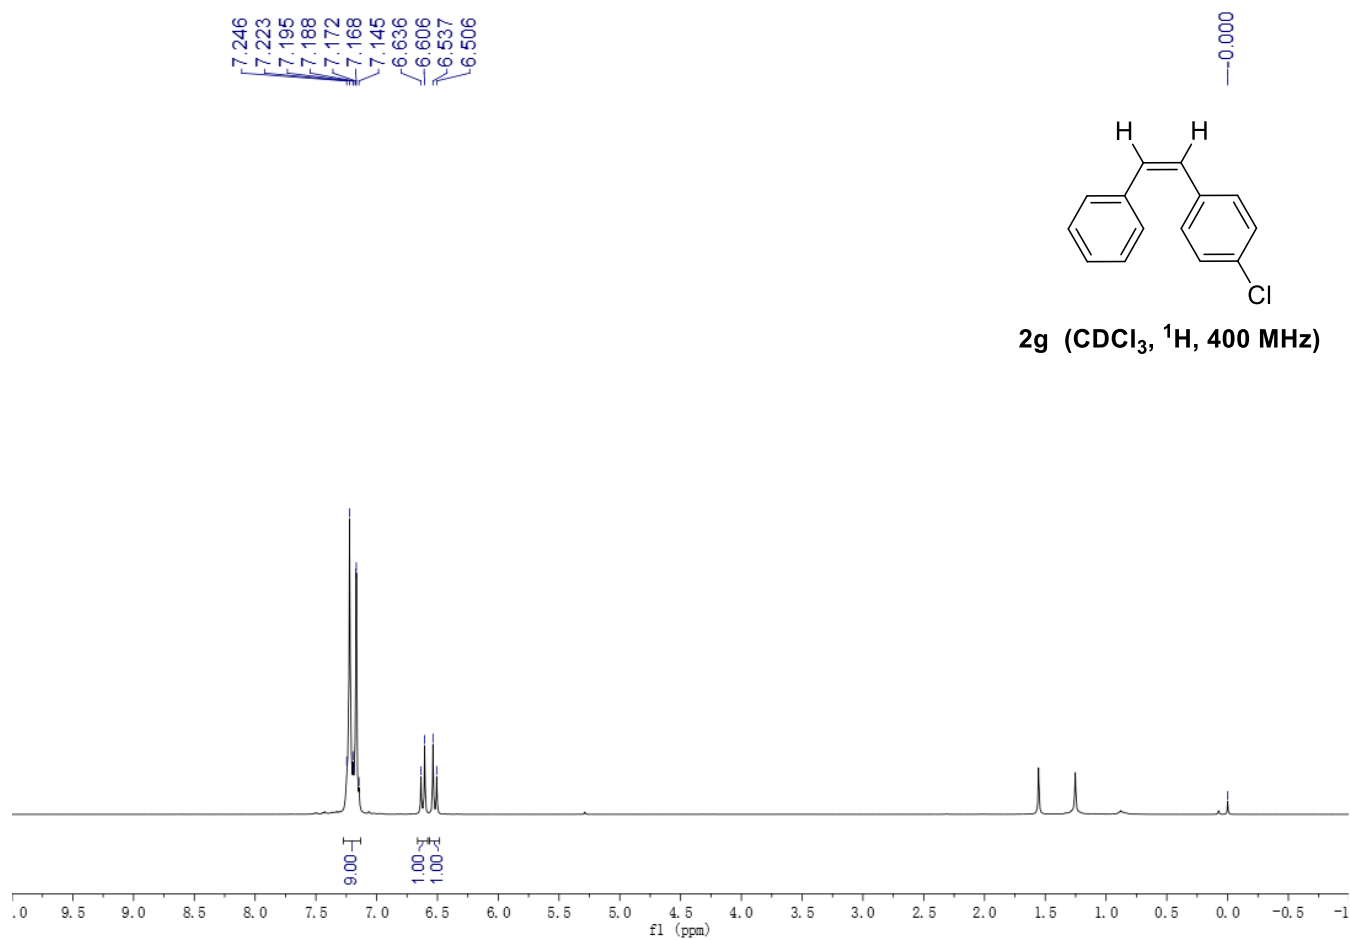

136.838  
135.617  
132.713  
130.924  
130.190  
128.895  
128.780  
128.383  
128.316  
127.296

77.318  
77.000  
76.682

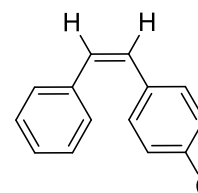

**2g** (CDCl<sub>3</sub>, <sup>13</sup>C, 100 MHz)

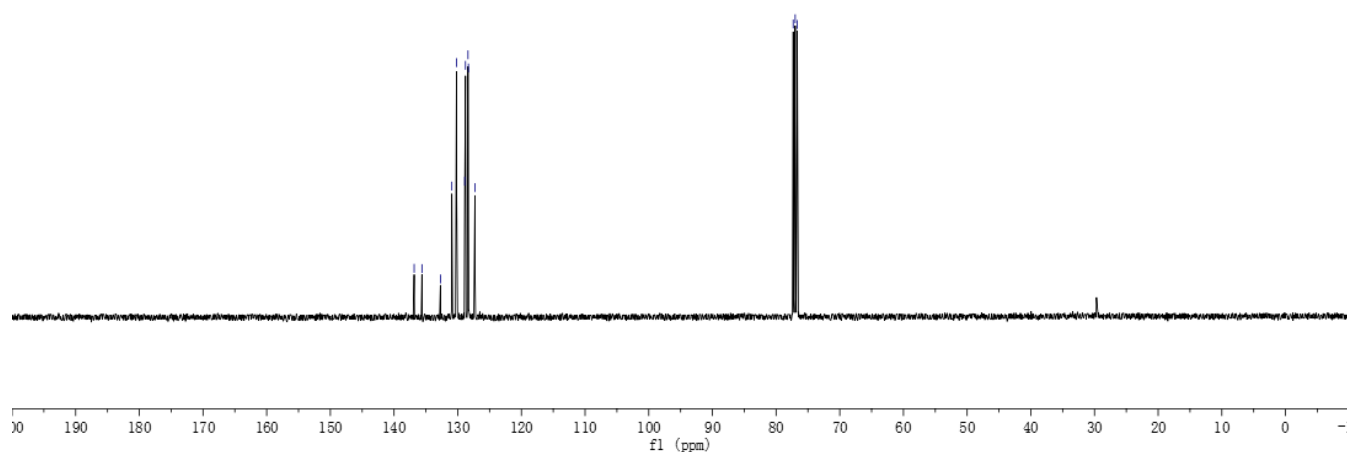

7.502  
7.483  
7.476  
7.455  
7.370  
7.350  
7.336  
7.315  
7.217  
7.104  
7.083  
7.067  
7.037  
6.637  
6.607  
6.506  
6.476

0.000

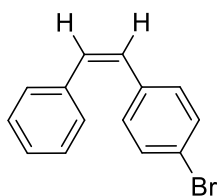

**2h** (CDCl<sub>3</sub>, <sup>1</sup>H, 400 MHz)

and

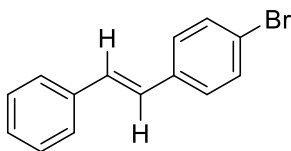

**3h** (CDCl<sub>3</sub>, <sup>1</sup>H, 400 MHz)

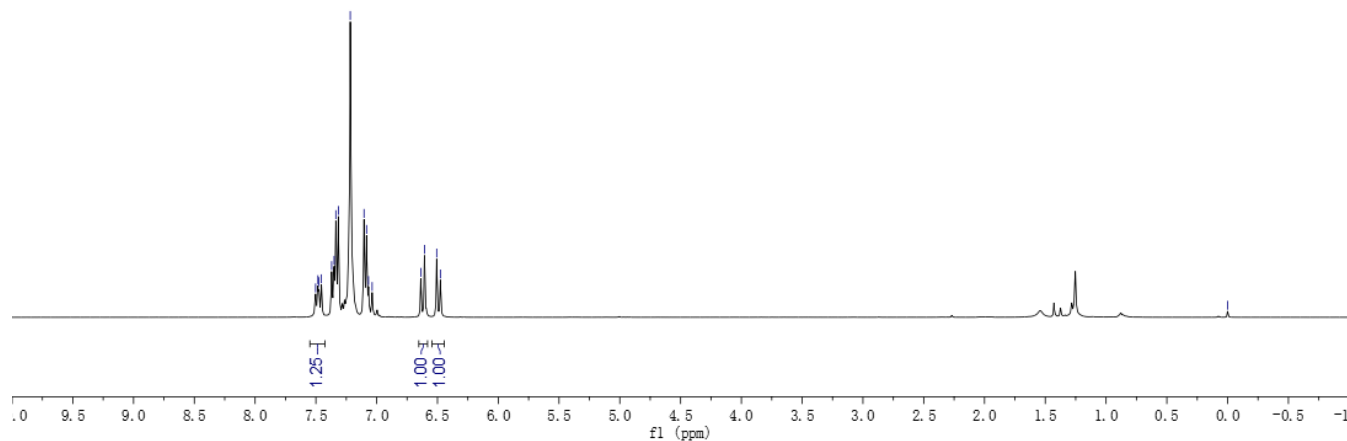

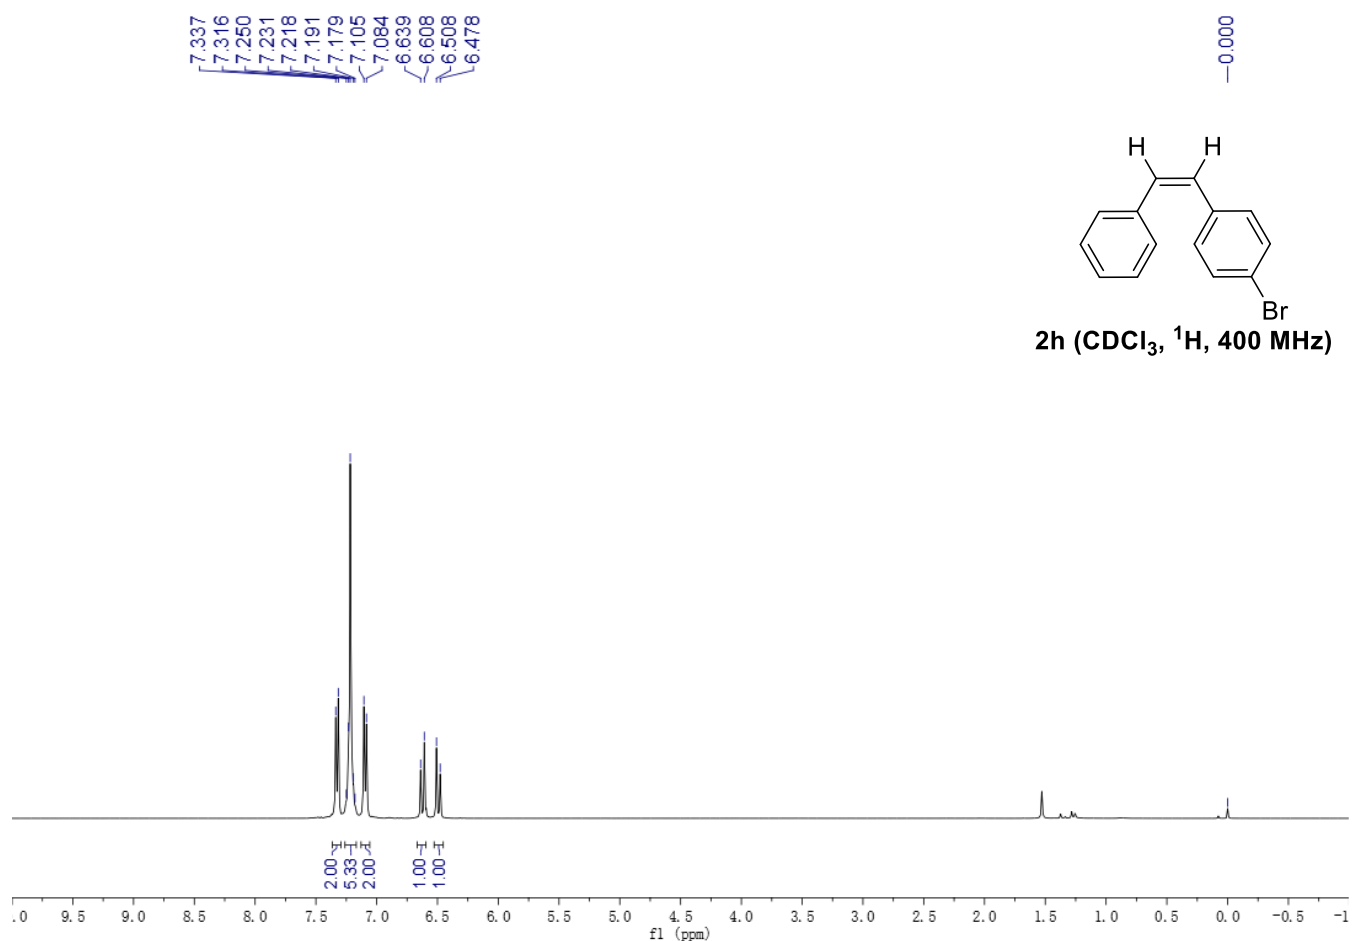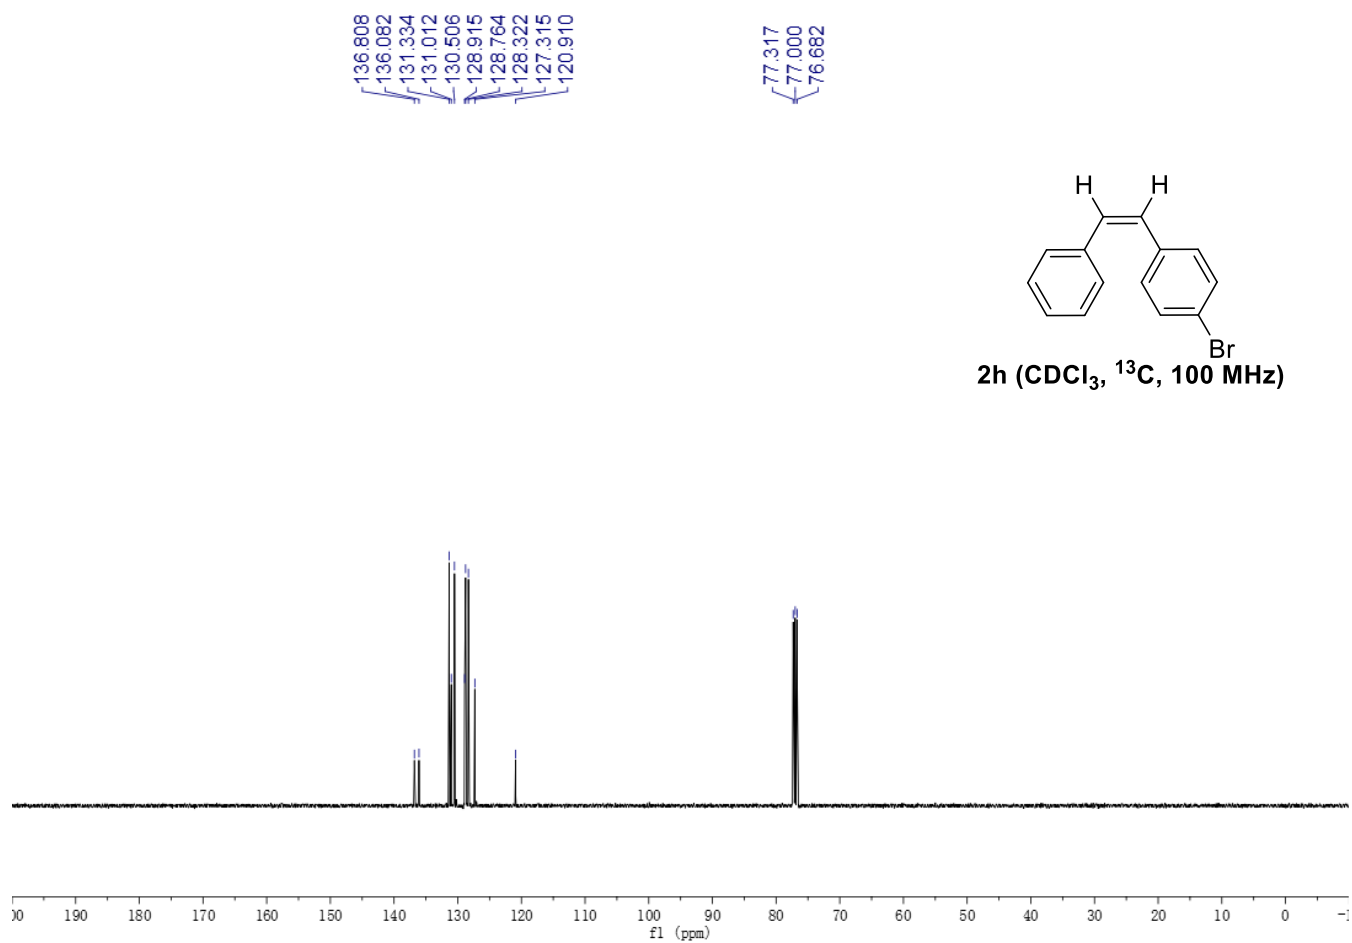

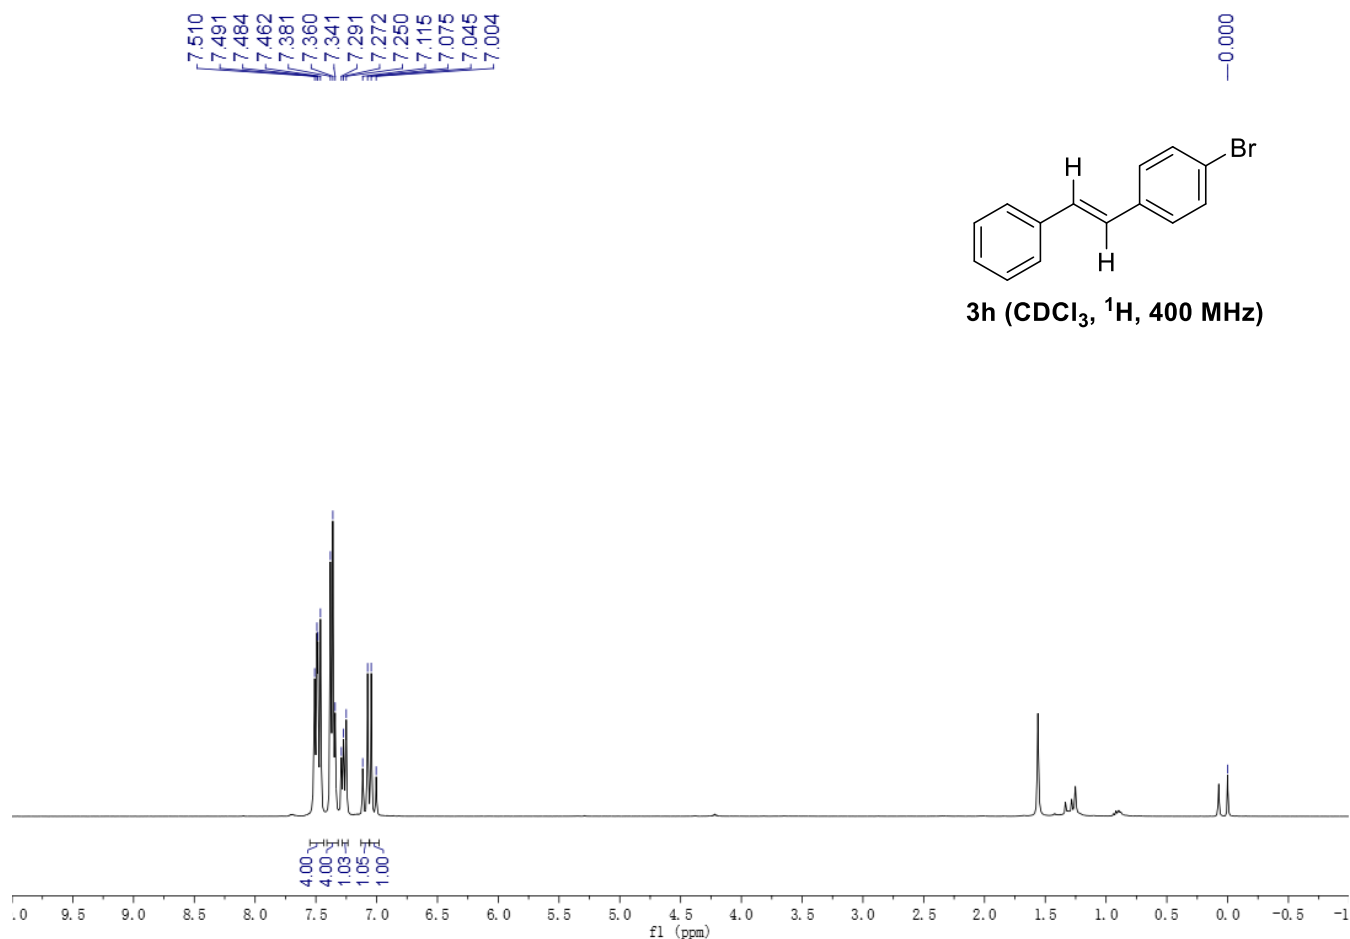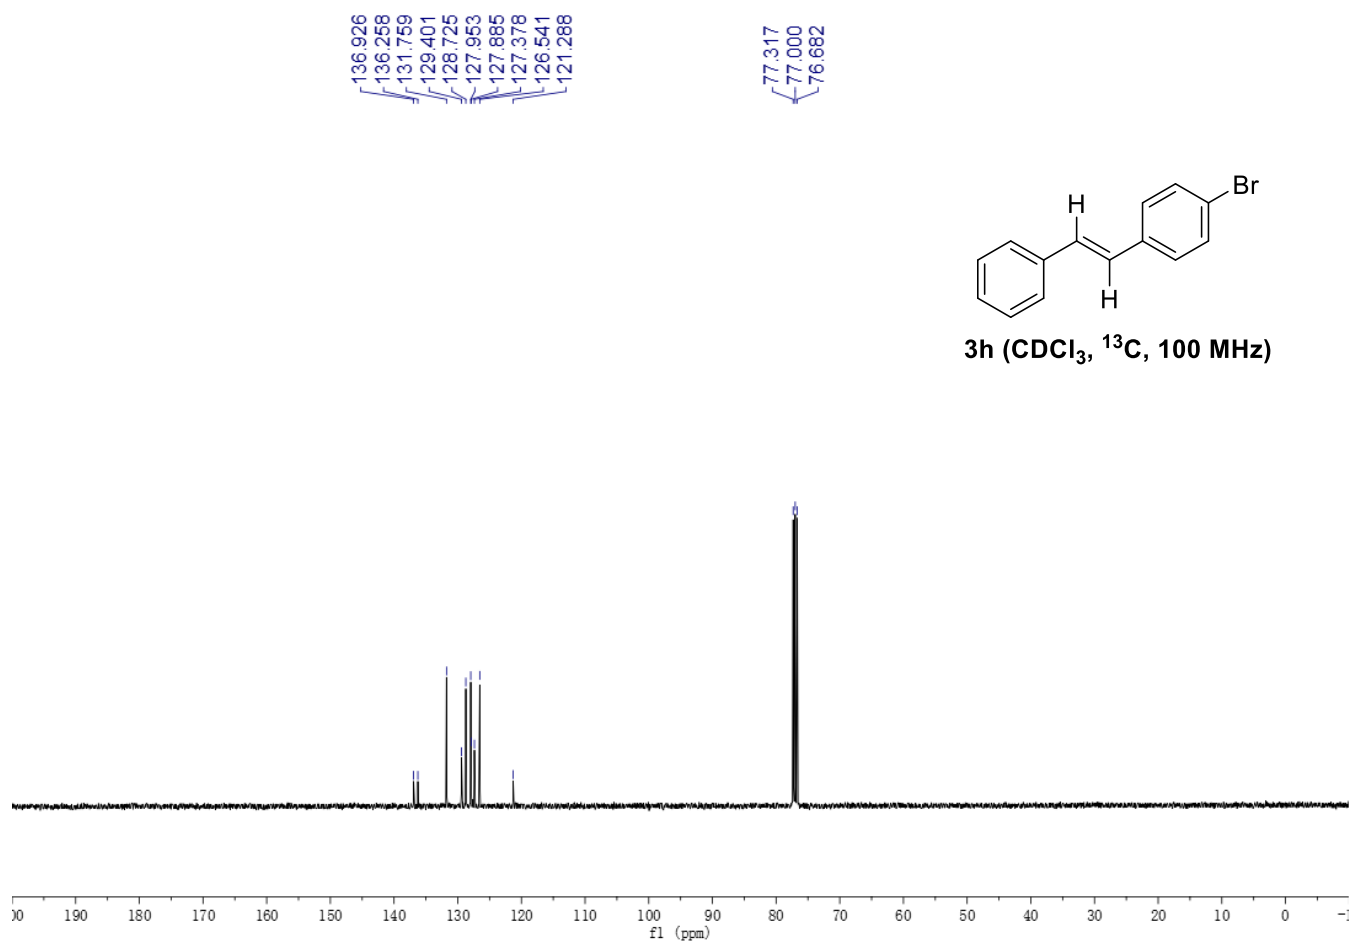



7.270  
7.249  
6.999  
6.978

6.438

5.864

1.969

0.000

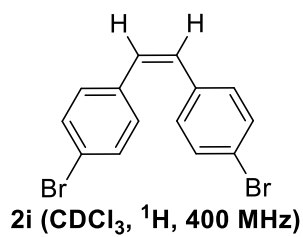

and

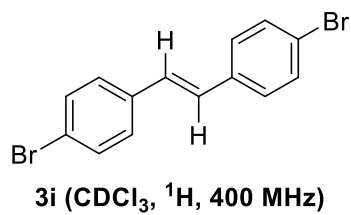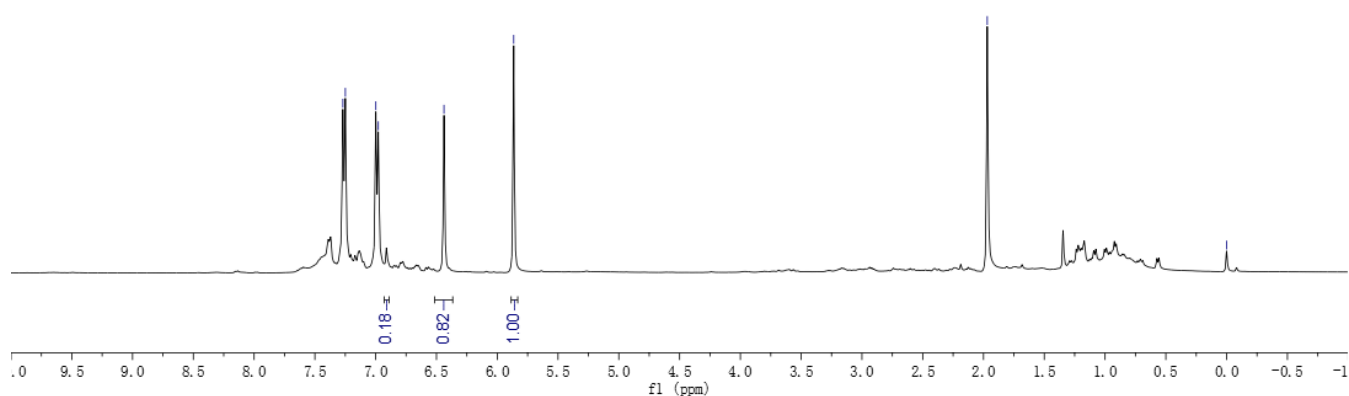

7.360  
7.340  
7.087  
7.066

6.530

0.000

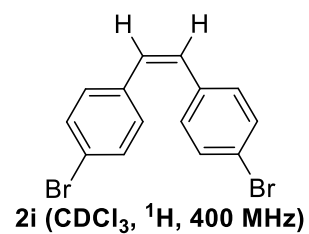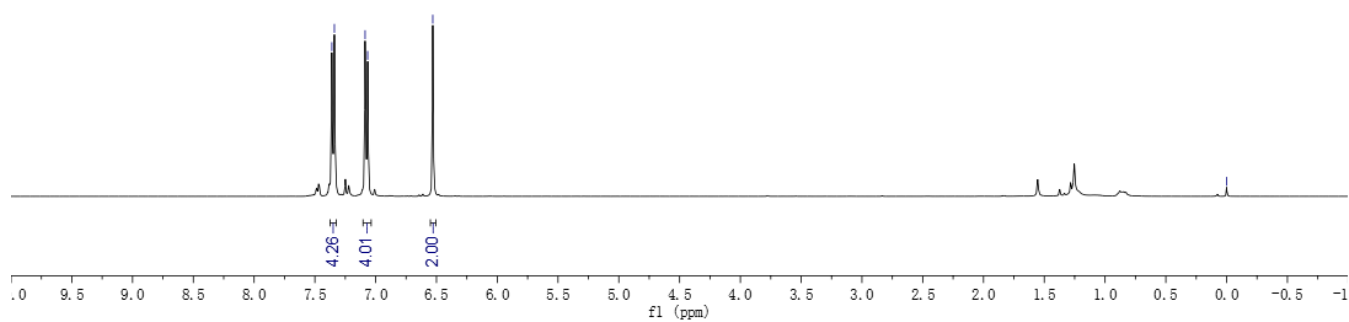

135.646  
131.490  
130.420  
129.682  
121.207

77.318  
77.000  
76.683

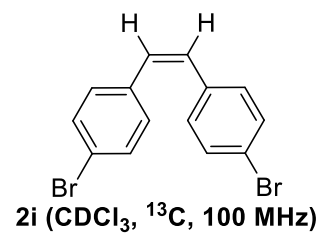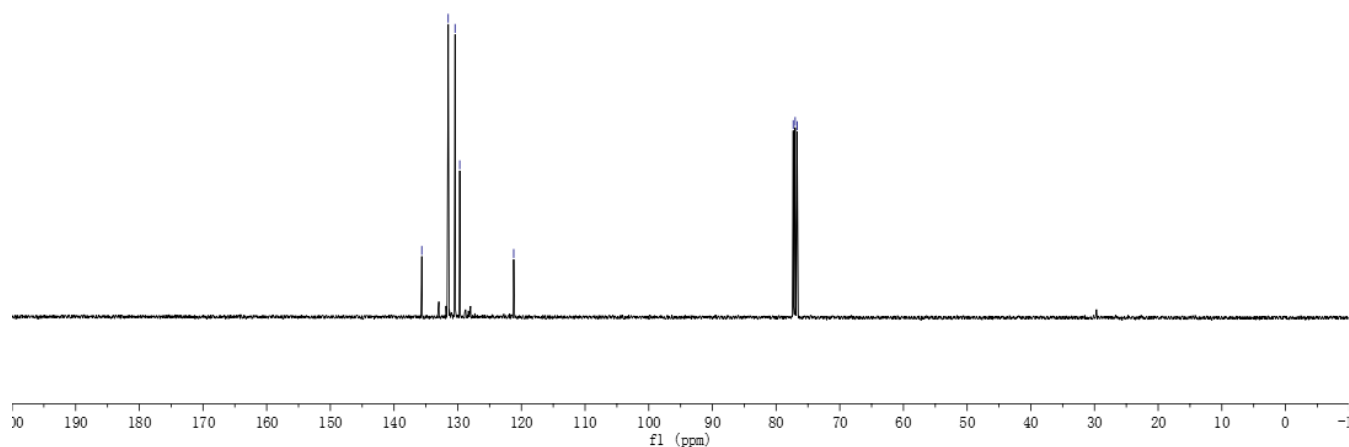

7.590  
7.534  
7.515  
7.465  
7.445  
7.369  
7.354  
6.724  
6.693  
6.594  
6.563

0.000

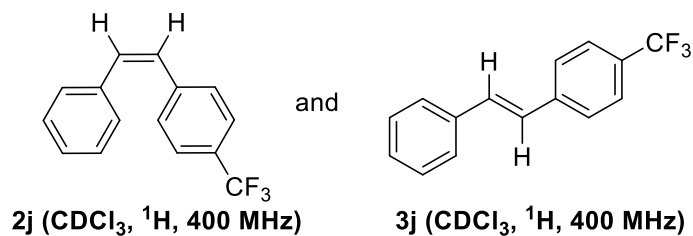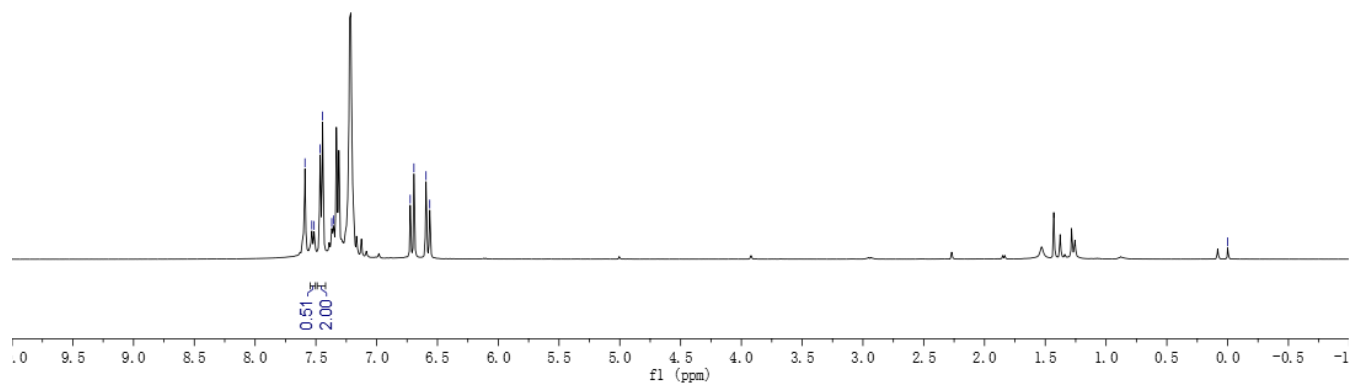

7.472  
7.452  
7.340  
7.319  
7.262  
7.248  
7.230  
7.218  
6.732  
6.702  
6.604  
6.574

0.000

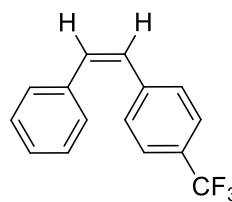

2j (CDCl<sub>3</sub>, <sup>1</sup>H, 400 MHz)

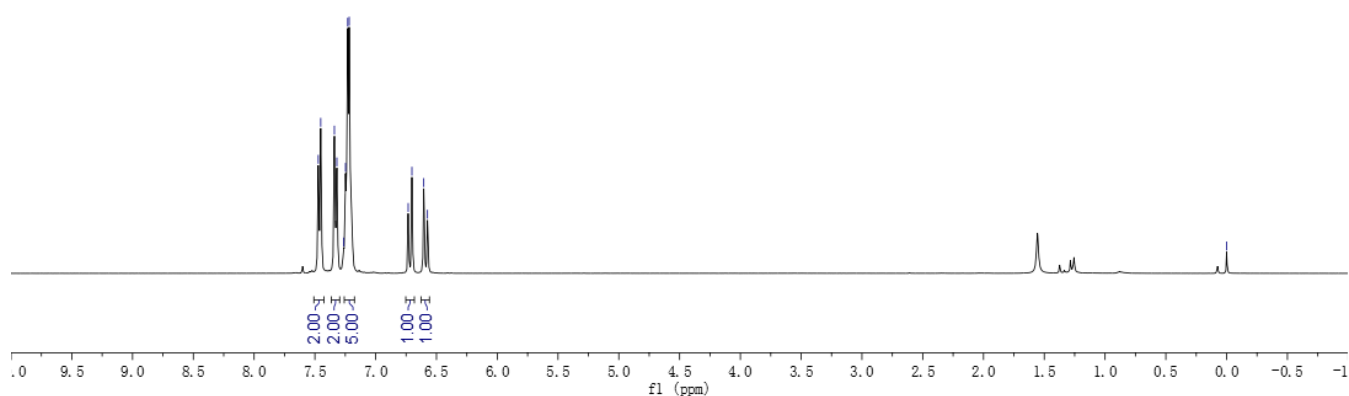

140.901  
140.889  
136.535  
132.313  
129.117  
128.798  
128.724  
128.402  
127.553  
125.513  
125.186  
125.150  
125.112  
125.074  
122.809

77.318  
77.000  
76.683

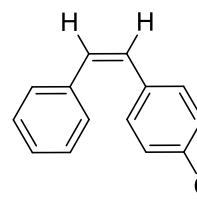

2j (CDCl<sub>3</sub>, <sup>13</sup>C, 100 MHz)

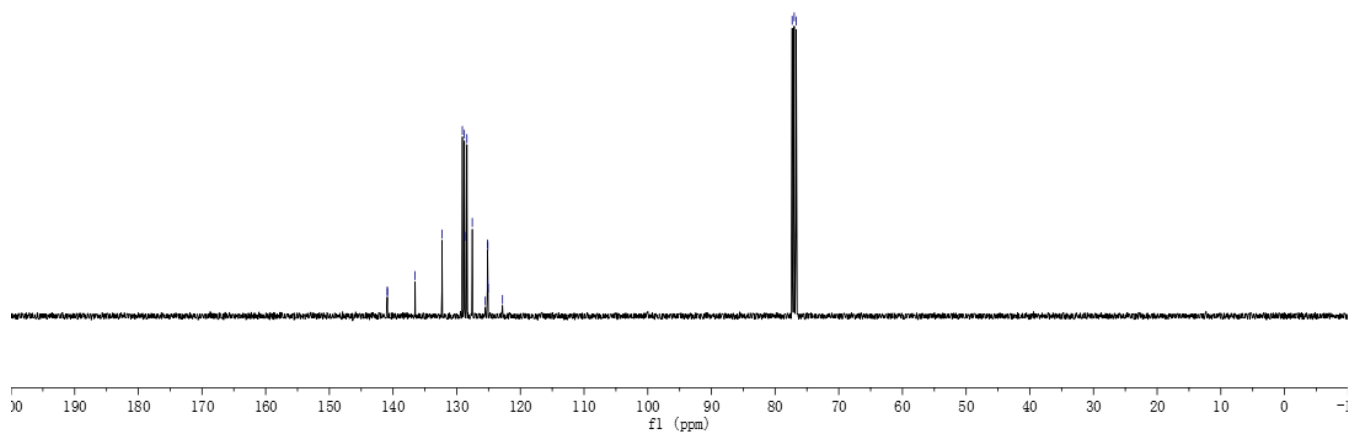

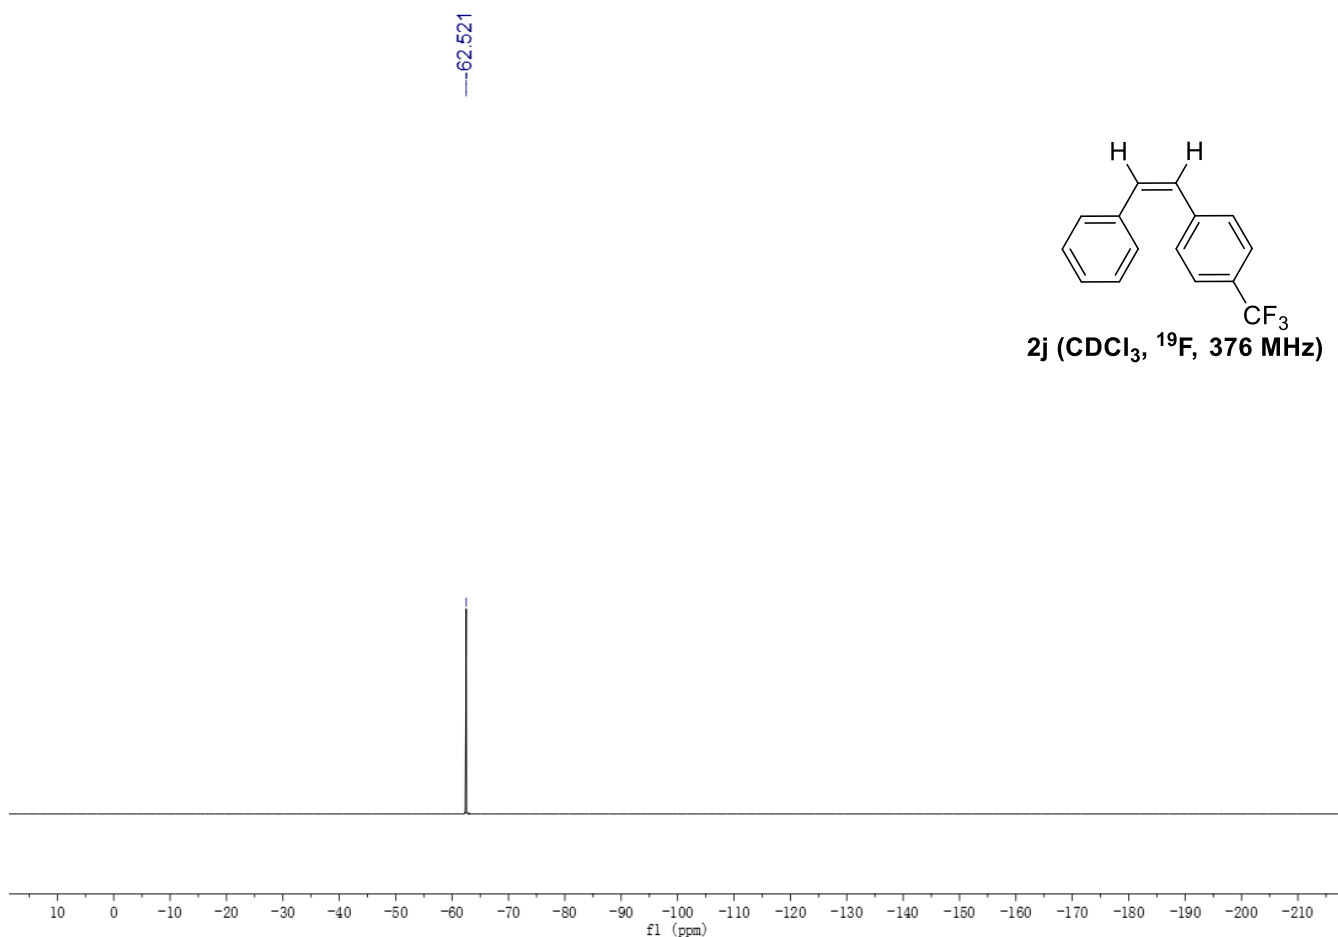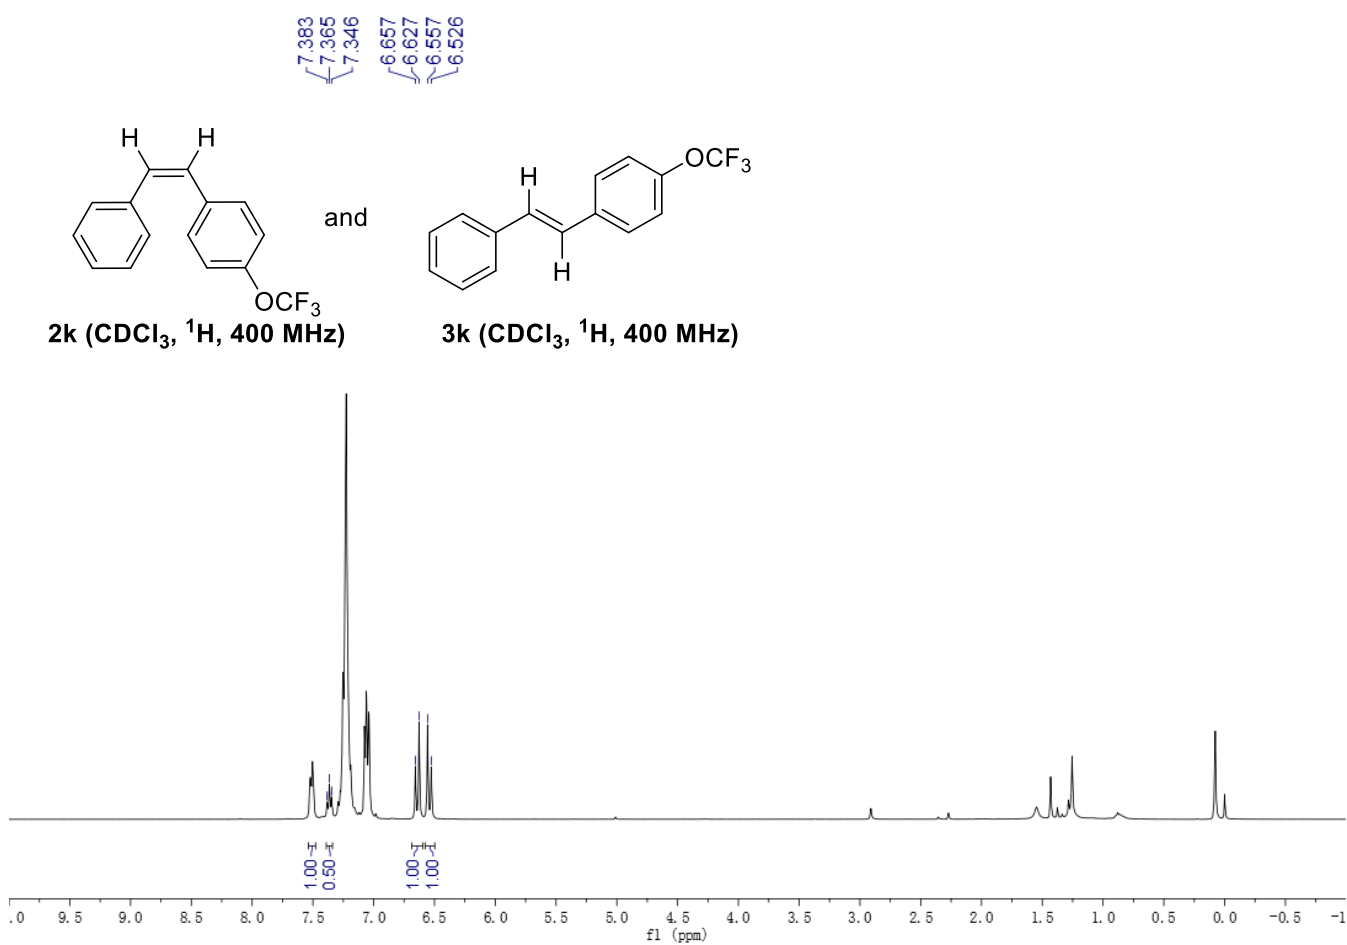

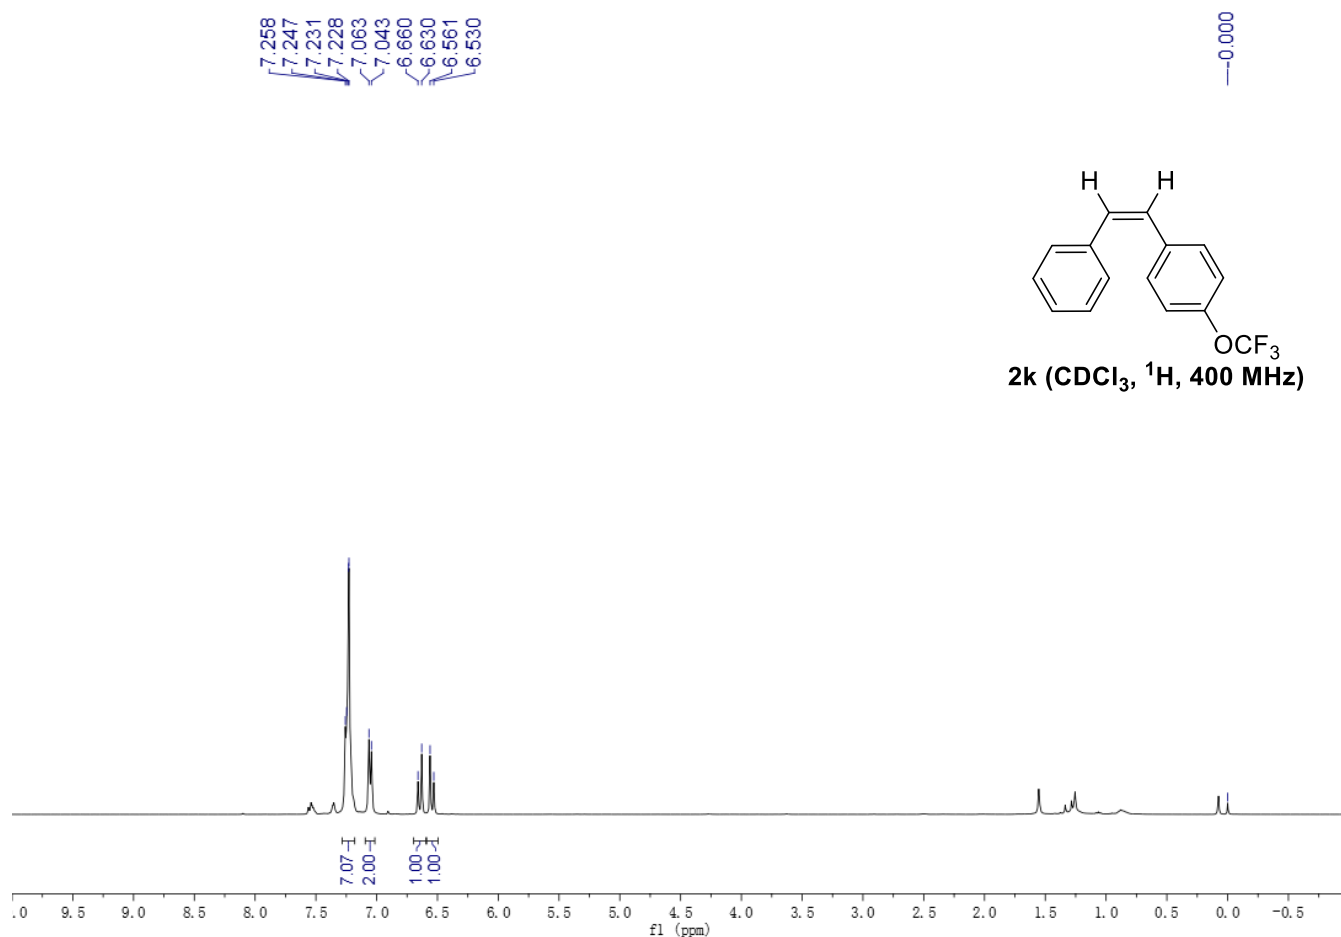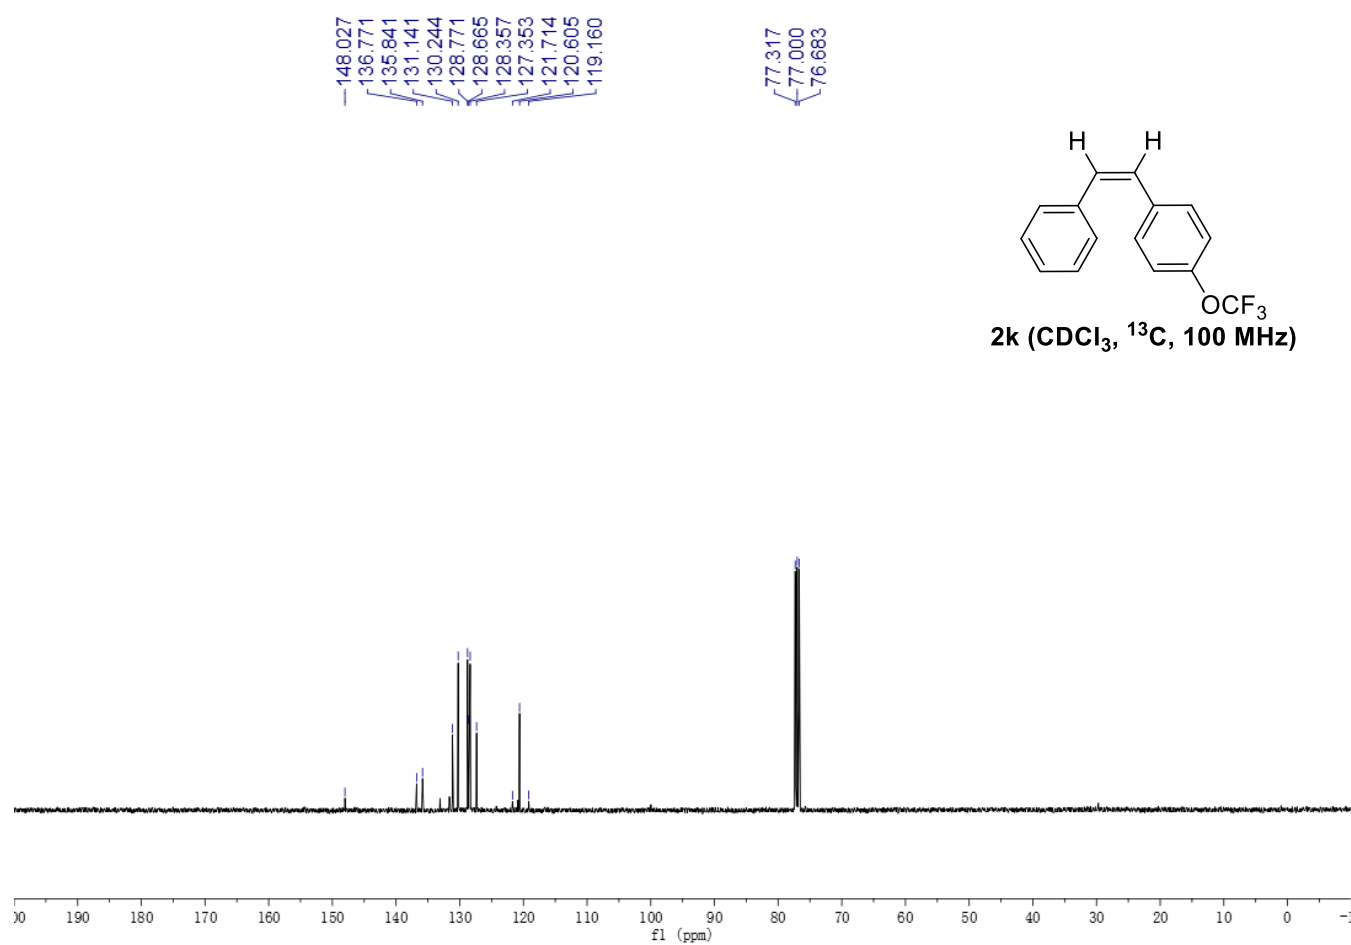

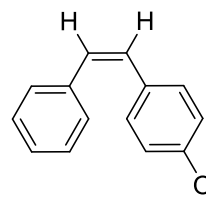

**2k** (CDCl<sub>3</sub>, <sup>19</sup>F, 376 MHz)

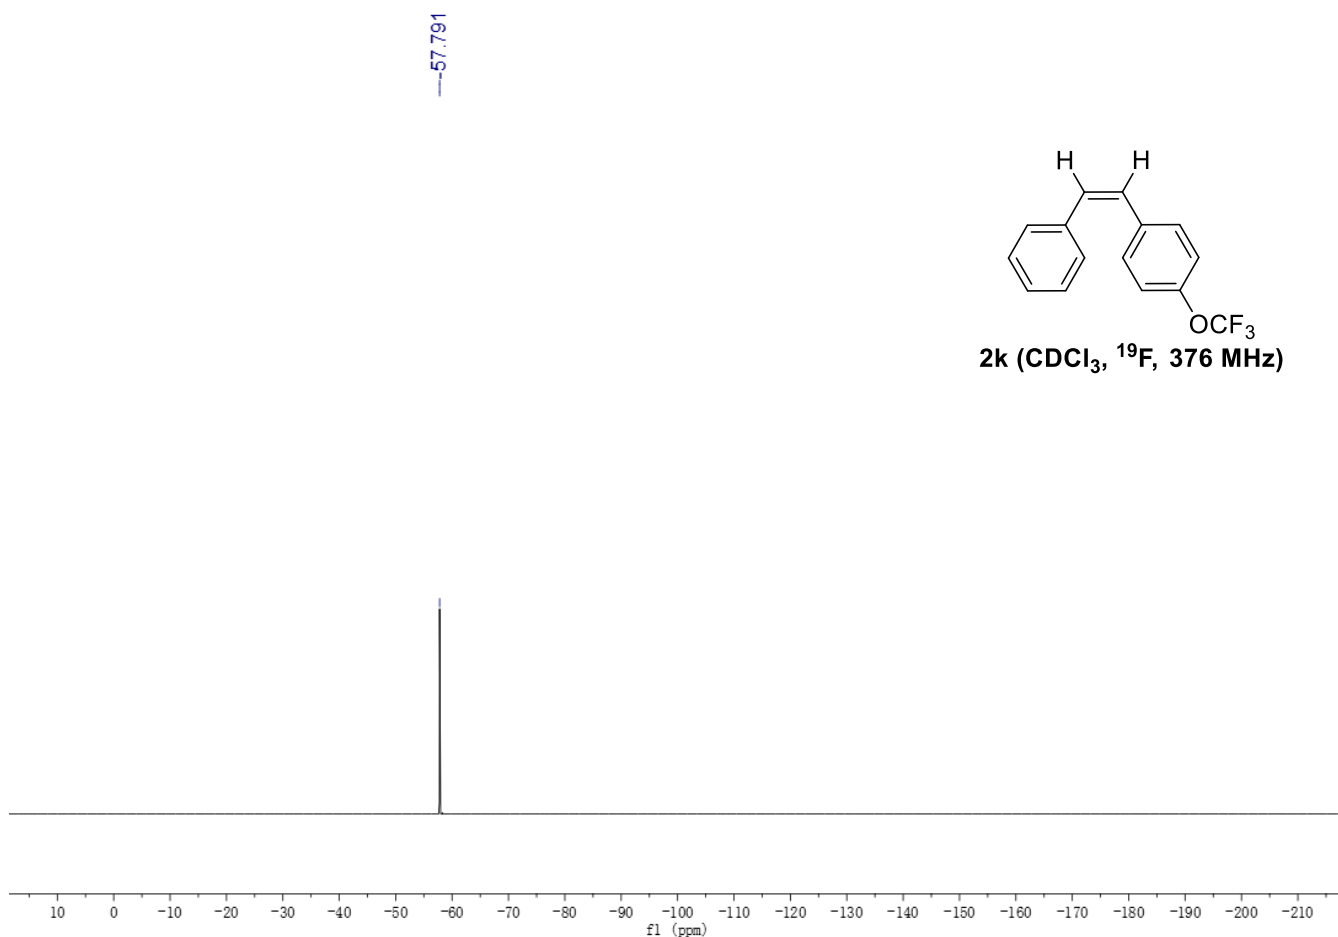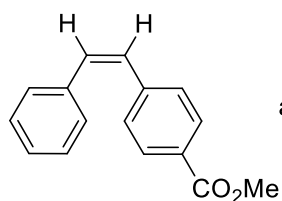

**2l** (CDCl<sub>3</sub>, <sup>1</sup>H, 400 MHz)

and

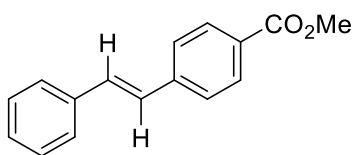

**3l** (CDCl<sub>3</sub>, <sup>1</sup>H, 400 MHz)

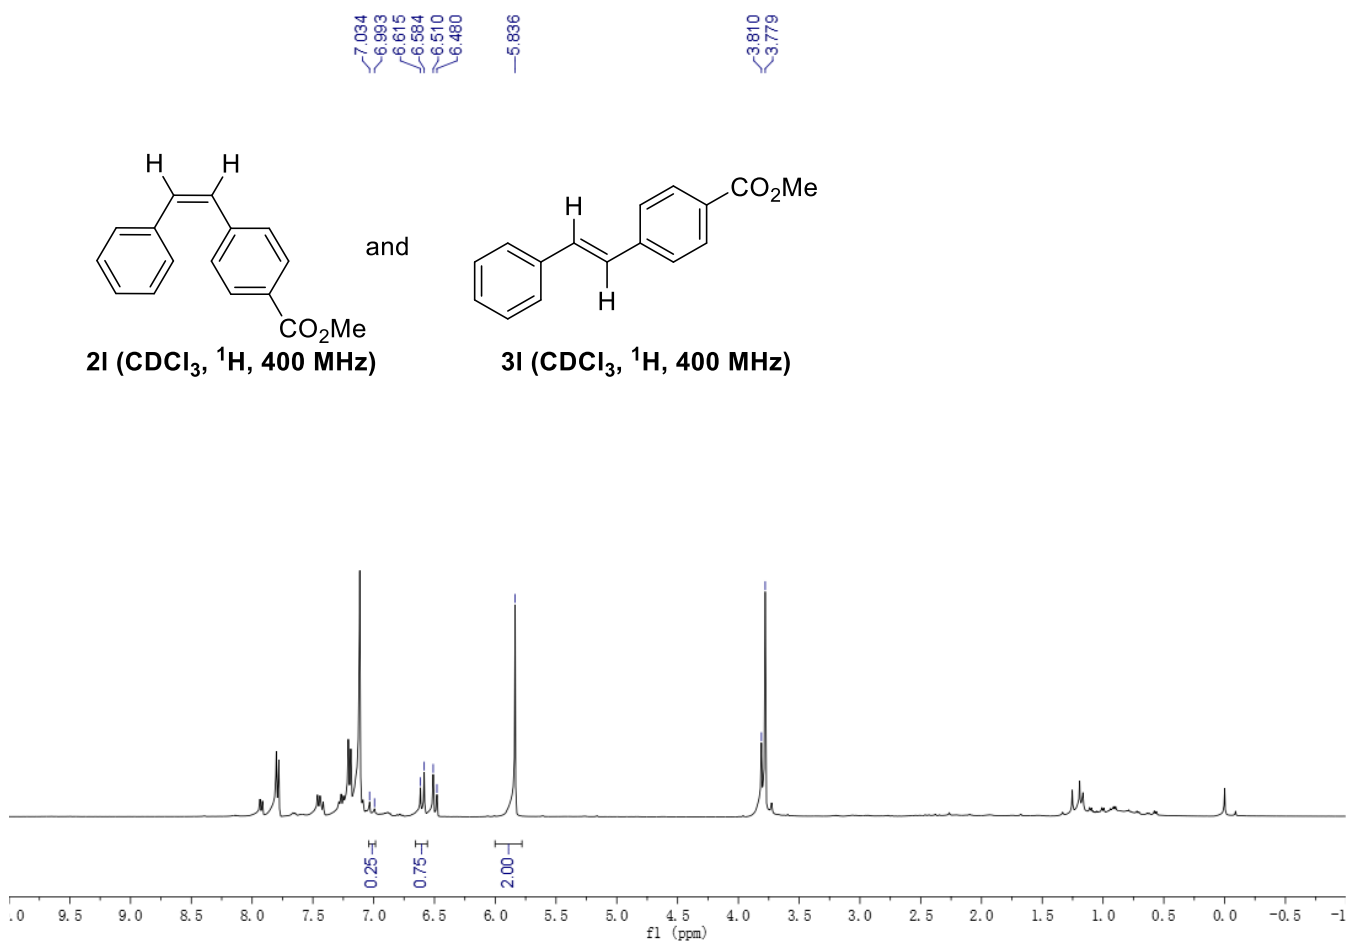

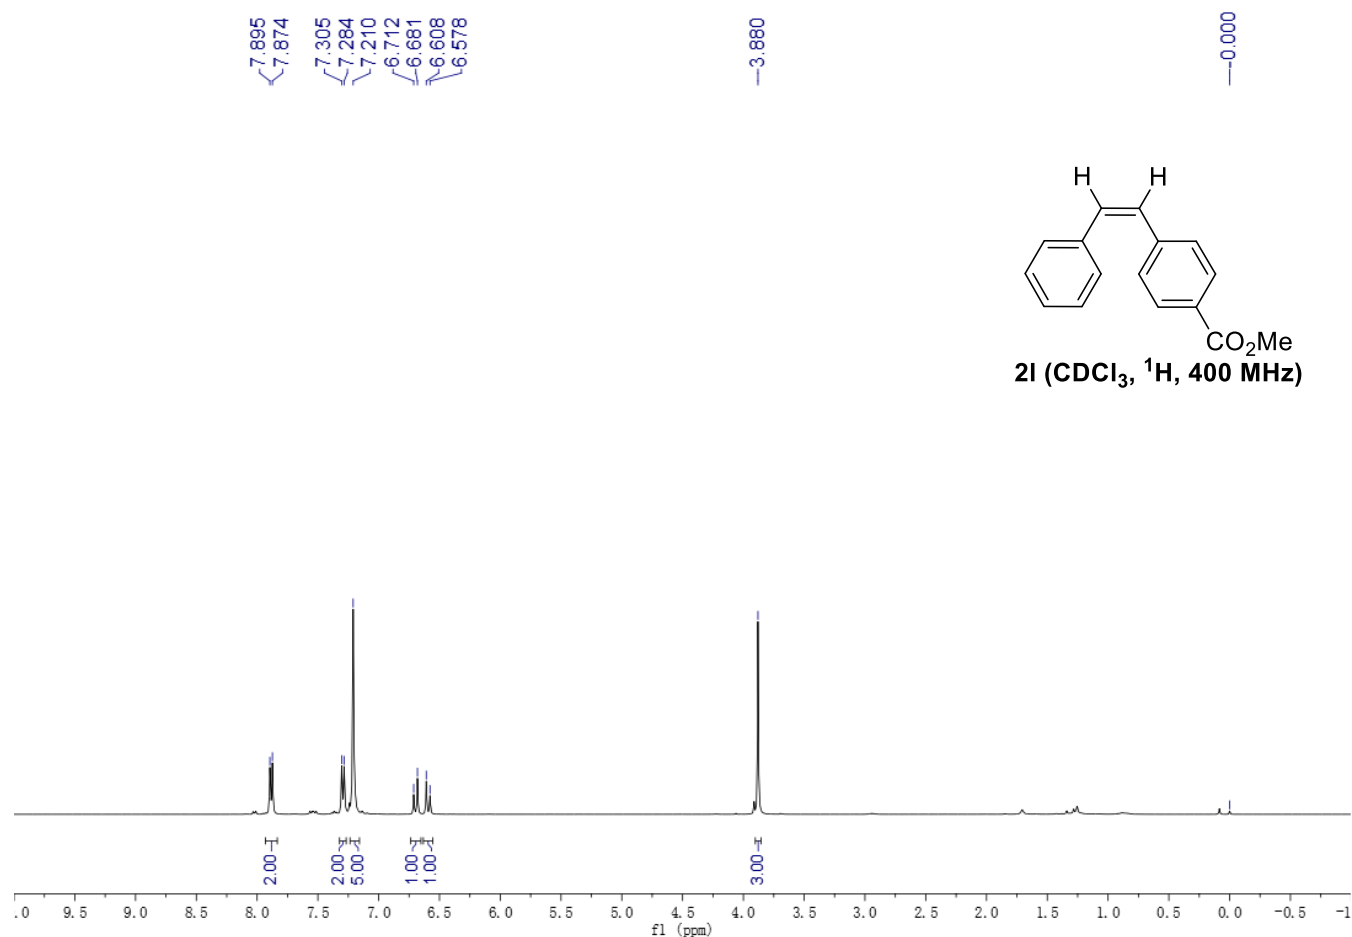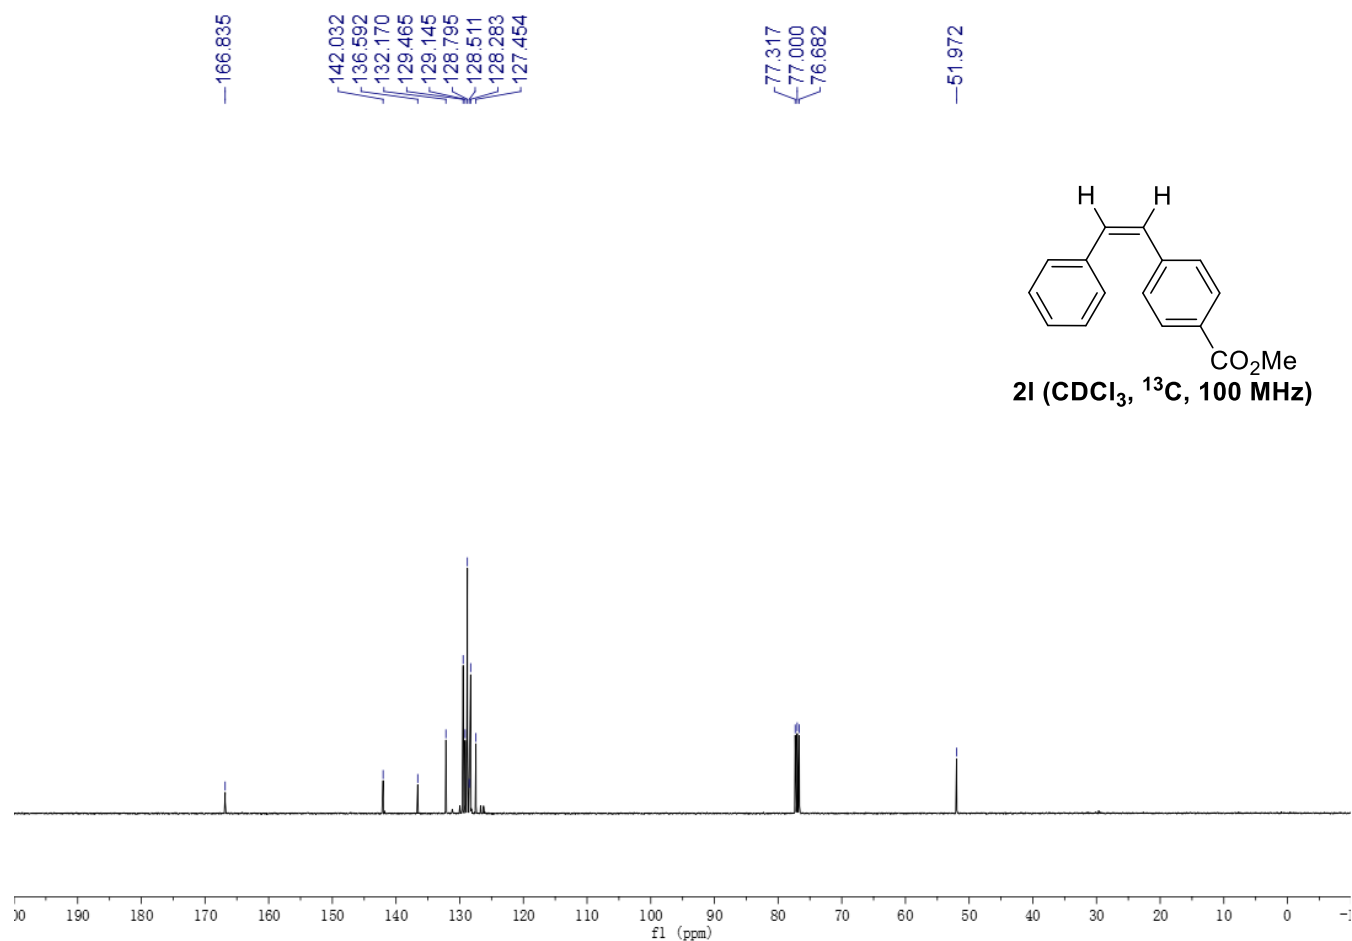

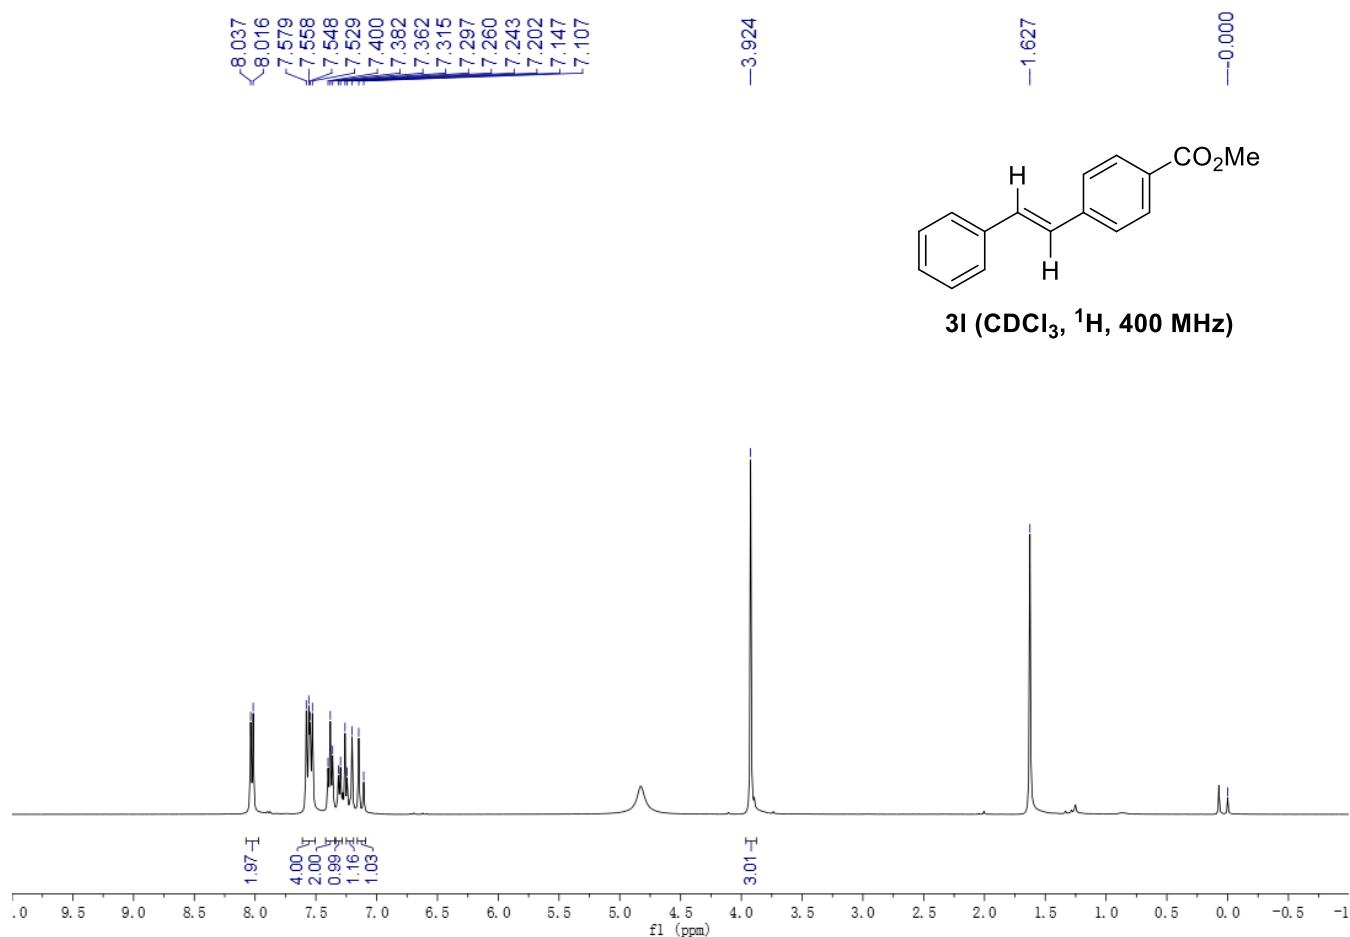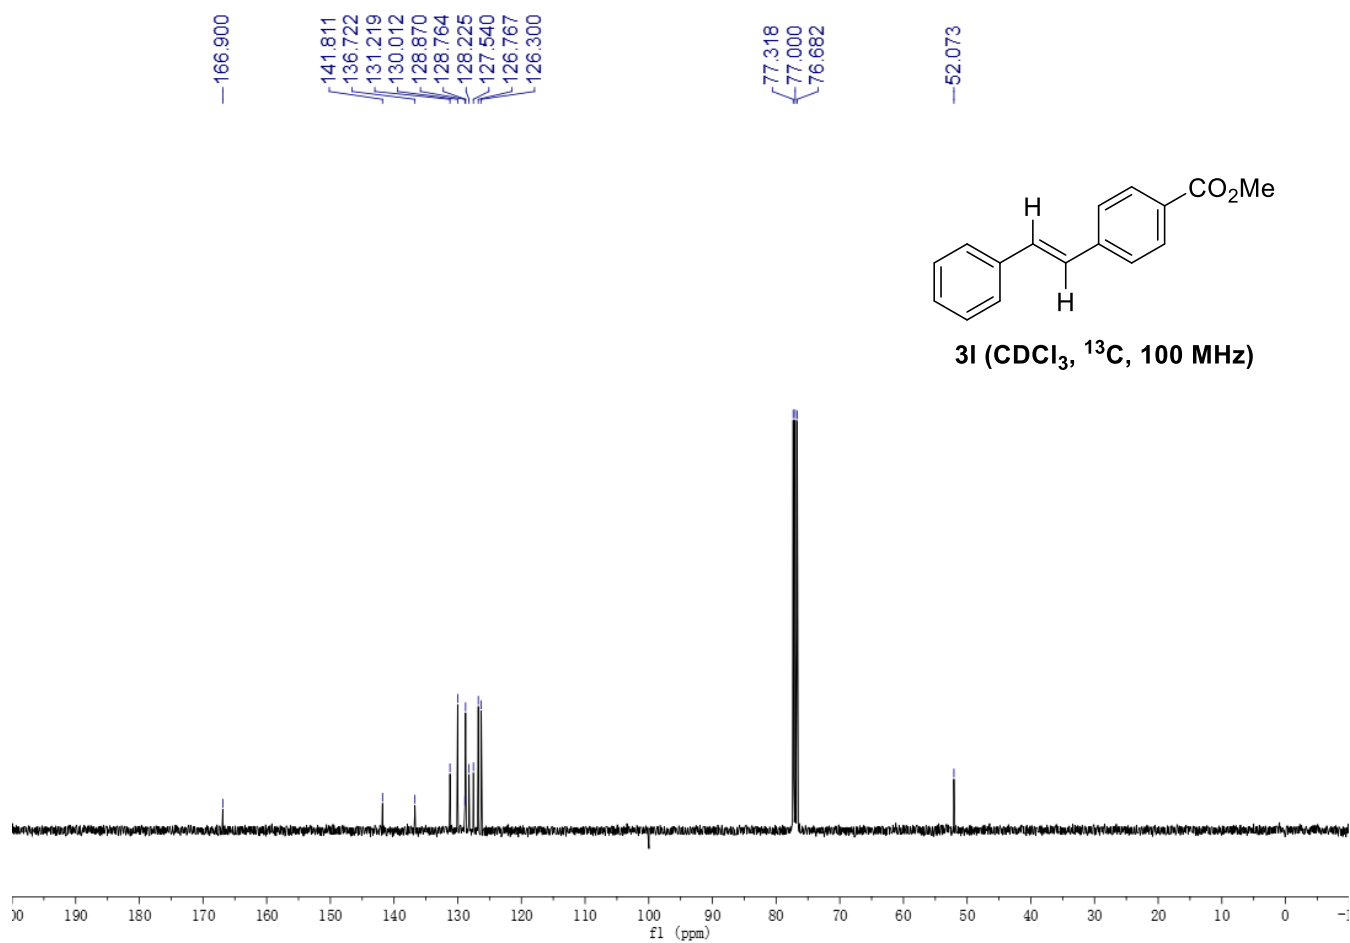



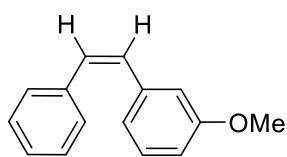

2m (CDCl<sub>3</sub>, <sup>1</sup>H, 400 MHz)

and

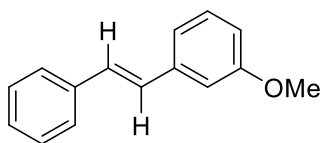

3m (CDCl<sub>3</sub>, <sup>1</sup>H, 400 MHz)

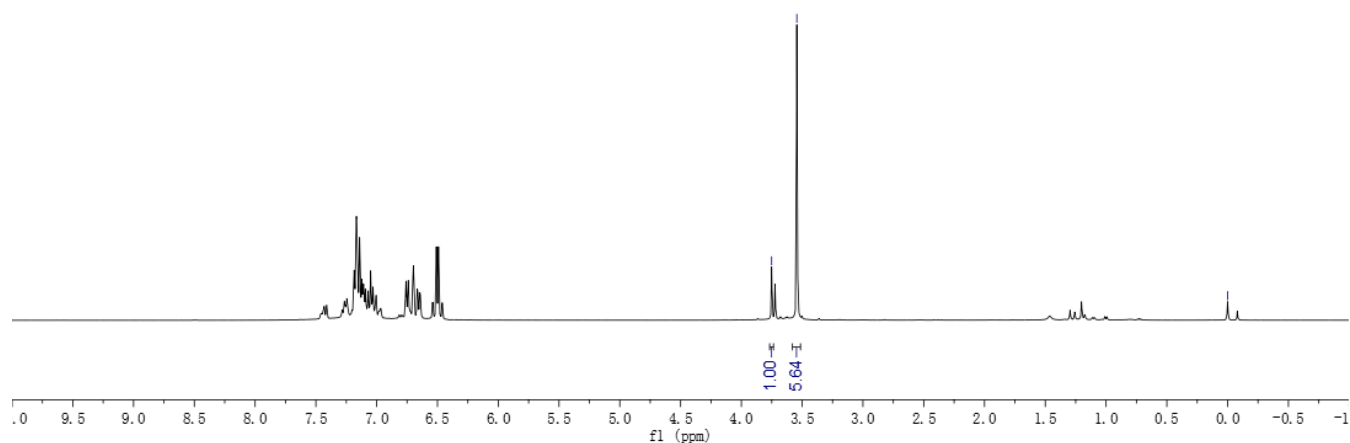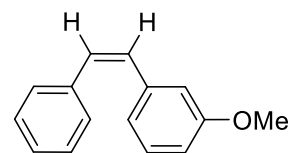

2m (CDCl<sub>3</sub>, <sup>1</sup>H, 400 MHz)

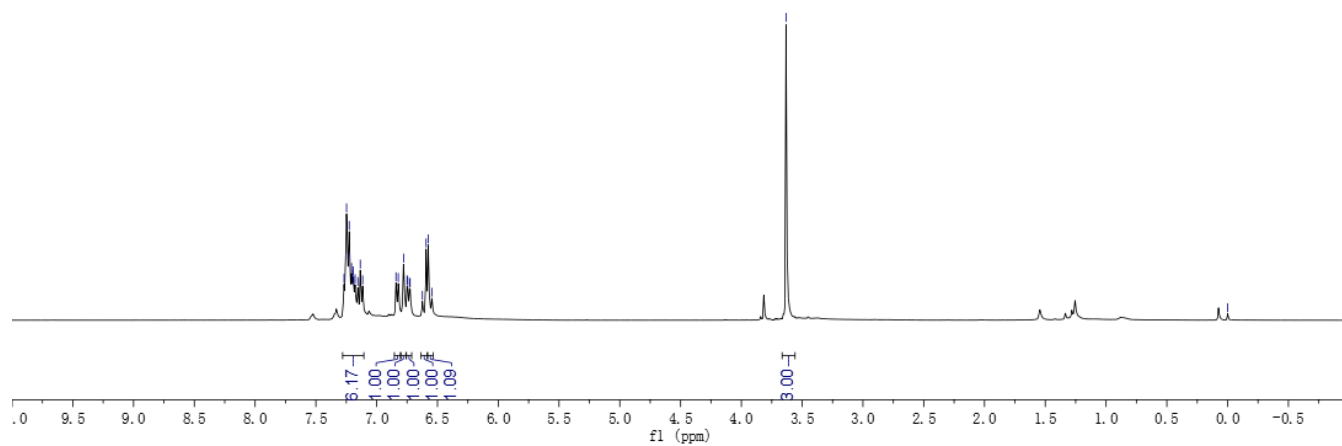

159.339  
138.523  
137.251  
130.462  
130.126  
129.187  
128.880  
128.176  
127.107  
121.492  
113.722  
113.301

77.317  
77.000  
76.682

54.983

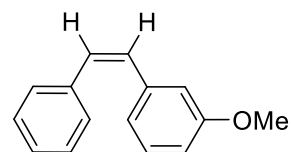

2m (CDCl<sub>3</sub>, <sup>13</sup>C, 100 MHz)

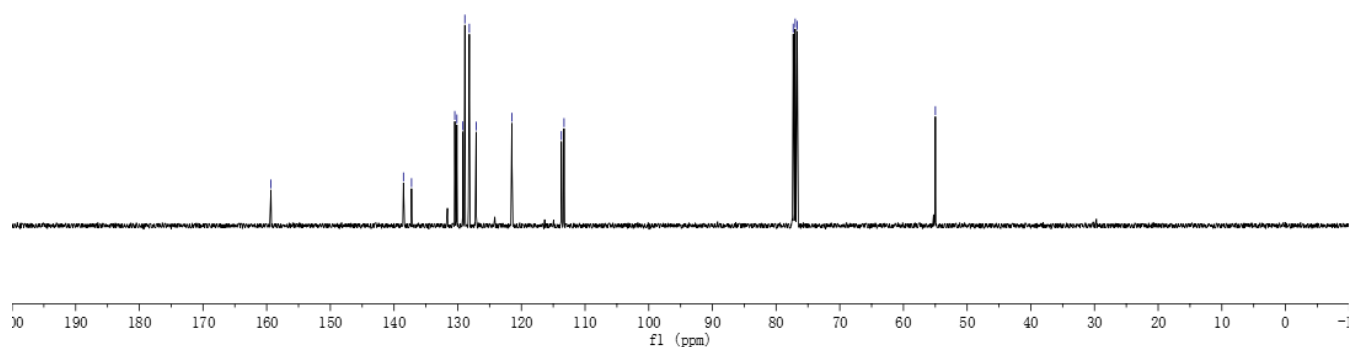

7.212  
7.200  
7.194  
7.180  
7.053  
7.030  
7.008  
6.936  
6.899  
6.730  
6.699  
6.625  
6.594

0.000

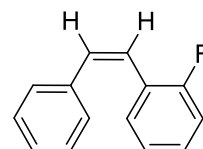

2o (CDCl<sub>3</sub>, <sup>1</sup>H, 400 MHz)

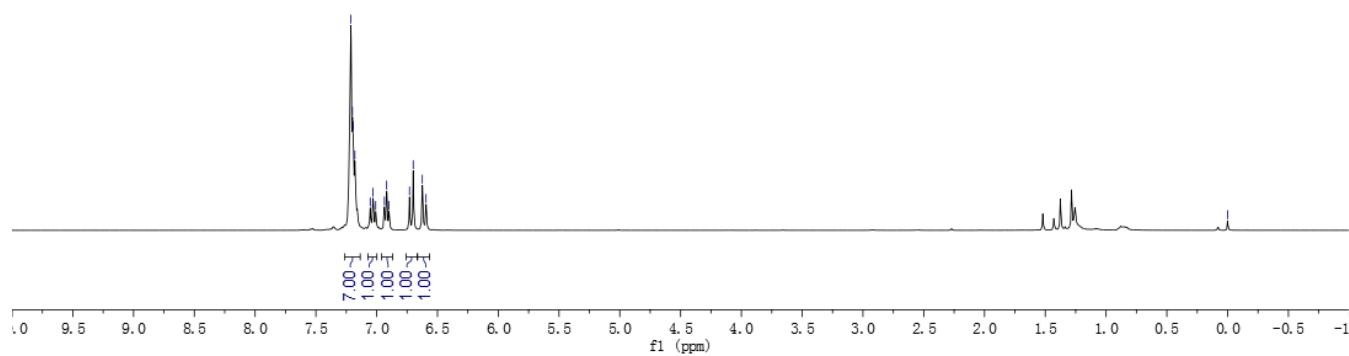

163.031  
160.579  
137.021  
133.186  
133.150  
130.542  
130.464  
130.237  
129.054  
128.799  
128.285  
127.170  
115.230  
115.017

77.317  
77.000  
76.682

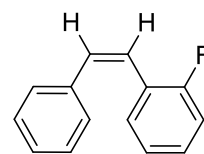

**2o** (CDCl<sub>3</sub>, <sup>13</sup>C, 100 MHz)

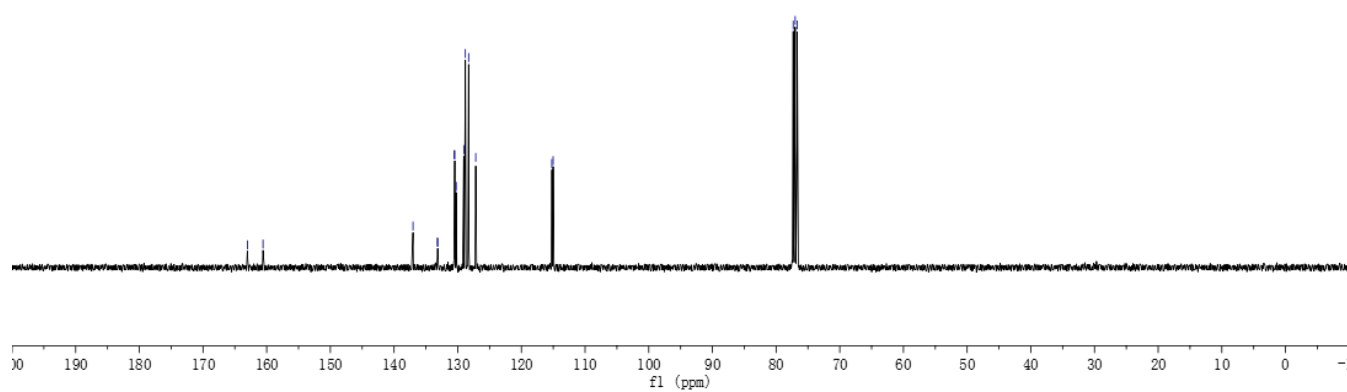

114.67

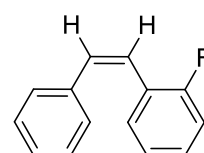

**2o** (CDCl<sub>3</sub>, <sup>19</sup>F, 376 MHz)

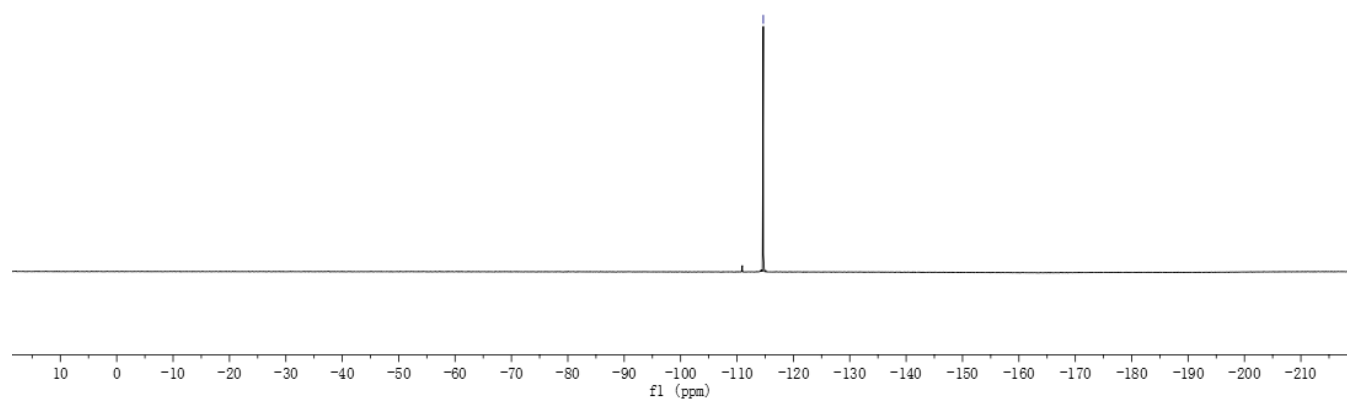

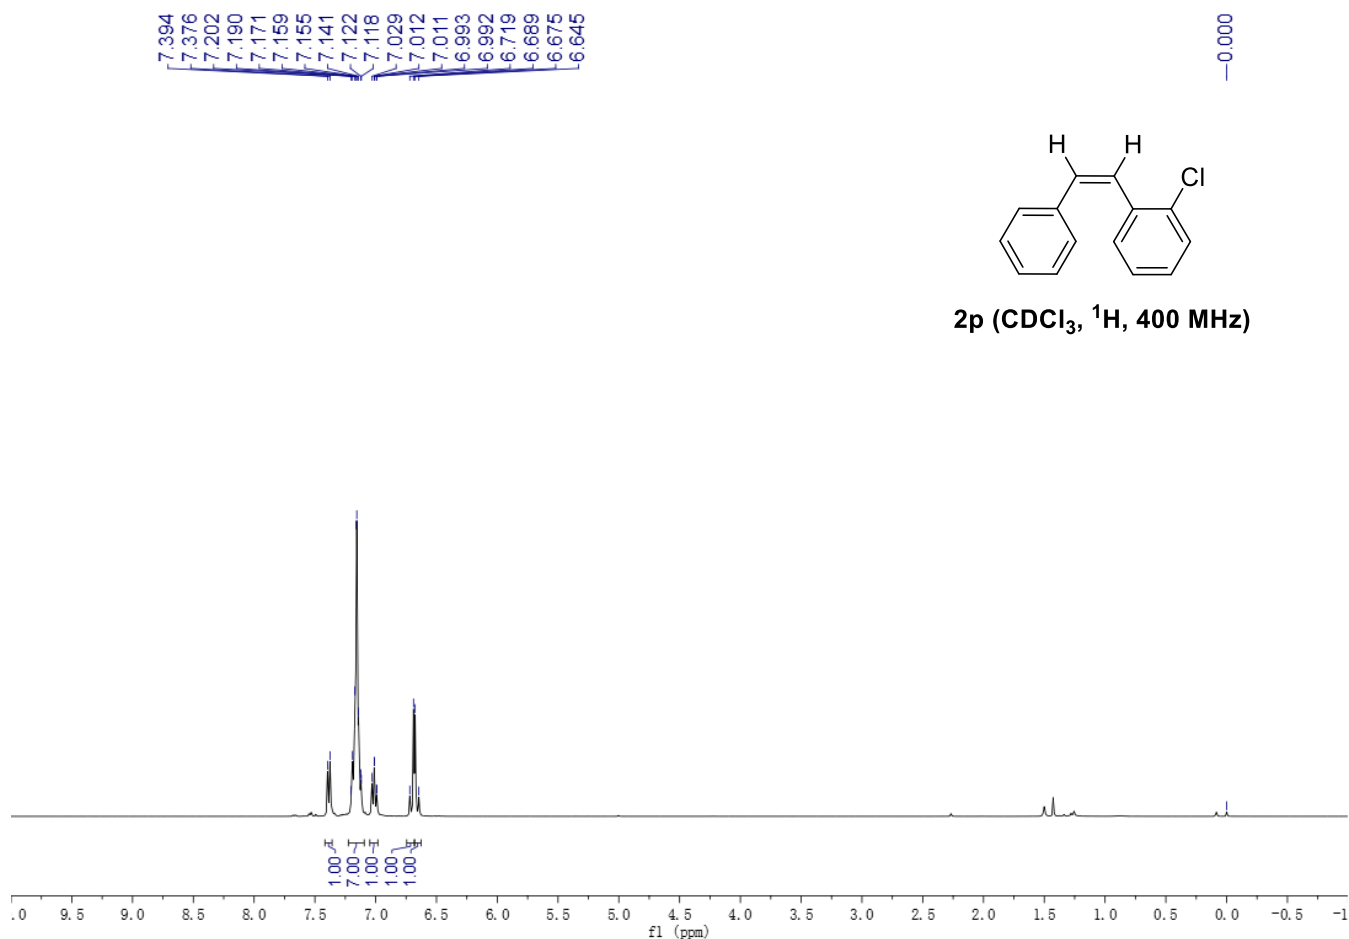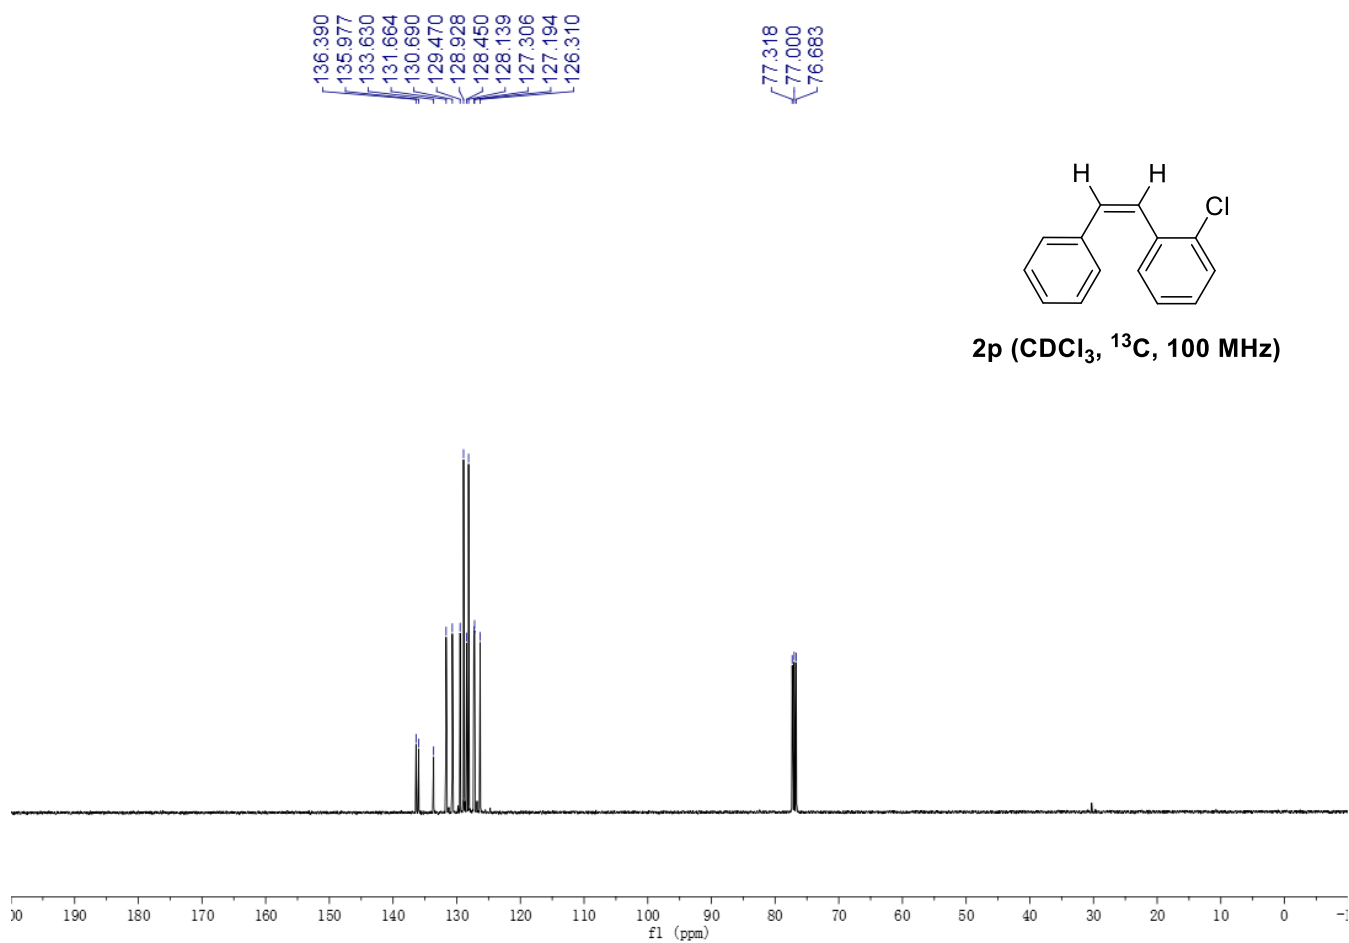

7.605  
7.596  
7.591  
7.582  
7.176  
7.163  
7.147  
7.141  
7.128  
7.096  
7.087  
7.078  
7.072  
7.064  
6.698  
6.668  
6.627  
6.596

0.000

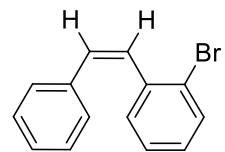

2q (CDCl<sub>3</sub>, <sup>1</sup>H, 400 MHz)

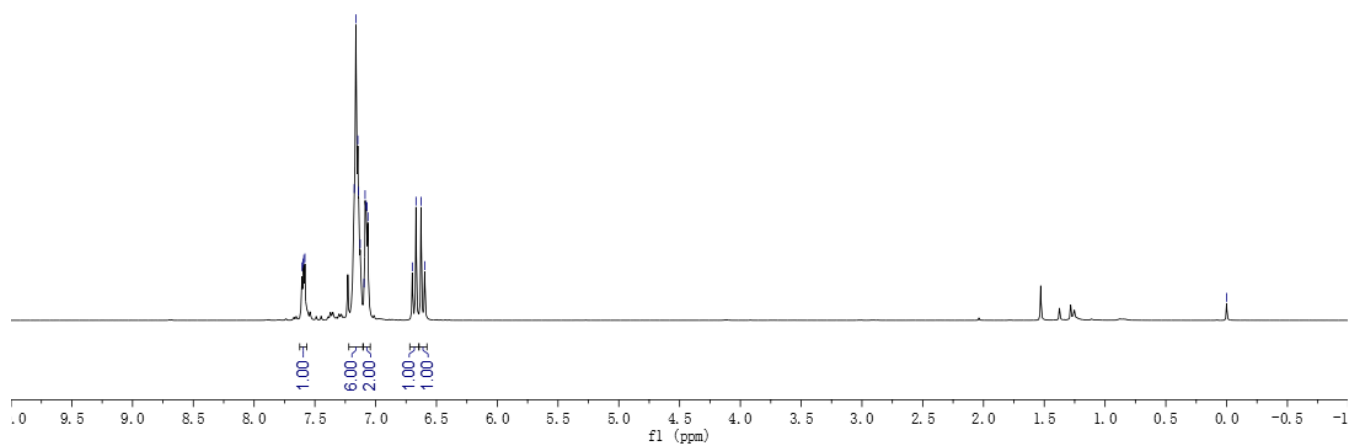

137.912  
136.272  
132.650  
131.347  
130.821  
129.441  
128.968  
128.647  
128.134  
127.290  
126.982  
123.869

77.318  
77.000  
76.682

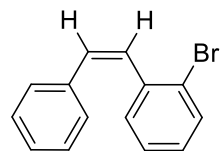

2q (CDCl<sub>3</sub>, <sup>13</sup>C, 100 MHz)

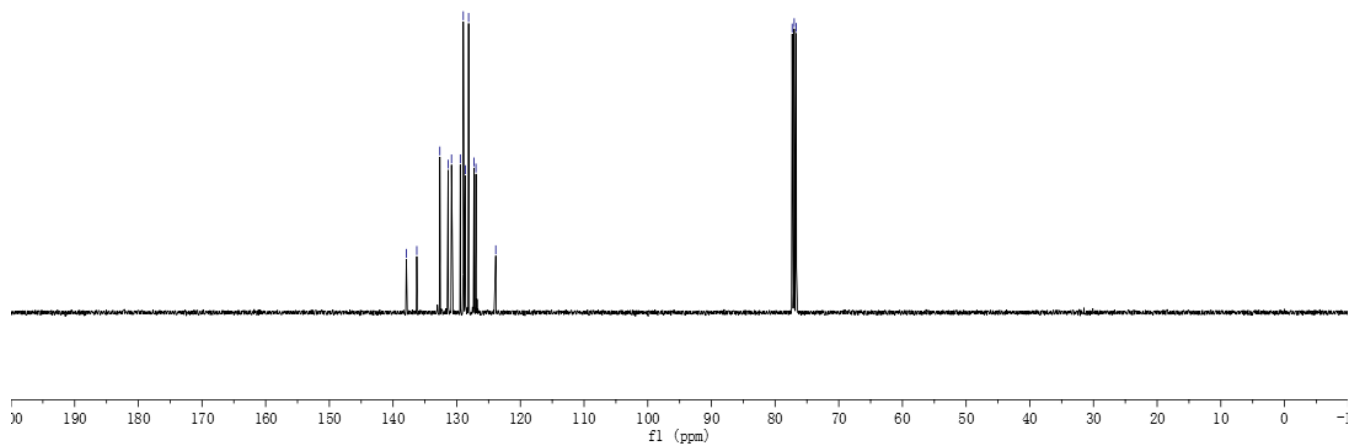

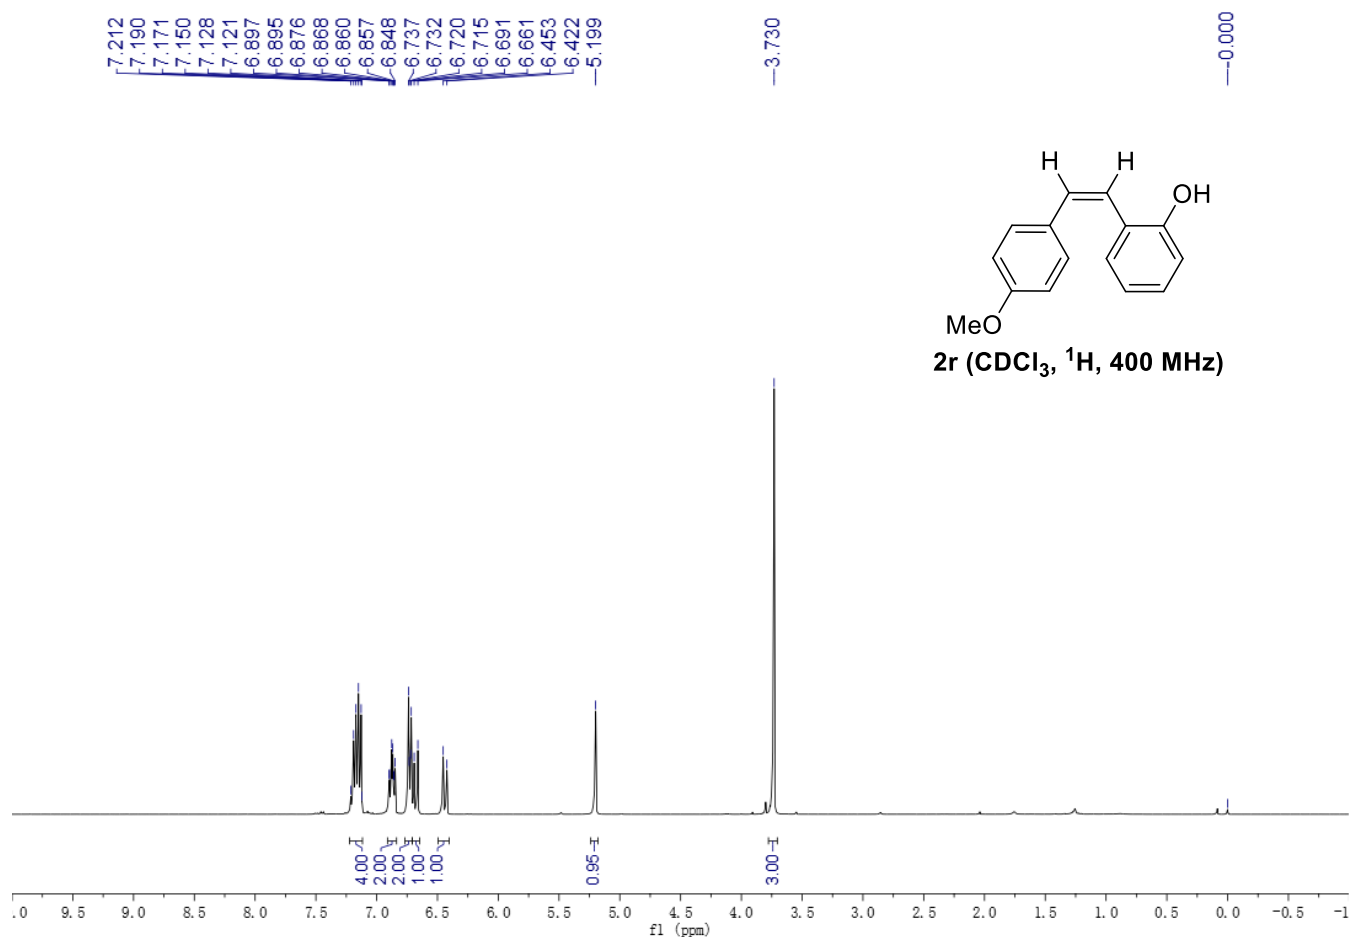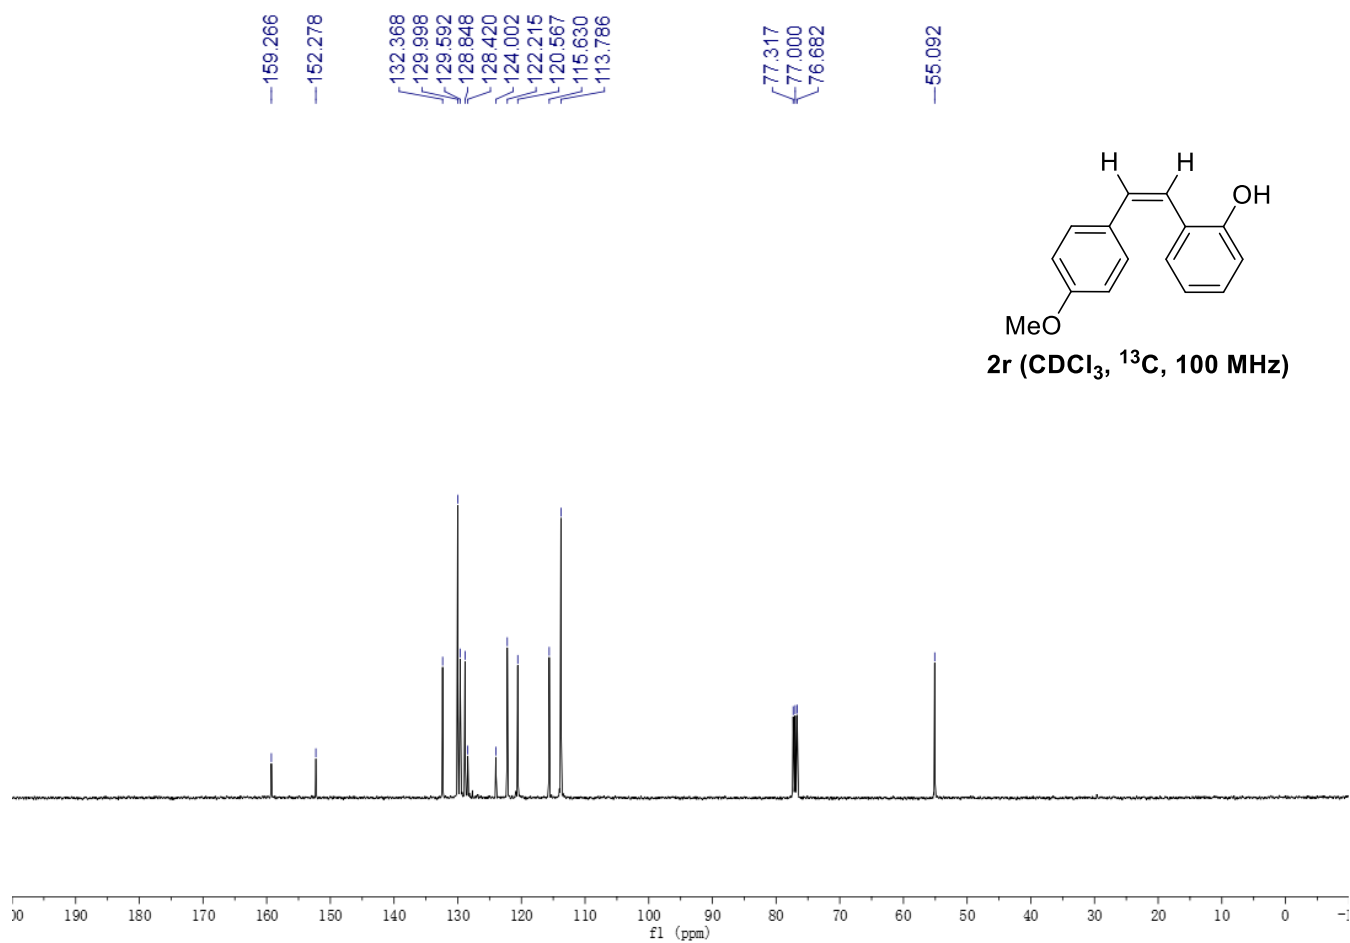

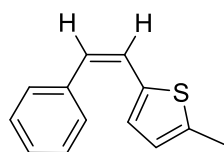

and

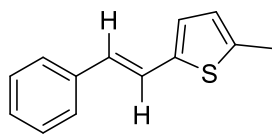

**2s** (CDCl<sub>3</sub>, <sup>1</sup>H, 400 MHz)

**3s** (CDCl<sub>3</sub>, <sup>1</sup>H, 400 MHz)

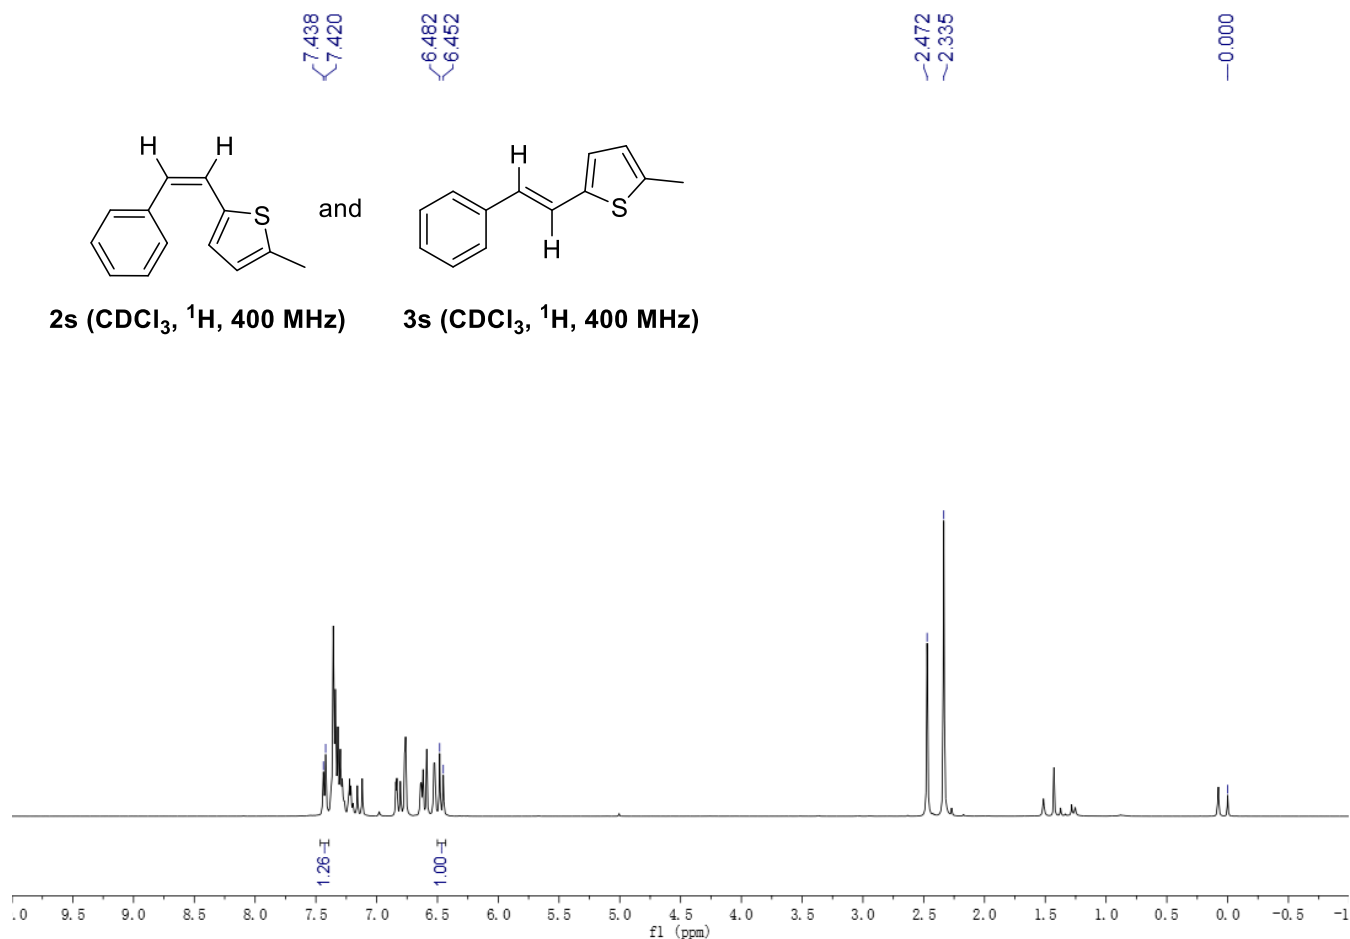

7.361, 7.345, 7.325, 7.309, 7.304, 7.297, 7.288, 7.245, 6.774, 6.766, 6.623, 6.593, 6.535, 6.532, 6.528, 6.487, 6.457

2.343

0.000

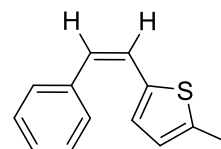

**2s** (CDCl<sub>3</sub>, <sup>1</sup>H, 400 MHz)

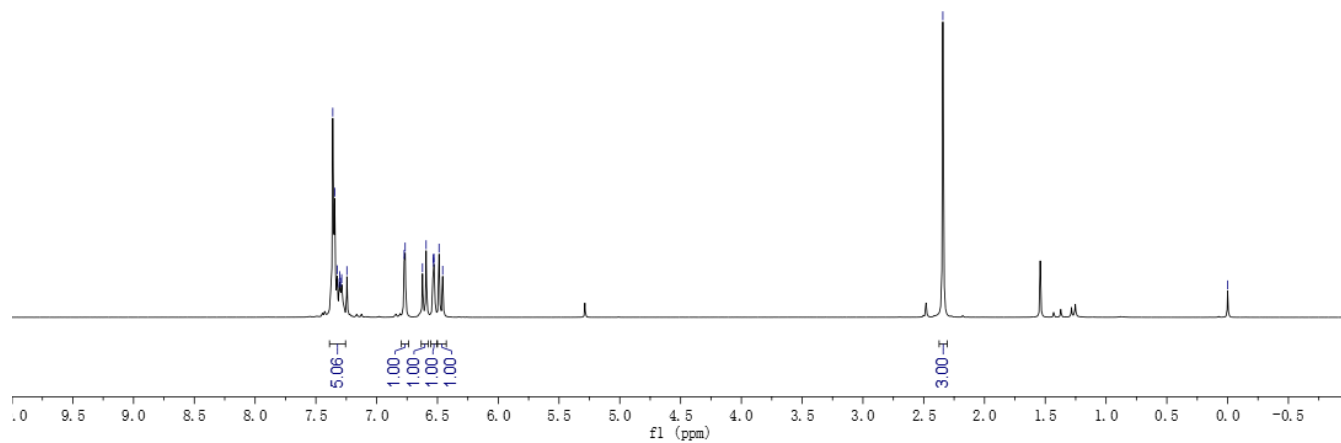

140.214  
137.675  
137.527  
128.826  
128.576  
128.438  
127.351  
127.323  
124.567  
123.717

77.318  
77.000  
76.683

15.291

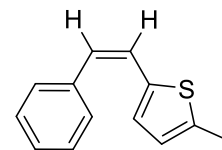

**2s** (CDCl<sub>3</sub>, <sup>13</sup>C, 100 MHz)

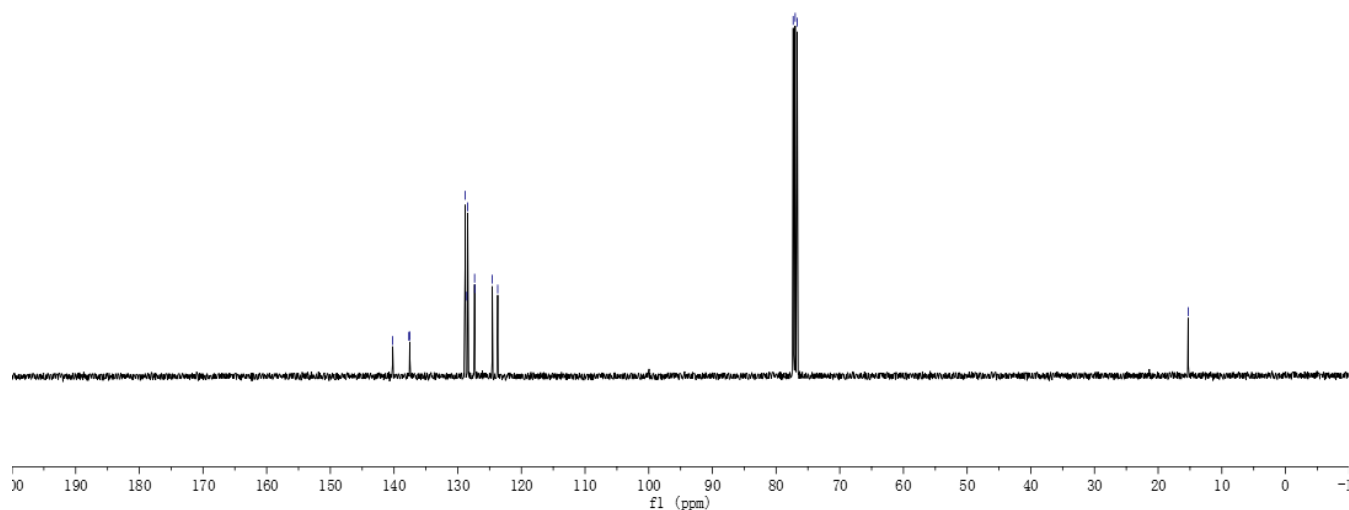

7.443  
7.424  
7.342  
7.323  
7.304  
7.239  
7.218  
7.162  
7.122  
6.846  
6.838  
6.806  
6.766  
6.643  
6.637

2.476

0.000

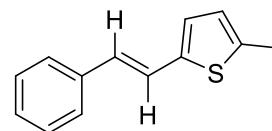

**3s** (CDCl<sub>3</sub>, <sup>1</sup>H, 400 MHz)

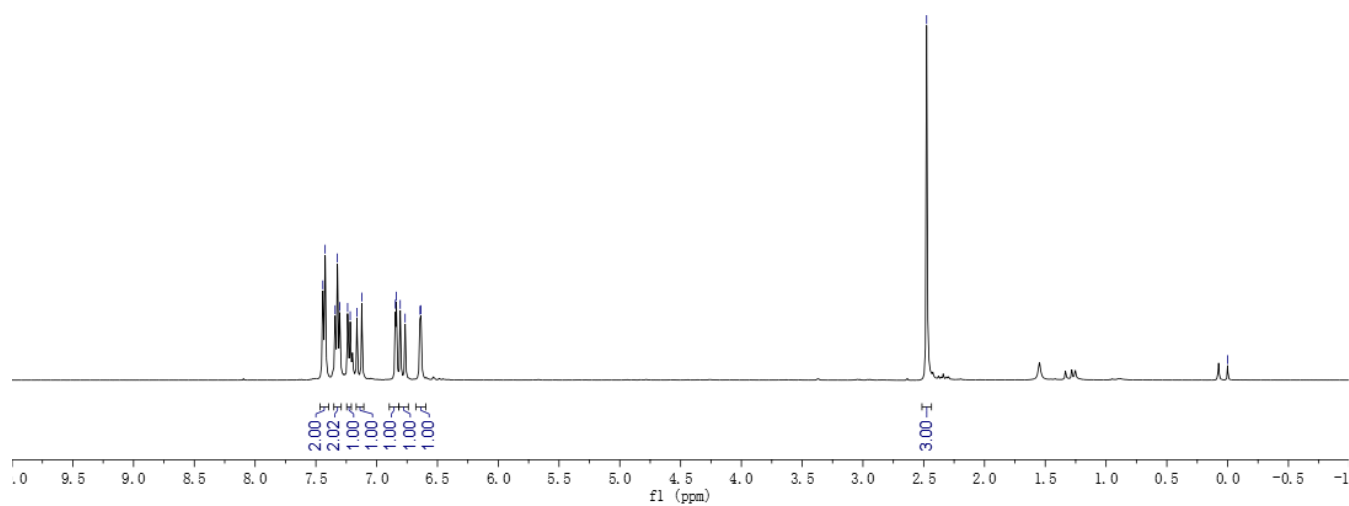



140.814  
139.252  
137.164  
128.625  
127.281  
127.017  
126.373  
126.117  
125.729  
122.140

77.318  
77.000  
76.683

15.616

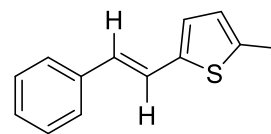

3s (CDCl<sub>3</sub>, <sup>13</sup>C, 100 MHz)

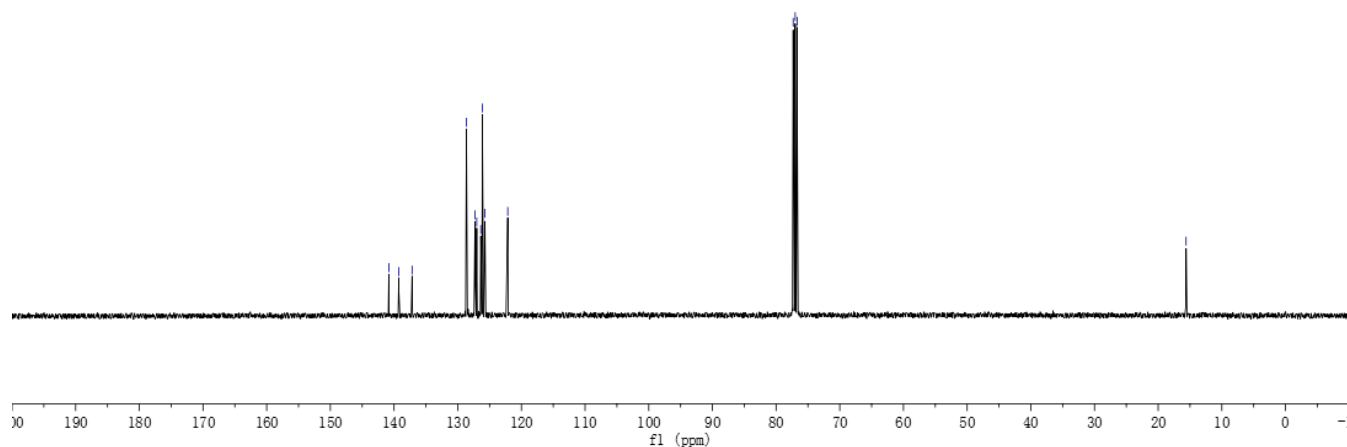

7.359  
7.340  
7.317  
7.298  
7.257  
7.237  
6.478  
6.446  
5.773  
5.741

1.621  
1.361

0.000

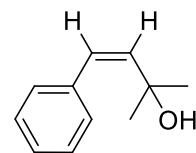

2t (CDCl<sub>3</sub>, <sup>1</sup>H, 400 MHz)

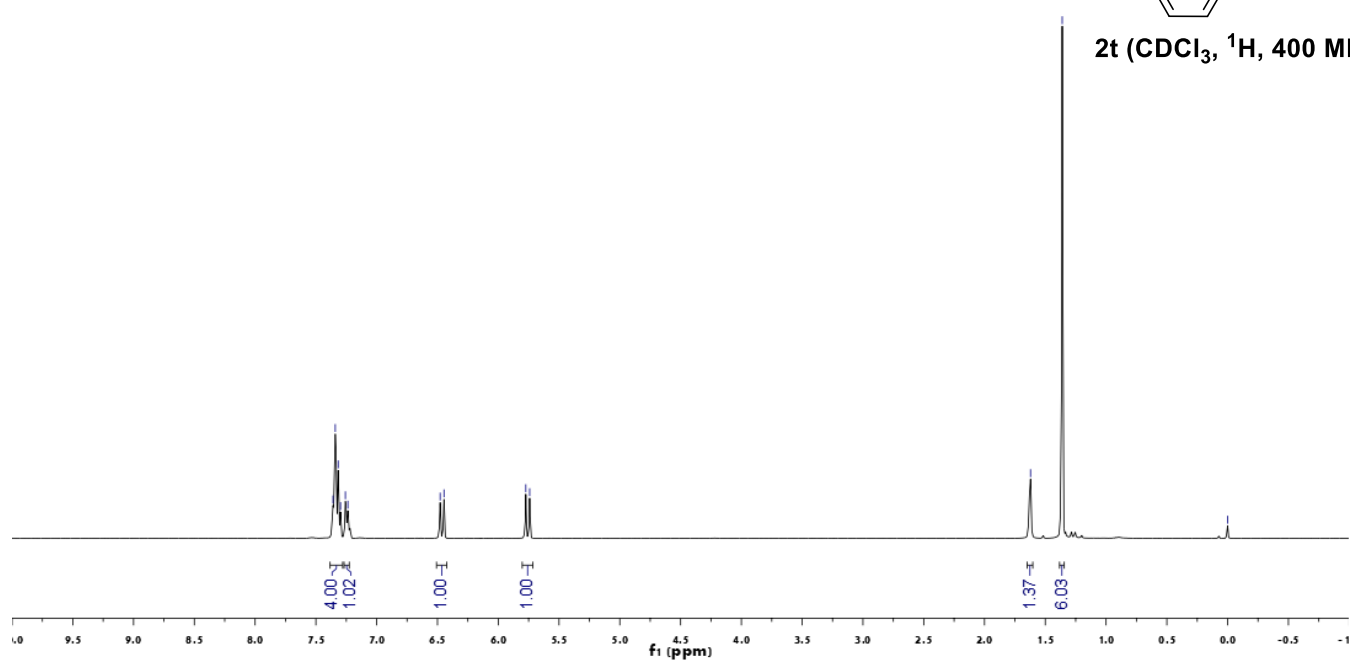

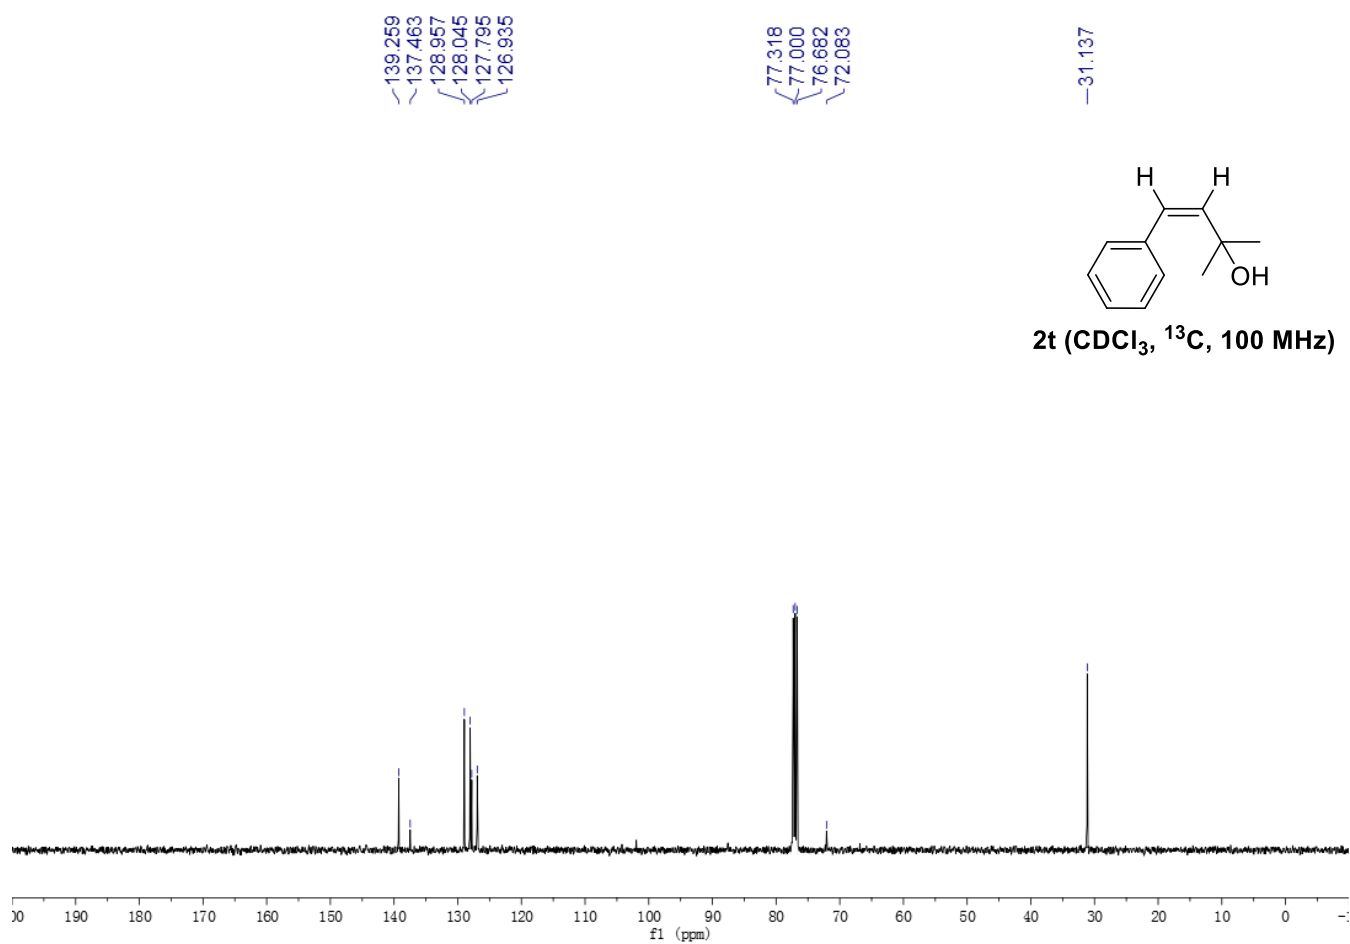

## 10. References

1. M. J. Mio, L. C. Kopel, J. B. Braun, T. L. Gadzikwa, K. L. Hull, R. G. Brisbois, C. J. Markworth and P. A. Grieco, *Org. Lett.*, 2002, **4**, 3199-3202.
2. M. C. Biesinger, B. P. Payne, A. P. Grosvenor, L. W. M. Lau, A. R. Gerson and R. S. C. Smart, *Appl. Surf. Sci.*, 2011, **257**, 2717-2730.
3. (a) J. L. Junta and M. F. Hochella, *Geochim. Cosmochim. Acta*, 1994, **58**, 4985-4999; (b) J. W. Murray, J. G. Dillard, R. Giovanoli, H. Moers and W. Stumm, *Geochim. Cosmochim. Acta*, 1985, **49**, 463-470.
4. (a) S. Bhattacharjee, D.-A. Yang and W.-S. Ahn, *Chem. Commun.*, 2011, **47**, 3637-3639; (b) R. Gostynski, J. Conradie and E. Erasmus, *RSC Adv*, 2017, **7**, 27718-27728.
5. S. Fu, N. Y. Chen, X. Liu, Z. Shao, S. P. Luo and Q. Liu, *J. Am. Chem. Soc.*, 2016, **138**, 8588-8594.
6. M. K. Armstrong, M. B. Goodstein and G. Lalic, *J Am Chem Soc*, 2018, **140**, 10233-10241.
7. E. E. Gray, L. E. Rabenold and B. C. Goess, *Tetrahedron Lett.*, 2011, **52**, 6177-6179.
8. W. F. Tian, Y. Q. He, X. R. Song, H. X. Ding, J. Ye, W. J. Guo and Q. Xiao, *Adv. Synth. Catal.*, 2020, **362**, 1032-1038.
9. M. Garbe, S. Budweg, V. Papa, Z. Wei, H. Hornke, S. Bachmann, M. Scalone, A. Spannenberg, H. Jiao, K. Junge and M. Beller, *Catal. Sci. Technol.*, 2020, **10**, 3994-4001.
10. B. J. Gregori, F. Schwarzhuber, S. Pöllath, J. Zweck, L. Fritsch, R. Schoch, M. Bauer and A. Jacobi von Wangelin, *ChemSusChem*, 2019, **12**, 3864-3870.
11. D. C. Fabry, M. A. Ronge and M. Rueping, *Chem. Eur. J.*, 2015, **21**, 5350-5354.
12. H. Bao, B. Zhou, H. Jin and Y. Liu, *J. Org. Chem.*, 2019, **84**, 3579-3589.
13. W.-F. Tian, Y. Zhu, Y.-Q. He, M. Wang, X.-R. Song, J. Bai and Q. Xiao, *Adv. Synth. Catal.*, 2021, **363**, 730-736.
14. Z. Huang, Y. Wang, X. Leng and Z. Huang, *J. Am. Chem. Soc.*, 2021, **143**, 4824-4836.
15. J. Lu, B. Pattengale, Q. Liu, S. Yang, W. Shi, S. Li, J. Huang and J. Zhang, *J. Am. Chem. Soc.*, 2018, **140**, 13719-13725.
